# Supplementary material for: Associations between body weight perception and weight control behaviour in South Indian children: a cross-sectional study
Source: PubMed Central journal article supplement — BMJ Open. 2013 Mar 9;3(3):e002239. doi: 10.1136/bmjopen-2012-002239 (PMC3612746; doi:10.1136/bmjopen-2012-002239), 2013-03-09
Supplement: bmjopen-2012-002239.draft_revisions.pdf [file bmjopen-2012-002239.draft_revisions.pdf]

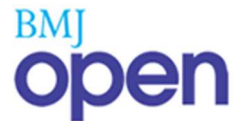

**BODY WEIGHT PERCEPTION INFLUENCES WEIGHT LOSS BEHAVIOR IN SOUTH INDIAN CHILDREN ACROSS A WIDE BODY WEIGHT RANGE- A CROSS-SECTIONAL STUDY**

|                                 |                                                                                                                                                                                                                                                                                                                                                                                                                         |
|---------------------------------|-------------------------------------------------------------------------------------------------------------------------------------------------------------------------------------------------------------------------------------------------------------------------------------------------------------------------------------------------------------------------------------------------------------------------|
| Journal:                        | <i>BMJ Open</i>                                                                                                                                                                                                                                                                                                                                                                                                         |
| Manuscript ID:                  | bmjopen-2012-002239                                                                                                                                                                                                                                                                                                                                                                                                     |
| Article Type:                   | Research                                                                                                                                                                                                                                                                                                                                                                                                                |
| Date Submitted by the Author:   | 18-Oct-2012                                                                                                                                                                                                                                                                                                                                                                                                             |
| Complete List of Authors:       | Swaminathan, Sumathi; St John's Research Institute, Division of Nutrition<br>Selvam, Sumithra; St John's Research Institute, Department of<br>Epidemiology and Biostatistics<br>Maria, Pauline; St John's Medical College and Hospital, Department of<br>Physiology<br>Vaz, Mario; St John's Medical College and Hospital, Department of<br>Physiology; St John's Research Institute, Division of Humanities and Health |
| <b>Primary Subject Heading</b>: | Public health                                                                                                                                                                                                                                                                                                                                                                                                           |
| Secondary Subject Heading:      | Nutrition and metabolism                                                                                                                                                                                                                                                                                                                                                                                                |
| Keywords:                       | Community child health < PAEDIATRICS, PUBLIC HEALTH, EPIDEMIOLOGY, Cross Sectional Study, INDIA                                                                                                                                                                                                                                                                                                                         |
|                                 |                                                                                                                                                                                                                                                                                                                                                                                                                         |

SCHOLARONE™  
Manuscripts

1  
2  
3 BODY WEIGHT PERCEPTION INFLUENCES WEIGHT LOSS BEHAVIOR IN SOUTH  
4 INDIAN CHILDREN ACROSS A WIDE BODY WEIGHT RANGE– A CROSS-  
5 SECTIONAL STUDY  
6

7 Sumathi Swaminathan *Assistant Professor Division of Nutrition*<sup>1</sup>, Sumithra Selvam *Lecturer*  
8 *Division of Biostatistics and Epidemiology*<sup>1</sup>, Maria Pauline *Assistant Professor, Department*  
9 *of Physiology*<sup>2</sup>, Mario Vaz *Professor Department of Physiology and Division of Humanities*  
10 *and Health*<sup>1,2</sup>  
11

12  
13 <sup>1</sup>St. John's Research Institute, St John's National Academy of Health Sciences, Koramangala,  
14 Bangalore- 560 034, Karnataka, India; <sup>2</sup> St.John's Medical College & Hospital, St. John's  
15 National Academy of Health Sciences, Koramangala, Bangalore- 560 034, Karnataka, India  
16  
17  
18  
19  
20  
21  
22  
23

24 Correspondence to: Sumathi Swaminathan  
25 E-mail: [sumathi@sjri.res.in](mailto:sumathi@sjri.res.in)  
26 St John's Research Institute,  
27 St John's national Academy of Health Sciences,  
28 Koramangala, Bangalore: 560 034  
29 Karnataka, India  
30  
31  
32  
33  
34  
35  
36  
37  
38

39 Short title: Body weight perception influences weight loss in South Indian children  
40  
41  
42  
43  
44  
45  
46  
47  
48  
49  
50  
51  
52  
53  
54  
55  
56  
57  
58  
59  
60

**Abstract:**

**Objective:** To examine the patterns of weight loss behaviour and the relationship between weight loss attempts with actual weight status and children's and parental perceptions of weight status.

**Design:** Cross sectional study

**Setting:** Karnataka, South India

**Participants:** 1907 girls and boys aged 8 to 14 years from 7 schools in Karnataka, South India

**Main outcome measures:** The association between weight loss attempts and socio-demographic factors, weight status and the child's or parent's perception of weight status.

**Results:** Approximately 73% of overweight and obese, 35% of normal weight and 22% of underweight children attempted to lose weight. Children of lower socio-economic groups studying in schools in the local vernacular and overweight/obese children were more likely to attempt to lose weight (AOR=1.57, 95% CI: 1.11 to 2.25; AOR= 4.38, 95% CI: 2.64 to 7.28, respectively). Perception of weight status was important in influencing weight loss attempts. Thus, children who were normal weight but perceived themselves to be overweight / obese were three times likely to attempt weight loss, while the odds of attempting weight loss were the highest for those who were overweight and perceived themselves to be so (AOR ~ 18).

**Conclusions:** Weight loss is attempted by children in India irrespective of their weight status, age and gender. Children who were actually overweight as well as those who were perceived by themselves or by their parents to be overweight were highly likely to try to lose weight. It is necessary to understand body weight perceptions in communities with a dual burden of overweight and under-nutrition, if intervention programmes for either are to be successful.

1  
2  
3  
4  
5  
6  
7  
8  
9  
10  
11  
12  
13

#### ARTICLE FOCUS:

- Patterns of weight loss behaviour and the relationship between weight loss attempts with actual weight status and children's and parental perceptions of weight status.

#### KEY MESSAGES

- There are no data on body weight perceptions of children and the relation to weight loss in India where both overweight and underweight in children co-exist in the community. It is essential to understand body weight perceptions by both children and their parents to tailor intervention programmes that can work in communities with concurrent under- and over-nutrition.
- Weight loss is attempted by children irrespective of weight status, age and gender.. However, those who perceive that they are overweight have higher odds of trying to lose weight, even though they may be normal weight.

14  
15  
16  
17  
18  
19  
20  
21  
22  
23  
24  
25  
26  
27  
28  
29  
30  
31  
32  
33  
34  
35  
36  
37  
38  
39  
40  
41  
42  
43  
44  
45  
46  
47  
48  
49  
50  
51  
52  
53  
54  
55  
56  
57  
58  
59  
60

#### STRENGTHS AND LIMITATIONS

- This is the first study to report perceptions of body weight in India in relation to weight loss attempts.
- With the cross-sectional study design used in this study, the changes in perception as the children grow cannot be accounted for.

## INTRODUCTION:

Body image is a psycho-social dimension of body size that encompasses both perceptual and attitudinal factors<sup>1</sup> and has been associated with eating disorders. In recent years, its association with overweight and obesity has been described<sup>2</sup>. It is recognised that individuals make decisions on lifestyle behaviours based on body weight perceptions (a dimension of body image)<sup>1 3</sup>. A unique situation exists in India, where there is a large burden of under-nutrition alongside increasing overweight and obesity. For public health and clinical programmes to be more effective, body image of undernourished and overweight children should be understood in the context of the influence of culture on body weight perceptions and on weight management behaviours.

A large number of studies have indicated that children and adolescents misperceive their body weight status. Interventions that address socio-cultural attitudes towards appearance should ideally reduce body image dissatisfaction as well as overweight and obesity since studies have indicated a relationship between body image, unhealthy eating practices and obesity<sup>4 5</sup>. Perceptions of body weight are, in part, influenced by external factors including cultural norms and social preferences. The disconnect between actual weight and perception of body size could stem from the extent to which individuals identify with the majority cultural standards of beauty<sup>6</sup>. There are also reports that individuals in less socio-economically developed societies positively evaluate overweight and obese figures<sup>7</sup>. Evidence also suggests associations of actual body weight, body weight perceptions and weight dissatisfaction with weight control practices; overweight children are more likely to try to lose weight compared to non-overweight children<sup>8 9</sup>. Analysis of data from the National Health and Nutrition Examination Survey (NHANES)<sup>10</sup> and the Youth Risk Behaviour Surveillance Survey (YRBSS)<sup>6 11</sup> indicate that those overweight children who perceived their weight status correctly were more likely to exercise or eat less for weight control. Results from an analysis from Europe, Israel and North America as part of the Health Behaviour in School aged Children (HBSC) 2001/2002 survey indicated that weight status perception of weight and age were significant factors influencing current attempt to lose weight<sup>9</sup>.

For healthy weight management it is necessary for a person to perceive his or her weight status accurately as well as be aware of healthy methods to lose or gain weight. Most literature on body weight perceptions and weight control behaviours are related to studies done in developed countries<sup>6 8 10 12</sup> with a few on ethnic minorities, including South Asians<sup>2</sup>

1  
2  
3 13. The present analysis aims to examine the associations between the actual weight status,  
4 body weight perceptions of both children and their parents, and body weight satisfaction with  
5 weight loss intentions. The study sample included a wide range of body weights to reflect the  
6 dual burden of under-nutrition and overweight/obesity that India currently faces.  
7  
8

## 9 10 **METHODS:**

### 11 12 **Study population:**

13  
14 A total of 2083 school children aged 8 to 14 years from 7 schools of varying socio-economic  
15 status located in rural areas, towns in Karnataka and urban Bangalore in South India, were  
16 contacted at baseline out of which 1907 (91.6%) children participated in a longitudinal study  
17 on body image perceptions and growth indices of school children, details of which are  
18 published earlier <sup>14</sup>. The sample recruited had adequate power (above 80 %) to identify the  
19 significant socio-demographic predictors for perception of body image in the present study  
20 and to estimate a difference of at least 10% over-estimation or under-estimation of body  
21 weight at 5% level of significance. Ethical approval was obtained from the Institutional  
22 Ethical Review Board. Principals of schools were contacted for permission to conduct the  
23 study in their schools. Written parental consent and assent from the child was also obtained  
24 and confidentiality. A questionnaire to assess body image perception was administered by an  
25 investigator (MP) to all the consenting students in a class by reading aloud the questions in  
26 either English or Kannada (the local language). Responses were marked on the questionnaire  
27 by each child. A short questionnaire in English or the local language to be filled by one of the  
28 parents was sent home after the children completed their questionnaires. Children whose  
29 parents were illiterate (6.7% mothers, 5.9% fathers), elicited the answers from either of their  
30 parents and filled up the questionnaire.  
31  
32

### 33 34 **Measurements:**

35  
36 Height was measured using a fibreglass tape without foot wear to 0.2 cm. Weight was  
37 measured in school clothing but without shoes using a calibrated digital scale (Home Health,  
38 Model 8604, Dr. Morepen Lab, Hong Kong) to the nearest 100 gm. All measurements were  
39 made using a standardized protocol. Body mass index (BMI) was computed and the BMI-  
40 for-age z score values were obtained using the World Health Organization Anthroplus  
41 software version 1.0.2 (WHO, Geneva, Switzerland). Children were then categorized by  
42 actual weight status as overweight (>+1 SD), normal (< -2 to +1) and underweight (< -2  
43 SD). These values at 19 years of age, at +1 standard deviation (SD) correspond to the BMI  
44  
45  
46  
47  
48  
49  
50  
51  
52  
53  
54  
55  
56  
57  
58  
59  
60

values of 25.4 kg/m<sup>2</sup> for boys and 25.0 kg/m<sup>2</sup> for girls and is equivalent to the overweight cut-off for adults (> 25.0 kg/m<sup>2</sup>), while the +2 SD value (29.7 kg/m<sup>2</sup> for both sexes) compares closely with the cut-off for obesity (> 30.0 kg/m<sup>2</sup>)<sup>15</sup>.

To assess current body weight perception, children were asked to mark whether they thought their body weight or appearance was “too thin” “a little thin”, “normal”, “a little fat”, or “very fat”. Response to a similar question about their child’s body weight or appearance with similar options was filled by parents in a questionnaire sent to their homes. For analysis, ‘very thin’ and ‘a little thin’ were combined for perceived ‘underweight’ and ‘a little fat’ and ‘very fat’ for perceived ‘overweight’.

In addition, children were asked whether they had ever tried to lose weight. If they replied in the affirmative (options: yes/no), the method used to try and lose weight was recorded as “skipping meals”, “stopped eating a certain kind of food”, reduced quantity of food eaten” and “exercise” as a multiple response. Weight loss methods recommended by parents were similarly recorded. The present analysis is restricted to children on whom anthropometric measurements were available and who responded to the question on weight loss and this corresponds to 1874 participants (871 boys, 1003 girls).

### **Statistical analysis:**

Data are reported as number and percentages for all the categorical variables. For analysis, socio-demographic variables of age of children were categorized as 10 and below and above 10 years of age, language of instruction as Kannada and English medium (a surrogate of socio-economic status), location as city and non-city (village and small towns) and maternal and paternal education below 7<sup>th</sup> grade and above 7<sup>th</sup> grade.

Cross-tabulations were created of actual weight status of the child with the child’s perception and parent’s perception of their child’s current body weight. Using this, the following six groups were formed

U/U – underweight by actual measurements/perceived by child/parent to be underweight

U/N- underweight by actual measurements/perceived by child/parent to be normal

N/N- normal by actual measurements/perceived by child/parent to be normal

N/O- normal by actual measurements/perceived by child/parent to be overweight

O/N- overweight by actual measurements/perceived by child/parent to be normal

O/O- overweight by actual measurements/perceived by child/parent to be overweight

The referent group was the N/N group.

The association between attempting weight loss with various socio-demographic factors as well with the above six groups was evaluated using the Chi-square test and the unadjusted odds ratio reported. Binary logistic regression was performed to identify the factors associated with attempted weight loss adjusted for socio-demographic variables and actual and perceived weight status of the children. It was also performed to identify the factors associated with trying to lose weight based on groups created using the actual weight status of the child and child's or parent's perception of child's weight adjusted for age, gender and medium of instruction. A level of significance (two-sided) less than 5% was considered statistically significant.

## RESULTS:

Of the 1907 study children, 1874 responded to the question on whether they had ever tried to lose weight. Of these, 65.5% of children were normal weight, 25.0 % underweight and 9.5% overweight. Thirty two percent of children perceived themselves to be underweight; this was 7% more than the actual prevalence of underweight. Similarly, 15.4% perceived themselves to be overweight (5.9% higher than the actual prevalence). In contrast, parents tended to under-estimate underweight (5% lower than the actual prevalence of under-weight).

A total of 35% of children had attempted to lose weight; this constituted 73% of overweight and obese, 35% of normal weight and 22% of underweight children. Sixty eight percent of those children who perceived themselves to be overweight, 32% of those who perceived themselves to be normal, and 23% of those who perceived themselves to be underweight attempted to lose weight. Similarly, 54 % of children whose parents perceived them to be overweight, 35% who perceived them to be normal, and 21% of those who were perceived them to be underweight attempted to lose weight.

Among the socio-demographic factors (Table 1), children in schools with Kannada as the medium of instruction were more likely to attempt to lose weight than those studying in schools with English as the medium of instruction (AOR= 1.57, 95% C.I: 1.11 to 2.25). Underweight children were less likely to try to lose weight (AOR=0.71, 95% C.I: 0.51 to 0.98), while overweight/obese children were more likely (AOR=4.38. 95% C.I: 2.64 to 7.28) to try and lose weight compared to normal weight children. Based on the child's perception of their weight status, those who perceived themselves to be overweight were



1  
2  
3 about 3 times more likely (AOR=2.91, 95% C.I: 1.95 to 4.34) to try to lose weight. Parental  
4 perception of weight status, however, did not have a significant impact on children  
5 attempting to lose weight. Children's (AOR=1.56, 95% C.I: 1.14 to 2.15) and parent's desire  
6 (AOR=1.79, 95% C.I: 1.25 to 2.58) for the child to be thinner also increased the likelihood of  
7 attempting to lose weight.  
8  
9  
10

11  
12 Figure 1 represents the odds of a child attempting to lose weight based on the child's actual  
13 weight status in combination with the child's/parent's perception of weight status After  
14 adjusting for age, gender and medium of instruction, the odds of attempting to lose weight  
15 (Figure 1) increased from 3.1 (95% CI: 2.2 to 4.4) for a normal weight child who perceived  
16 themselves to be overweight/obese, 3.7(95% CI: 2.2 to 6.2) for an overweight child who  
17 perceived themselves to be normal to 18.1 (95% CI: 8.8 to 36.9) for an overweight child who  
18 perceived themselves to be overweight. A similar trend was observed when parental  
19 perceptions were replaced with child's perception (Figure 1) with odds of attempting to lose  
20 weight increasing from 1.7 (95% CI: 1.1 to 2.7) for normal weight child perceived by a  
21 parent to be overweight, 4.7 (95% CI: 2.7 to 8.0) for an overweight child perceived by a  
22 parent to be normal to 19.3(95% CI: 6.8 to 54.8) for an overweight child perceived to be  
23 overweight by a parent. None of the underweight children were perceived by themselves or  
24 by their parents to be overweight. Among children who were underweight but perceived  
25 either by the child or parent to be underweight or normal, the odds of attempting to lose  
26 weight was reduced by approximately 60% to 40% respectively in relation to children of  
27 normal weight status perceived to be normal by both children and parents. .  
28  
29  
30  
31  
32  
33  
34  
35  
36  
37  
38

39  
40 The most commonly adopted practice to lose weight regardless of whether the children were  
41 underweight, overweight or normal was exercise (~46%), followed by reducing the quantity  
42 of food intake, ceasing to eat certain kinds of foods and skipping meals (Figure 2).  
43  
44

#### 45 **DISCUSSION:**

46  
47  
48 In concurrence with the findings of our study, misperception of weight status among children  
49 has been reported in other studies conducted in the United States of America, with  
50 perceptions differing between various ethnic groups. Among African American adolescents,  
51 one-third perceived their weight status inaccurately<sup>8</sup>. Racial or ethnic differences in weight  
52 perception have been reported<sup>8 12 16</sup>, where Caucasians were more likely than African  
53 Americans to perceive themselves as overweight<sup>8 12 17</sup>. Perceptions, however, also governed  
54 their decision to attempt weight loss, notwithstanding their current weight status.  
55  
56  
57  
58  
59  
60

1  
2  
3 In general, children who were actually overweight as well as those who were perceived by  
4 themselves or by their parents to be overweight were highly likely to try to lose weight.  
5 Clearly, perceptions influence their decision to try to lose weight. This finding is similar to  
6 studies conducted in other countries<sup>8 16 18</sup>. Unless individuals or their families perceive their  
7 weight status correctly, their acceptance of programmes designed to encourage healthy  
8 weight may be low<sup>11</sup>. The child's or parent's desire for the child to be thinner also influenced  
9 their decision to try to lose weight.  
10  
11  
12  
13

14  
15 The fact that there were reported weight loss attempts even in the underweight group suggests  
16 that factors other than weight status and weight perception are operative. This is corroborated  
17 by the higher odds of children from Kannada medium schools, who belong to a relatively  
18 lower socio-economic status compared to children from English medium schools (higher  
19 SES) trying to lose weight. Thus socio-cultural factors may also influence their decision to  
20 lose weight. This could be linked to the continuous exposure to images and unrealistic body  
21 shapes that encourage weight loss regardless of body weight<sup>16</sup>. These factors must be further  
22 explored so that suitable programmes that encourage overweight children but not  
23 underweight or normal children to lose weight are planned.  
24  
25  
26  
27  
28  
29  
30

31 Included in our sample were children as young as 8 years of age. However, body  
32 dissatisfaction with increasing weight status was established even by the age of 5 in both  
33 boys and girls of South Asian origin in UK<sup>2</sup>. Irrespective of whether they were below or  
34 above 10 years of age or whether they were boys or girls, children attempted to lose weight.  
35 In our study sample, there were no gender differences in weight loss attempts. This is  
36 contrary to the findings elsewhere, as for instance, the NHANES study<sup>10</sup>, which indicated  
37 that girls were about 2 ½ times more likely to attempt to lose weight. The absence of gender  
38 differences in our study may, in part, be due to the relatively low prevalence of overweight or  
39 obesity.  
40  
41  
42  
43  
44  
45  
46

47 It is encouraging that 46 % children indicated exercise their preferred choice of weight loss.  
48 Differences in the methods used to lose weight between overweight, normal and underweight  
49 children were not apparent unlike other studies where unhealthier weight loss methods like  
50 skipping meals are reported more in overweight or obese children compared to normal weight  
51 children<sup>19</sup>. However, an effect of social desirability cannot be discounted, given that exercise  
52 as a healthy lifestyle choice is promoted early in the school curriculum  
53  
54  
55  
56  
57  
58  
59  
60

1  
2  
3 Body image must be taken into account when designing programmes to improve both body  
4 image and reduce unhealthy behaviours like unhealthy eating and reduced or excessive  
5 exercise <sup>1</sup>. Since public health programmes are generally targeted towards all, a general  
6 programme that caters to all children irrespective of their weight status is required.  
7  
8

9  
10 **Strengths and limitations:** This is the first study to report perceptions of body weight in  
11 India in relation to weight loss attempts. With the cross-sectional study design used in this  
12 study, the changes in perception as the children grow cannot be accounted for.  
13  
14

15  
16 Overall, perceptions of weight status influenced the decision of children to lose weight.  
17 However, regardless of weight status, many children did resort to weight loss. Public health  
18 campaigns should emphasize healthy weight management rather than weight loss.  
19  
20

21  
22 *Acknowledgements:* The authors thank Dr. Roopashree who helped in acquisition and entry  
23 of part of the data.  
24  
25

26  
27  
28 *Contributors:* MP, SS and MV were responsible for the concept and design of the study. SS  
29 drafted and the manuscript. MP acquired the data. Sumithra Selvam (SRS) performed the  
30 statistical analysis and interpreted the data. MV conceived the study and interpreted the data.  
31 All authors revised the manuscript critically for important intellectual content. SS is the  
32 guarantor.  
33  
34

35  
36  
37 *Funding:* This research received no specific grant from any funding agency in the public,  
38 commercial or not-for-profit sectors.  
39  
40

41  
42 *Competing interests:* All authors have completed the Unified Competing Interest form at  
43 [www.icmje.org/coi\\_disclosure.pdf](http://www.icmje.org/coi_disclosure.pdf) (available on request from the corresponding author) and  
44 declare no support from any organisation for the submitted work; no financial relationships  
45 with any organisations that might have an interest in the submitted work in the previous 3  
46 years/ no other relationships or activities that could appear to have influence the submitted  
47 work.  
48  
49

50  
51  
52 The Corresponding Author has the right to grant on behalf of all authors and does grant on  
53 behalf of all authors, an exclusive licence (or non exclusive for government employees) on a  
54 worldwide basis to the BMJ Publishing Group Ltd and its Licensees to permit this article (if  
55 accepted) to be published in BMJ editions and any other BMJ PGL products and sub-licences  
56  
57  
58  
59

1  
2  
3  
4  
5  
6  
7  
8  
9  
10  
11  
12  
13  
14  
15  
16  
17  
18  
19  
20  
21  
22  
23  
24  
25  
26  
27  
28  
29  
30  
31  
32  
33  
34  
35  
36  
37  
38  
39  
40  
41  
42  
43  
44  
45  
46  
47  
48  
49  
50  
51  
52  
53  
54  
55  
56  
57  
58  
59  
60

to exploit all subsidiary rights, as set out in your licence (  
<http://resources.bmj.com/bmj/authors/checklists-forms/licence-for-publication>)

**Data sharing:**

Raw data are available from the statistician, Sumithra Selvam on request.

For peer review only

**References:**

1. Grogan S. Body image and health: contemporary perspectives. *J Health Psychol* 2006;11(4):523-30.
2. Pallan MJ, Hiam LC, Duda JL, Adab P. Body image, body dissatisfaction and weight status in South Asian children: a cross-sectional study. *BMC Public Health* 2011;11:21.
3. Maximova K, McGrath JJ, Barnett T, O'Loughlin J, Paradis G, Lambert M. Do you see what I see? Weight status misperception and exposure to obesity among children and adolescents. *Int J Obes (Lond)* 2008;32(6):1008-15.
4. Ceballos N, Czyzewska M. Body image in Hispanic/Latino vs. European American adolescents: implications for treatment and prevention of obesity in underserved populations. *J Health Care Poor Underserved* 2010;21(3):823-38.
5. Ayala GX, Mickens L, Galindo P, Elder JP. Acculturation and body image perception among Latino youth. *Ethn Health* 2007;12(1):21-41.
6. Haff HR. Racial/Ethnic differences in weight perceptions and weight control behaviors among adolescent females. *Youth & Society* 2009;41(2):278-301.
7. Swami V, Frederick DA, Aavik T, Alcalay L, Allik J, Anderson D, et al. The attractive female body weight and female body dissatisfaction in 26 countries across 10 world regions: results of the international body project I. *Pers Soc Psychol Bull* 2010;36(3):309-25.
8. Wang Y, Liang H, Chen X. Measured body mass index, body weight perception, dissatisfaction and control practices in urban, low-income African American adolescents. *BMC Public Health* 2009;9:183.
9. Ojala K, Vereecken C, Valimaa R, Currie C, Villberg J, Tynjala J, et al. Attempts to lose weight among overweight and non-overweight adolescents: a cross-national survey. *Int J Behav Nutr Phys Act* 2007;4:50.
10. Yan AF, Zhang G, Wang MQ, Stoesen CA, Harris BM. Weight perception and weight control practice in a multiethnic sample of US adolescents. *South Med J* 2009;102(4):354-60.
11. Edwards NM, Pettingell S, Borowsky IW. Where perception meets reality: self-perception of weight in overweight adolescents. *Pediatrics* 2010;125(3):e452-8.
12. Martin MA, May AL, Frisco ML. Equal weights but different weight perceptions among US adolescents. *J Health Psychol* 2010;15(4):493-504.
13. Viner RM, Haines MM, Taylor SJ, Head J, Booy R, Stansfeld S. Body mass, weight control behaviours, weight perception and emotional well being in a multiethnic sample of early adolescents. *Int J Obes (Lond)* 2006;30(10):1514-21.
14. Pauline M, Selvam S, Swaminathan S, Vaz M. Body weight perception is associated with socio-economic status and current body weight in selected urban and rural South Indian school-going children. *Public Health Nutr* 2012:1-9.
15. de Onis M, Onyango AW, Borghi E, Siyam A, Nishida C, Siekmann J. Development of a WHO growth reference for school-aged children and adolescents. *Bull World Health Organ* 2007;85(9):660-7.
16. Duncan JS, Duncan EK, Schofield G. Associations between weight perceptions, weight control and body fatness in a multiethnic sample of adolescent girls. *Public Health Nutr* 2010;14(1):93-100.
17. Neff LJ, Sargent RG, McKeown RE, Jackson KL, Valois RF. Black-white differences in body size perceptions and weight management practices among adolescent females. *J Adolesc Health* 1997;20(6):459-65.
18. Alwan H, Viswanathan B, Paccaud F, Bovet P. Is Accurate Perception of Body Image Associated with Appropriate Weight-Control Behavior among Adolescents of the Seychelles. *J Obes* 2011;2011:817242.
19. Boutelle K, Neumark-Sztainer D, Story M, Resnick M. Weight control behaviors among obese, overweight, and nonoverweight adolescents. *J Pediatr Psychol* 2002;27(6):531-40.

1  
2  
3  
4  
5  
6  
7  
8  
9  
10  
11  
12  
13  
14  
15  
16  
17  
18  
19  
20  
21  
22  
23  
24  
25  
26  
27  
28  
29  
30  
31  
32  
33  
34  
35  
36  
37  
38  
39  
40  
41  
42  
43  
44  
45  
46  
47  
48  
49

Table 1. Socio-economic and anthropometric associations of weight loss behaviour

|                                | Attempted weight loss |           | Unadjusted OR | P value*            | Adjusted † OR | P value‡            |      |
|--------------------------------|-----------------------|-----------|---------------|---------------------|---------------|---------------------|------|
|                                | Yes                   | No        | 95% C.I.      |                     | 95% C.I.      |                     |      |
| Gender                         |                       |           |               |                     |               |                     |      |
|                                | Female                | 387 (39%) | 616 (61%)     | 1.41<br>1.16 – 1.72 | <0.001        | 1.16<br>0.89 – 1.51 | 0.27 |
|                                | Male                  | 268 (31%) | 603 (69%)     | 1                   | 1             |                     |      |
| Age category (years)           |                       |           |               |                     |               |                     |      |
|                                | <=10                  | 245 (34%) | 469 (66%)     | 0.96<br>0.78 – 1.17 | 0.65          | 1.04<br>0.79 – 1.36 | 0.76 |
|                                | >10                   | 410 (35%) | 750 (65%)     | 1                   |               | 1                   |      |
| Location                       |                       |           |               |                     |               |                     |      |
|                                | City                  | 408 (33%) | 812 (67%)     | 0.83<br>0.68 – 1.01 | 0.06          | 1.03<br>0.78 – 1.36 | 0.81 |
|                                | Non City              | 247 (38%) | 407 (62%)     | 1                   |               | 1                   |      |
| Education of mother (Standard) |                       |           |               |                     |               |                     |      |
|                                | Up to 7 <sup>th</sup> | 146 (34%) | 278 (66%)     | 0.95<br>0.75 – 1.22 | 0.69          | 0.81<br>0.58 – 1.14 | 0.22 |
|                                | > 7 <sup>th</sup>     | 400 (36%) | 727 (65%)     | 1                   |               | 1                   |      |
| Education of father (Standard) |                       |           |               |                     |               |                     |      |
|                                | Up to 7 <sup>th</sup> | 161 (39%) | 256 (61%)     | 1.21<br>0.95 – 1.53 | 0.10          | 1.24<br>0.87-1.78   | 0.22 |
|                                | > 7 <sup>th</sup>     | 437 (34%) | 838 (66%)     | 1                   |               | 1                   |      |
| Medium of instruction          |                       |           |               |                     |               |                     |      |
|                                | Kannada               | 198 (39%) | 308 (61%)     | 1.28<br>1.03- 1.59  | 0.02          | 1.57<br>1.11 – 2.25 | 0.01 |
|                                | English <sup>1</sup>  | 457(33%)  | 911 (67%)     | 1                   |               | 1                   |      |

|                                           |           |           |             |        |             |        |  |
|-------------------------------------------|-----------|-----------|-------------|--------|-------------|--------|--|
| Actual weight status                      |           |           |             |        |             |        |  |
| Underweight                               | 98 (22%)  | 352 (78%) | 0.52        | <0.001 | 0.71        | 0.04   |  |
|                                           |           |           | 0.40 – 0.67 |        | 0.51 – 0.98 |        |  |
| Overweight                                | 125 (73%) | 47 (27%)  | 4.96        | <0.001 | 4.38        | <0.001 |  |
|                                           |           |           | 3.43 – 7.20 |        | 2.64 – 7.28 |        |  |
| Normal                                    | 412 (35%) | 769 (65%) | 1           |        | 1           |        |  |
| Child's perception of body image          |           |           |             |        |             |        |  |
| Too /A little Thin                        | 133 (23%) | 457 (77%) | 0.61        | <0.001 | 0.67        | 0.01   |  |
|                                           |           |           | 0.48 – 0.77 |        | 0.49 – 0.93 |        |  |
| A little /Too fat                         | 195 (68%) | 91 (32%)  | 4.48        | <0.001 | 2.91        | <0.001 |  |
|                                           |           |           | 3.35 – 6.00 |        | 1.95 – 4.34 |        |  |
| Normal                                    | 318 (32%) | 665 (68%) | 1           |        | 1           |        |  |
| Child's desire to be                      |           |           |             |        |             |        |  |
| A lot /Slightly fatter                    | 114 (25%) | 347 (75%) | 0.76        | 0.03   | 0.84        | 0.35   |  |
|                                           |           |           | 0.58 – 0.98 |        | 0.59 – 1.20 |        |  |
| Slightly/Much thinner                     | 260(52%)  | 237 (48%) | 2.53        | <0.001 | 1.56        | 0.006  |  |
|                                           |           |           | 2.00 – 3.19 |        | 1.14 – 2.15 |        |  |
| Same as at present                        | 272 (30%) | 627 (70%) | 1           |        | 1           |        |  |
| Parent's perception of child's body image |           |           |             |        |             |        |  |
| Too /A little Thin                        | 66 (22%)  | 241 (79%) | 0.52        | <0.001 | 0.76        | 0.15   |  |
|                                           |           |           | 0.38 – 0.71 |        | 0.52 – 1.12 |        |  |
| A little /Too fat                         | 95 (54%)  | 82 (46%)  | 2.20        | <0.001 | 0.86        | 0.51   |  |
|                                           |           |           | 1.58 – 3.08 |        | 0.51 – 1.37 |        |  |
| Normal                                    | 364 (35%) | 690 (66%) | 1           |        | 1           |        |  |
| Parent's desire for child to be           |           |           |             |        |             |        |  |
| A lot /Slightly fatter                    | 87 (21%)  | 331 (79%) | 0.54        | <0.001 | 0.75        | 0.11   |  |
|                                           |           |           | 0.41- 0.72  |        | 0.52 – 1.07 |        |  |
| Slightly /Much thinner                    | 170 (56%) | 134 (44%) | 2.61        | <0.001 | 1.79        | 0.002  |  |
|                                           |           |           | 1.98 – 3.46 |        | 1.25 – 2.58 |        |  |
| Same as at present                        | 263 (33%) | 542 (67%) | 1           |        | 1           |        |  |

Results are reported as Number (percentages); OR – Odds Ratio; 95% C.I. – 95% Confidence Interval

\*Fisher's Exact test or Chi square test

† Adjusted for actual BMI status, child's and parents perception of body weight and socio-demographic factors

‡ Obtained by fitting binary logistic regression models

1  
2  
3  
4  
5  
6  
7  
8 **Figure Legends:**  
9

10 **Figure 1: Odds ratio of having tried to lose body weight in children classified by current**  
11 **weight status and perception of body weight.** ■ Comparison of child's actual weight  
12 status with child's perception of weight status □ Comparison of child's actual weight  
13 status with parental perception of weight status. U/U: underweight by actual  
14 measurements/child's or parent's perception of being underweight, U/N: underweight by  
15 actual measurements/child's or parent's perception of being normal, N/N: normal by actual  
16 measurements/child's or parent's perception of being normal, N/O: normal by actual  
17 measurements/child's or parent's perception of being overweight, O/N: overweight by actual  
18 measurements/child's or parent's perception of being normal, O/O: overweight by actual  
19 measurements/child's or parent's perception of being overweight.  
20  
21  
22  
23

24 **Figure 2: Actual weight status and weight loss practices of children**

25 ■ Exercise ■ Reduced quantity of food eaten □ Stopped eating certain kind of foods  
26 □ Skipping meals  
27  
28  
29  
30  
31  
32  
33  
34  
35  
36  
37  
38  
39  
40  
41  
42  
43  
44  
45  
46  
47  
48  
49  
50  
51  
52  
53  
54  
55  
56  
57  
58  
59  
60



Figure 1: Odds ratio of attempting to lose body weight in children classified by current weight status and children and parental perception of body weight

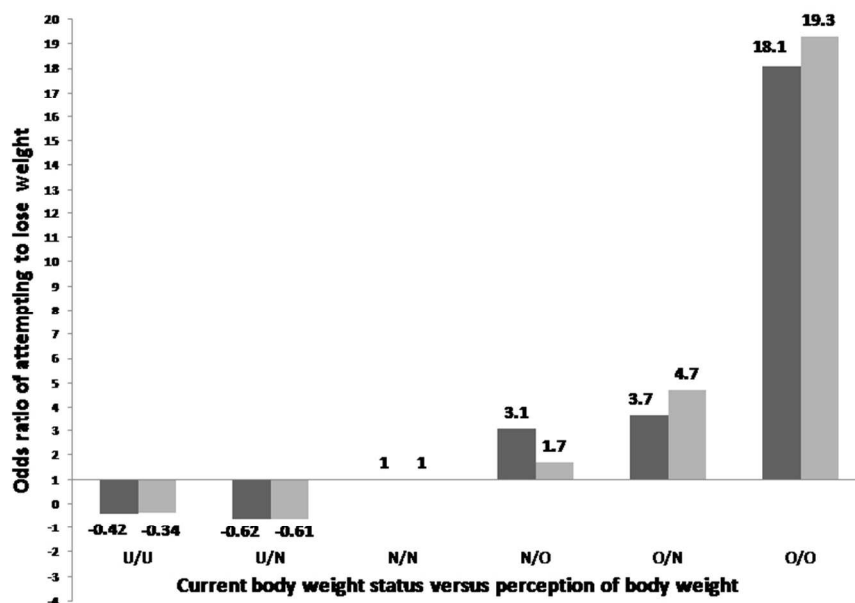

Figure 1: Odds ratio of having tried to lose body weight in children classified by current weight status and perception of body weight. Comparison of child's actual weight status with child's perception of weight status. Comparison of child's actual weight status with parental perception of weight status. U/U: underweight by actual measurements/child's or parent's perception of being underweight, U/N: underweight by actual measurements/child's or parent's perception of being normal, N/N: normal by actual measurements/child's or parent's perception of being normal, N/O: normal by actual measurements/child's or parent's perception of being overweight, O/N: overweight by actual measurements/child's or parent's perception of being normal, O/O: overweight by actual measurements/child's or parent's perception of being overweight.

254x190mm (96 x 96 DPI)

only

1  
2  
3  
4  
5  
6  
7  
8  
9  
10  
11  
12  
13  
14  
15  
16  
17  
18  
19  
20  
21  
22  
23  
24  
25  
26  
27  
28  
29  
30  
31  
32  
33  
34  
35  
36  
37  
38  
39  
40  
41  
42  
43  
44  
45  
46  
47  
48  
49  
50  
51  
52  
53  
54  
55  
56  
57  
58  
59  
60

Figure 2: Actual weight status and weight loss practices of children

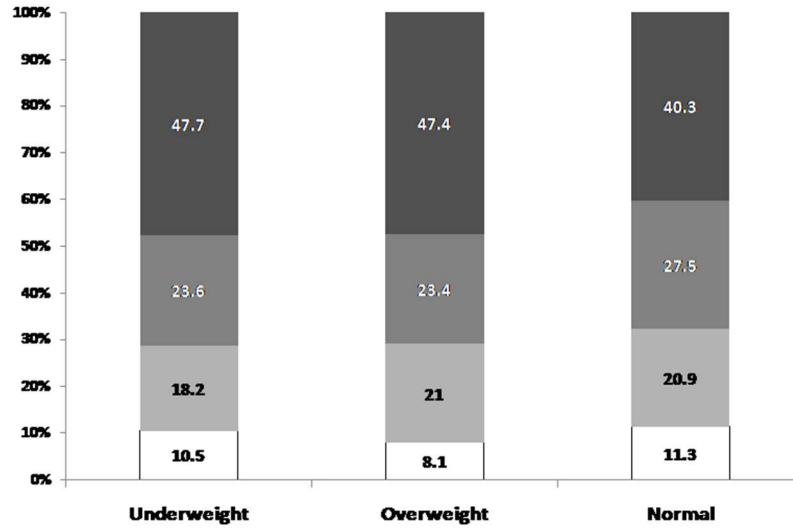

Figure 2: Actual weight status and weight loss practices of children

Exercise      Reduced quantity of food eaten      Stopped eating certain kind of foods meals      Skipping

254x190mm (96 x 96 DPI)

For peer review only

(Supplementary) Table 2: Odds ratio of attempting to lose weight in comparison to actual weight status of the children and the child's perception of body weight

| Actual BMI       | Child's Perception of body weight | Attempted weight loss |     | Unadjusted OR<br>95% C.I. | P value* | Adjusted†<br>OR<br>95% C.I. | P value‡ |
|------------------|-----------------------------------|-----------------------|-----|---------------------------|----------|-----------------------------|----------|
|                  |                                   | Yes                   | No  |                           |          |                             |          |
| Normal           | Overweight/Obese                  | 105                   | 67  | 3.1<br>2.22 – 4.58        | <0.001   | 3.1<br>2.2 -4.42            | <0.001   |
| Overweight/Obese | Overweight/Obese                  | 74                    | 9   | 16.7<br>7.93 – 36.54      | <0.001   | 18.1<br>8.8 -36.9           | <0.001   |
| Overweight/Obese | Normal                            | 43                    | 25  | 3.5<br>2.03 – 6.08        | <0.001   | 3.7<br>2.2 – 6.2            | <0.001   |
| Underweight      | Underweight                       | 19                    | 95  | 0.41<br>0.23 – 0.70       | <0.001   | 0.42<br>0.25-0.70           | 0.001    |
| Underweight      | Normal                            | 67                    | 226 | 0.60<br>0.43 – 0.84       | 0.001    | 0.62<br>0.45 – 0.86         | 0.004    |
| Normal           | Normal                            | 219                   | 446 | 1                         |          | 1                           |          |

Results are reported as Number and %; OR – Odds Ratio; 95% C.I. – 95% Confidence Interval

\*Fisher's Exact test or Chi square test

†Adjusted for age, gender and medium of instruction

‡‡ Obtained by fitting binary logistic regression models

(Supplementary) Table 3: Odds ratio of attempting to lose weight in comparison to actual weight status of the children and the parent's perception of child's body weight

| Actual BMI status of the children | Parent's Perception of body weight | Attempted weight loss |     | Unadjusted OR<br>95% C.I. | P Value* | Adjusted †<br>OR<br>95% C.I. | P value‡ |
|-----------------------------------|------------------------------------|-----------------------|-----|---------------------------|----------|------------------------------|----------|
|                                   |                                    | Yes                   | No  |                           |          |                              |          |
| Normal                            | Overweight/Obese                   | 43                    | 47  | 1.69<br>1.07 – 2.69       | 0.01     | 1.74<br>1.1 – 2.7            | 0.01     |
| Overweight/Obese                  | Overweight/Obese                   | 40                    | 4   | 18.5<br>6.25 – 61.63      | <0.001   | 19.3<br>6.8- 54.8            | <0.001   |
| Overweight/Obese                  | Normal                             | 50                    | 21  | 4.4<br>2.52 – 7.77        | <0.001   | 4.7<br>2.7 – 8.0             | <0.001   |
| Underweight                       | Underweight                        | 18                    | 102 | 0.33<br>0.19 – 0.57       | <0.001   | 0.34<br>0.20 – 0.57          | <0.001   |
| Underweight                       | Normal                             | 58                    | 181 | 0.59<br>0.42 – 0.84       | 0.001    | 0.61<br>0.44 – 0.86          | 0.004    |
| Normal                            | Normal                             | 257                   | 476 | 1                         |          | 1                            |          |

Results are reported as Number and %; OR – Odds Ratio; 95% C.I. – 95% Confidence Interval

\* Fisher's Exact test or Chi square test

†Adjusted for age, gender and medium of instruction

‡‡ Obtained by fitting binary logistic regression models

STROBE 2007 (v4) Statement—Checklist of items that should be included in reports of *cross-sectional studies*

| Section/Topic             | Item # | Recommendation                                                                                                                                                                       | Reported on page #    |
|---------------------------|--------|--------------------------------------------------------------------------------------------------------------------------------------------------------------------------------------|-----------------------|
| Title and abstract        | 1      | (a) Indicate the study’s design with a commonly used term in the title or the abstract                                                                                               | 2                     |
|                           |        | (b) Provide in the abstract an informative and balanced summary of what was done and what was found                                                                                  | 2                     |
| <b>Introduction</b>       |        |                                                                                                                                                                                      |                       |
| Background/rationale      | 2      | Explain the scientific background and rationale for the investigation being reported                                                                                                 | 3 and 4               |
| Objectives                | 3      | State specific objectives, including any prespecified hypotheses                                                                                                                     | 4                     |
| <b>Methods</b>            |        |                                                                                                                                                                                      |                       |
| Study design              | 4      | Present key elements of study design early in the paper                                                                                                                              | 4                     |
| Setting                   | 5      | Describe the setting, locations, and relevant dates, including periods of recruitment, exposure, follow-up, and data collection                                                      | 4                     |
| Participants              | 6      | (a) Give the eligibility criteria, and the sources and methods of selection of participants                                                                                          | 4                     |
| Variables                 | 7      | Clearly define all outcomes, exposures, predictors, potential confounders, and effect modifiers. Give diagnostic criteria, if applicable                                             | 4 and 5               |
| Data sources/ measurement | 8*     | For each variable of interest, give sources of data and details of methods of assessment (measurement). Describe comparability of assessment methods if there is more than one group | 4 and 5               |
| Bias                      | 9      | Describe any efforts to address potential sources of bias                                                                                                                            | <i>Not applicable</i> |
| Study size                | 10     | Explain how the study size was arrived at                                                                                                                                            | 4                     |
| Quantitative variables    | 11     | Explain how quantitative variables were handled in the analyses. If applicable, describe which groupings were chosen and why                                                         | 5                     |
| Statistical methods       | 12     | (a) Describe all statistical methods, including those used to control for confounding                                                                                                | 5 and 6               |
|                           |        | (b) Describe any methods used to examine subgroups and interactions                                                                                                                  | 5 and 6               |
|                           |        | (c) Explain how missing data were addressed                                                                                                                                          | Not applicable        |
|                           |        | (d) If applicable, describe analytical methods taking account of sampling strategy                                                                                                   | -                     |
|                           |        | (e) Describe any sensitivity analyses                                                                                                                                                | Not applicable        |
| <b>Results</b>            |        |                                                                                                                                                                                      |                       |

1  
2  
3  
4  
5  
6  
7  
8  
9  
10  
11  
12  
13  
14  
15  
16  
17  
18  
19  
20  
21  
22  
23  
24  
25  
26  
27  
28  
29  
30  
31  
32  
33  
34  
35  
36  
37  
38  
39  
40  
41  
42  
43  
44  
45  
46  
47  
48  
49

|                          |     |                                                                                                                                                                                                              |                |
|--------------------------|-----|--------------------------------------------------------------------------------------------------------------------------------------------------------------------------------------------------------------|----------------|
| Participants             | 13* | (a) Report numbers of individuals at each stage of study—eg numbers potentially eligible, examined for eligibility, confirmed eligible, included in the study, completing follow-up, and analysed            | 5              |
|                          |     | (b) Give reasons for non-participation at each stage                                                                                                                                                         | 5              |
|                          |     | (c) Consider use of a flow diagram                                                                                                                                                                           | Not used       |
| Descriptive data         | 14* | (a) Give characteristics of study participants (eg demographic, clinical, social) and information on exposures and potential confounders                                                                     | 5              |
|                          |     | (b) Indicate number of participants with missing data for each variable of interest                                                                                                                          | 5              |
| Outcome data             | 15* | Report numbers of outcome events or summary measures                                                                                                                                                         | 5 and 6        |
| Main results             | 16  | (a) Give unadjusted estimates and, if applicable, confounder-adjusted estimates and their precision (eg, 95% confidence interval). Make clear which confounders were adjusted for and why they were included | 6,7,12,13      |
|                          |     | (b) Report category boundaries when continuous variables were categorized                                                                                                                                    | 5              |
|                          |     | (c) If relevant, consider translating estimates of relative risk into absolute risk for a meaningful time period                                                                                             | Not applicable |
| Other analyses           | 17  | Report other analyses done—eg analyses of subgroups and interactions, and sensitivity analyses                                                                                                               | Not applicable |
| <b>Discussion</b>        |     |                                                                                                                                                                                                              |                |
| Key results              | 18  | Summarise key results with reference to study objectives                                                                                                                                                     | 7 and 8        |
| Limitations              | 19  | Discuss limitations of the study, taking into account sources of potential bias or imprecision. Discuss both direction and magnitude of any potential bias                                                   | Not applicable |
| Interpretation           | 20  | Give a cautious overall interpretation of results considering objectives, limitations, multiplicity of analyses, results from similar studies, and other relevant evidence                                   | 7, 8 and 9     |
| Generalisability         | 21  | Discuss the generalisability (external validity) of the study results                                                                                                                                        | 9              |
| <b>Other information</b> |     |                                                                                                                                                                                                              |                |
| Funding                  | 22  | Give the source of funding and the role of the funders for the present study and, if applicable, for the original study on which the present article is based                                                | 9              |

\*Give information separately for cases and controls in case-control studies and, if applicable, for exposed and unexposed groups in cohort and cross-sectional studies.

**Note:** An Explanation and Elaboration article discusses each checklist item and gives methodological background and published examples of transparent reporting. The STROBE checklist is best used in conjunction with this article (freely available on the Web sites of PLoS Medicine at <http://www.plosmedicine.org/>, Annals of Internal Medicine at <http://www.annals.org/>, and Epidemiology at <http://www.epidem.com/>). Information on the STROBE Initiative is available at [www.strobe-statement.org](http://www.strobe-statement.org).



**BODY WEIGHT PERCEPTION INFLUENCES WEIGHT LOSS BEHAVIOR IN SOUTH INDIAN CHILDREN ACROSS A WIDE BODY WEIGHT RANGE– A CROSS-SECTIONAL STUDY**

|                                 |                                                                                                                                                                                                                                                                                                                                                                                                                         |
|---------------------------------|-------------------------------------------------------------------------------------------------------------------------------------------------------------------------------------------------------------------------------------------------------------------------------------------------------------------------------------------------------------------------------------------------------------------------|
| Journal:                        | <i>BMJ Open</i>                                                                                                                                                                                                                                                                                                                                                                                                         |
| Manuscript ID:                  | bmjopen-2012-002239.R1                                                                                                                                                                                                                                                                                                                                                                                                  |
| Article Type:                   | Research                                                                                                                                                                                                                                                                                                                                                                                                                |
| Date Submitted by the Author:   | 11-Jan-2013                                                                                                                                                                                                                                                                                                                                                                                                             |
| Complete List of Authors:       | Swaminathan, Sumathi; St John's Research Institute, Division of Nutrition<br>Selvam, Sumithra; St John's Research Institute, Department of<br>Epidemiology and Biostatistics<br>Maria, Pauline; St John's Medical College and Hospital, Department of<br>Physiology<br>Vaz, Mario; St John's Medical College and Hospital, Department of<br>Physiology; St John's Research Institute, Division of Humanities and Health |
| <b>Primary Subject Heading</b>: | Public health                                                                                                                                                                                                                                                                                                                                                                                                           |
| Secondary Subject Heading:      | Nutrition and metabolism                                                                                                                                                                                                                                                                                                                                                                                                |
| Keywords:                       | Community child health < PAEDIATRICS, PUBLIC HEALTH, EPIDEMIOLOGY, Cross Sectional Study, INDIA                                                                                                                                                                                                                                                                                                                         |
|                                 |                                                                                                                                                                                                                                                                                                                                                                                                                         |

SCHOLARONE™  
Manuscripts

1  
2  
3 1 BODY WEIGHT PERCEPTION INFLUENCES WEIGHT LOSS BEHAVIOR IN SOUTH  
4 2 INDIAN CHILDREN ACROSS A WIDE BODY WEIGHT RANGE– A CROSS-  
5 3 SECTIONAL STUDY  
6

7  
8 4 Sumathi Swaminathan *Assistant Professor Division of Nutrition*<sup>1</sup>, Sumithra Selvam *Lecturer*  
9 5 *Division of Biostatistics and Epidemiology*<sup>1</sup>, Maria Pauline *Assistant Professor, Department*  
10 6 *of Physiology*<sup>2</sup>, Mario Vaz *Professor Department of Physiology and Division of Humanities*  
11 7 *and Health*<sup>1,2</sup>

12  
13 8 <sup>1</sup>St. John's Research Institute, St John's National Academy of Health Sciences, Koramangala,  
14 9 Bangalore- 560 034, Karnataka, India; <sup>2</sup> St.John's Medical College & Hospital, St. John's  
15 10 National Academy of Health Sciences, Koramangala, Bangalore- 560 034, Karnataka, India  
16  
17  
18  
19  
20  
21  
22  
23

24 14 Correspondence to: Sumathi Swaminathan  
25 15 E-mail: [sumathi@sjri.res.in](mailto:sumathi@sjri.res.in)  
26 16 St John's Research Institute,  
27 17 St John's national Academy of Health Sciences,  
28 18 Koramangala, Bangalore: 560 034  
29 19 Karnataka, India  
30  
31  
32  
33  
34  
35  
36  
37  
38  
39  
40  
41  
42  
43  
44  
45  
46  
47  
48  
49  
50  
51  
52  
53  
54  
55  
56  
57  
58  
59  
60

24 Short title: Body weight perception influences weight loss in South Indian children

1  
2  
3 25  
45 26 **Abstract:**

7 **Objective:** To examine the patterns of weight loss behaviour and the association between  
8 weight loss attempts with actual weight status and children's and parental perceptions of  
9 weight status.  
10

11 **Design:** Cross sectional study  
12

13 **Setting:** Karnataka, South India  
14

15 **Participants:** 1874 girls and boys aged 8 to 14 years from 7 schools in Karnataka, South  
16 India  
17

18 **Main outcome measures:** The association between weight loss attempts and socio-  
19 demographic factors, weight status and the child or parent's perception of weight status.  
20  
21

22 **Results:** Approximately 73% of overweight and obese, 35% of normal weight and 22% of  
23 underweight children attempted to lose weight. Children of lower socio-economic groups  
24 studying in schools in the local vernacular and overweight/obese children were more likely to  
25 attempt to lose weight (Adjusted odds ratio or AOR=1.57, 95% CI: 1.11 to 2.25; AOR= 4.38,  
26 95% CI: 2.64 to 7.28, respectively). Perception of weight status was important in influencing  
27 weight loss attempts. Thus, children who were normal weight but perceived themselves to be  
28 overweight / obese were three times more likely to attempt weight loss compared with those  
29 who accurately perceived themselves as normal weight, while the odds of attempting weight  
30 loss were the highest for those who were overweight and perceived themselves to be so  
31 (AOR ~ 18).  
32  
33  
34  
35

36 **Conclusions:** Children are likely to attempt weight loss in India irrespective of their weight  
37 status, age and gender. Children who were actually overweight as well as those who were  
38 perceived by themselves or by their parents to be overweight or obese were highly likely to  
39 try to lose weight. It is necessary to understand body weight perceptions in communities with  
40 a dual burden of overweight and under-nutrition, if intervention programmes for either are to  
41 be successful.  
42  
43  
44

45 52

46 53  
47  
48  
49  
50  
51  
52  
53  
54  
55  
56  
57  
58  
59  
60



## ARTICLE FOCUS:

- To explore weight loss behaviour patterns and association between weight loss attempts with socio-demographic factors, actual as well as children's and parental perceptions of child's weight status.

## KEY MESSAGES

- In India, where both overweight and underweight in children co-exist, there are no data on the associations of body weight perceptions of children in relation to weight loss attempts. It is essential to understand this association in order to tailor suitable intervention programmes that can work in communities with concurrent under- and over-nutrition.
- Weight loss is attempted by children irrespective of weight status, age and gender. However, there are higher odds of attempting to lose weight among those who perceive themselves to be overweight, although their weight status may be normal.

## STRENGTHS AND LIMITATIONS

- This is the first study to report perceptions of body weight in India in relation to weight loss attempts.
- The cross-sectional study design used in this study, allows only associations to be assessed.

54

55

56

1  
2  
3 57 **INTRODUCTION:**  
4  
5

6 58 Body image is a psycho-social dimension of body size that encompasses both perceptual and  
7 59 attitudinal factors<sup>(1)</sup> and has been associated with eating disorders. In recent years, its  
8 60 association with overweight and obesity has been described <sup>(2)</sup>. It is recognised that  
9 61 individuals make decisions on lifestyle behaviours based on body weight perceptions (a  
10 62 dimension of body image) <sup>(1, 3)</sup>. In India, there is a large burden of under-nutrition alongside  
11 63 increasing overweight and obesity. For public health and clinical programmes to be more  
12 64 effective, body image of undernourished and overweight children should be understood in the  
13 65 context of the influence of culture on body weight perceptions and on weight management  
14 66 behaviours.

15  
16  
17  
18  
19  
20  
21 67 A large number of studies have indicated that children and adolescents misperceive their  
22 68 body weight status. Interventions that address socio-cultural attitudes towards appearance  
23 69 should ideally reduce body image dissatisfaction as well as overweight and obesity since  
24 70 studies have indicated a relationship between body image, unhealthy eating practices and  
25 71 obesity <sup>(4, 5)</sup>. Perceptions of body weight are, in part, influenced by external factors including  
26 72 cultural norms and social preferences as it has been observed that Asian women have less  
27 73 body dissatisfaction than other ethnic groups<sup>(6)</sup>. In India, it is often believed that an  
28 74 overweight person is wealthier and happier and reflects social mobility to a higher status  
29 75 compared to an underweight person, although there are no studies to corroborate this. The  
30 76 disconnect between actual weight and perception of body size could stem from the extent to  
31 77 which individuals identify with the majority cultural standards of beauty<sup>(7)</sup>. There are also  
32 78 reports that individuals in less socio-economically developed societies positively evaluate  
33 79 overweight and obese figures <sup>(8)</sup>. Evidence also suggests associations of actual body weight,  
34 80 body weight perceptions and weight dissatisfaction with weight control practices; overweight  
35 81 children are more likely to try to lose weight compared to non-overweight children <sup>(9,</sup>  
36 82 <sup>10)</sup>. Analysis of data from the National Health and Nutrition Examination Survey (NHANES)  
37 83 <sup>(11)</sup> and the Youth Risk Behaviour Surveillance Survey (YRBSS) <sup>(7, 12)</sup> indicate that those  
38 84 overweight children who perceived their weight status correctly were more likely to exercise  
39 85 or eat less for weight control. Results from an analysis from Europe, Israel and North  
40 86 America as part of the Health Behaviour in School aged Children (HBSC) 2001/2002 survey  
41 87 indicated that weight status perception of weight and age were significant factors influencing  
42 88 current attempt to lose weight <sup>(10)</sup>.

1  
2  
3 89 For healthy weight management it is necessary for a person to perceive his or her weight  
4 90 status accurately as well as be aware of healthy methods to lose or gain weight. Most  
5 91 literature on body weight perceptions and weight control behaviours are related to studies  
6 92 done in developed countries<sup>(7, 9, 11, 13)</sup> with a few on ethnic minorities, including South Asians  
7 93<sup>(2, 14)</sup>. The present analysis aims to examine the associations between the actual weight  
8 94 status, body weight perceptions of both children and their parents, and body weight  
9 95 satisfaction with weight loss intentions. The study sample included a wide range of body  
10 96 weights to reflect the dual burden of under-nutrition and overweight/obesity that India  
11 97 currently faces.

## 18 98 **METHODS:**

### 20 99 **Study population:**

21 100 A total of 2083 school children aged 8 to 14 years from 7 schools of varying socio-  
22 101 economic status located in rural areas, towns in Karnataka and urban Bangalore in South  
23 102 India, were contacted at baseline out of which 1907 (91.6%) children participated in a  
24 103 longitudinal study on body image perceptions and growth indices of school children, details  
25 104 of which are published earlier<sup>(15)</sup>. Convenience sampling of 7 city and non-city (rural and  
26 105 small towns) co-educational, non-residential schools was employed, such that children  
27 106 representing various socio-economic statuses (based on school fees linked to medium of  
28 107 instruction) were recruited. Of these schools, 2 were located in villages, 3 in small towns and  
29 108 2 in Bangalore city. The schools in which Kannada, the regional state language, was the  
30 109 language of instruction, received government support and had annual tuition fees of Rs.250 to  
31 110 500 whereas English medium schools did not receive government support and had annual  
32 111 tuition fees of above Rs.6000. Hence the medium of instruction in schools was used as an  
33 112 indicator of socio-economic status (SES). Three schools (1 each in a village, small town and  
34 113 city) had Kannada as the medium of instruction while four schools (1 in a village, 2 in small  
35 114 towns and 1 in the city) had English as the medium of instruction.

36  
37  
38  
39  
40  
41  
42  
43  
44  
45  
46  
47  
48  
49  
50 115 The sample recruited had adequate power (above 80 %) to identify the significant socio-  
51 116 demographic predictors for perception of body image in the present study and to estimate a  
52 117 difference of at least 10% over-estimation or under-estimation of body weight at 5% level of  
53 118 significance. Ethical approval was obtained from the Institutional Ethical Review Board.

1  
2  
3 119 Principals of schools were contacted for permission to conduct the study in their schools.  
4  
5 120 Written parental consent and assent from the child was also obtained.. A questionnaire to  
6  
7 121 assess body image perception was administered by an investigator (MP) to all the consenting  
8  
9 122 students in a class by reading aloud the questions in either English or Kannada (the local  
10  
11 123 language). Responses were marked on the questionnaire by each child. A short questionnaire  
12  
13 124 in English or the local language to be filled by one of the parents was sent home after the  
14  
15 125 children completed their questionnaires. Children whose parents were illiterate (6.7%  
16  
17 126 mothers, 5.9% fathers), elicited the answers from either of their parents and filled up the  
18  
19 127 questionnaire.

### 128 **Measurements:**

20  
21 129 Height was measured using a fibreglass tape without foot wear to 0.2 cm. Weight was  
22  
23 130 measured in school uniforms but without shoes using a calibrated digital scale (Home Health,  
24  
25 131 Model 8604, Dr. Morepen Lab, Hong Kong) to the nearest 100 gm. All measurements were  
26  
27 132 made using a standardized protocol. Body mass index (BMI) was computed and the BMI-  
28  
29 133 for-age z score values were obtained using the World Health Organization Anthroplus  
30  
31 134 software version 1.0.2 (WHO, Geneva, Switzerland). Children were then categorized by  
32  
33 135 actual weight status as overweight ( $>+1$  SD), normal ( $< -2$  to  $+1$ ) and underweight ( $< -2$   
34  
35 136 SD). These values at 19 years of age, at  $+1$  standard deviation (SD) correspond to the BMI  
36  
37 137 values of  $25.4 \text{ kg/m}^2$  for boys and  $25.0 \text{ kg/m}^2$  for girls and is equivalent to the overweight  
38  
39 138 cut-off for adults ( $> 25.0 \text{ kg/m}^2$ ), while the  $+2$  SD value ( $29.7 \text{ kg/m}^2$  for both sexes) compares  
40  
41 139 closely with the cut-off for obesity ( $> 30.0 \text{ kg/m}^2$ )<sup>(16)</sup>.

42  
43 140 To assess current body weight perception, children were asked to mark whether they  
44  
45 141 thought their body weight or appearance was “too thin”, “a little thin”, “normal”, “a little  
46  
47 142 fat”, or “very fat”. Response to a similar identical question about their child’s body weight or  
48  
49 143 appearance with similar options was filled by parents in a questionnaire sent to their homes.  
50  
51 144 For analysis, “very thin” and “a little thin” were combined as “too/little thin” and “a little fat”  
52  
53 145 and ‘very fat’ were combined as “a little/too fat” and “normal” remained “normal”.

54  
55 146 To assess perceptions on desired (ideal) body weight, children responded to the  
56  
57 147 question “I want to be” with options “a lot fatter”, “slightly fatter”, “as I am at present”,  
58  
59 148 “slightly thinner”, “much thinner”. The first 2 options were clubbed as “a lot/slightly fatter”,  
60  
149 “as I am at present” as “same as at present” and the last 2 options clubbed as “slightly/much  
150 thinner. Parents responded to a similar question on “I want my child to be” with an identical

1  
2  
3 151 set of options. For analysis, clubbing of the options for parents desired body weight for their  
4  
5 152 child was also done in a similar manner.  
6

7 153 The Stunkard's silhouettes<sup>(17)</sup> were also used to assess body image perception in  
8  
9 154 children and this was also administered in the classroom. In order to make comparisons with  
10  
11 155 the body weight perception questions, the nine images were regrouped to reflect the 3  
12  
13 156 categories of weight status as underweight, normal and overweight. The agreement between  
14  
15 157 the perceived visual image and the body weight perception obtained by questions of current  
16  
17 158 weight status, evaluated using kappa statistics ranged from 0.23 to 0.53. A fair agreement  
18  
19 159 between underweight/fat and normal, and a moderate agreement between both the extremes  
20  
21 160 of weight (underweight versus overweight) was seen. There were no gender differences in  
22  
23 161 agreement. Parental perceptions of the body weight were assessed using structured questions  
24  
25 162 only, and since this was available both for the parent and the child, further analyses were  
26  
27 163 done using the questions only.

28 164 In addition, children were asked whether they had ever tried to lose weight. If they  
29  
30 165 replied in the affirmative (options: yes/no), the method used to try and lose weight was  
31  
32 166 recorded as "skipping meals", "stopped eating a certain kind of food", reduced quantity of  
33  
34 167 food eaten" and "exercise" as a multiple response. Weight loss methods recommended by  
35  
36 168 parents were similarly recorded.

37 169 The present analysis is restricted to children on whom anthropometric measurements were  
38  
39 170 available and who responded to the question on weight loss and this corresponds to 1874  
40  
41 171 participants (871 boys, 1003 girls). The response rate (of a total of 1907 children) was 98.3%;  
42  
43 172 socio-demographic (age, gender, medium of instruction) characteristics between the  
44  
45 173 responders and non responders were comparable.  
46

47 174

#### 48 175 **Statistical analysis:**

49  
50 176 Data are reported as number and percentages for all the categorical variables. For analysis,  
51  
52 177 socio-demographic variables of age of children were categorized as 10 and below and above  
53  
54 178 10 years of age (the adolescent period)<sup>(18)</sup>, language of instruction as Kannada and English  
55  
56 179 medium (a surrogate of socio-economic status), location as city and non-city (village and  
57  
58 180 small towns) and maternal and paternal education below 7<sup>th</sup> grade and above 7<sup>th</sup> grade.  
59  
60

1  
2  
3 181 Cross-tabulations were created of actual weight status of the child with the child's perception  
4 182 and parent's perception of their child's current body weight. Using this, the following eight  
5 183 groups were formed. As there were no children who were underweight but were perceived  
6 184 either by themselves or their parents to be overweight, this category was not considered.  
7  
8  
9

10 185 U/U – underweight by actual measurements/perceived by child/parent to be underweight

11 186 U/N- underweight by actual measurements/perceived by child/parent to be normal

12 187 N/U- normal by actual measurements/perceived by child/parent to be underweight

13 188 N/N- normal by actual measurements/perceived by child/parent to be normal

14 189 N/O- normal by actual measurements/perceived by child/parent to be overweight

15 190 O/N- overweight by actual measurements/perceived by child/parent to be normal

16 191 O/O- overweight by actual measurements/perceived by child/parent to be overweight

17 192 O/U- overweight by actual measurements/perceived by child/parent to be underweight

18 193 The referent group was the N/N group.

19 194 The association between attempting weight loss with various socio-demographic factors as  
20 195 well with the above eight groups was evaluated using the Chi-square test and the unadjusted  
21 196 odds ratio reported. Association between attempt to lose weight and child's actual weight  
22 197 status, child's and parent's perception of child's weight status and the above mentioned eight  
23 198 groups were done using Chi square test stratified by age and gender. Binary logistic  
24 199 regression was performed to identify the factors associated with attempted weight loss  
25 200 adjusted for socio-demographic variables of age, gender, medium of instruction, parent's  
26 201 education and current actual body weight status, child's and parent's perceived and desired  
27 202 weight status of the child as model 1. In addition, a model (model 2) adjusted only for age,  
28 203 sex, medium of instruction, actual weight status and the child's weight perception was  
29 204 performed. Binary logistic regression was also performed to identify the factors associated  
30 205 with attempting to lose weight (Yes/No) based on the 8 groups (details above) created using  
31 206 the actual weight status of the child and child's or parent's perception of child's weight,  
32 207 adjusted for age, gender and medium of instruction. A level of significance (two-sided) less  
33 208 than 5% was considered statistically significant.  
34  
35  
36  
37  
38  
39  
40  
41  
42  
43  
44  
45  
46  
47  
48  
49  
50

## 51 209 **RESULTS:**

52  
53  
54 210 Of the 1907 study children, 1874 responded to the question on whether they had ever tried to  
55 211 lose weight. Of these, 65.5% of children were normal weight, 25.0 % underweight and 9.5%  
56 212 overweight. Thirty two percent of children perceived themselves to be underweight; this was  
57  
58  
59  
60



1  
2  
3 213 7% more than the actual prevalence of underweight. Similarly, 15.4% perceived themselves  
4 214 to be overweight (5.9% higher than the actual prevalence). In contrast, parents tended to  
5  
6 215 under-estimate underweight (5% lower than the actual prevalence of under-weight).  
7

8  
9 216 A total of 35% of children had attempted to lose weight; this constituted 73% of overweight  
10 217 and obese, 35% of normal weight and 22% of underweight children. Sixty eight percent of  
11 218 those children who perceived themselves to be overweight, 32% of those who perceived  
12 219 themselves to be normal, and 23% of those who perceived themselves to be underweight  
13 220 attempted to lose weight. Similarly, 54 % of children whose parents perceived them to be  
14 221 overweight, 35% who perceived them to be normal, and 21% of those who perceived them to  
15 222 be underweight attempted to lose weight. Correlations between actual weight status of the  
16 223 child, child's or parent's perception of child's weight status, as well as child's and parent's  
17 224 perceptions on desired (ideal) body weight ranged from 0.12 to 0.31 ( $p<0.01$ )  
18 225 (Supplementary table 1) indicating a low to moderate correlation between these variables.  
19

20  
21  
22 226 Among the socio-demographic factors (Table 1, Model 1), children in schools with Kannada  
23 227 as the medium of instruction were more likely to attempt to lose weight than those studying  
24 228 in schools with English as the medium of instruction (AOR= 1.57, 95% C.I: 1.11 to  
25 229 2.25). Underweight children were less likely to try to lose weight (AOR=0.71, 95% C.I: 0.51  
26 230 to 0.98), while overweight/obese children were more likely (AOR=4.38. 95% C.I: 2.64 to  
27 231 7.28) to try and lose weight compared to normal weight children. Based on the child's  
28 232 perception of their weight status, those who perceived themselves to be overweight were  
29 233 about 3 times more likely (AOR=2.91, 95% C.I: 1.95 to 4.34) to try to lose weight. Parental  
30 234 perception of weight status, however, did not have a significant impact on children  
31 235 attempting to lose weight. Children's (AOR=1.56, 95% C.I: 1.14 to 2.15) and parent's desire  
32 236 (AOR=1.79, 95% C.I: 1.25 to 2.58) for the child to be thinner also increased the likelihood of  
33 237 attempting to lose weight. Based on a simpler model (Model 2) the odds of attempting to  
34 238 lose weight was significantly higher among girls (1.37, CI: 1.11-1.70) compared to boys.  
35 239 Otherwise, the findings were similar to Model 1.  
36

37  
38  
39 240 A stratified analysis based on age and gender (Supplementary table 2) was also done. While  
40 241 the groups were largely similar in terms of attempting to lose weight, significant differences  
41 242 were observed only among those children who were actually underweight as well as those  
42 243 who perceived themselves to be underweight. In these children, the prevalence of attempting  
43 244 to lose weight was significantly higher in older boys compared to older girls. Similarly, there  
44  
45  
46  
47  
48  
49  
50  
51  
52  
53  
54  
55  
56  
57  
58  
59  
60

245 was a significantly higher prevalence of younger girls attempting to lose weight compared to  
246 older girls, but not between younger and older boys.

247 Figure 1 represents the odds of a child attempting to lose weight based on the child's actual  
248 weight status in combination with the child's/parent's perception of weight status. After  
249 adjusting for age, gender and medium of instruction, the odds of attempting to lose weight  
250 (Figure 1, Supplementary table3) increased from 3.1 (95% CI: 2.2 to 4.4) for a normal weight  
251 child who perceive themselves to be overweight/obese, 3.7(95% CI: 2.2 to 6.2) for an  
252 overweight child who perceive themselves to be normal to 18.1 (95% CI: 8.8 to 36.9) for an  
253 overweight child who perceive themselves to be overweight. A similar trend was observed  
254 when parental perceptions were replaced with child's perception (Figure 1) with odds of  
255 attempting to lose weight increasing from 1.7 (95% CI: 1.1 to 2.7) for normal weight child  
256 perceived by a parent to be overweight, 4.7 (95% CI: 2.7 to 8.0) for an overweight child  
257 perceived by a parent to be normal to 19.3(95% CI: 6.8 to 54.8) for an overweight child  
258 perceived to be overweight by a parent. None of the underweight children were perceived by  
259 themselves or by their parents to be overweight. Among children who were underweight but  
260 perceived either by the child or parent to be underweight or normal, the odds of attempting to  
261 lose weight was reduced by approximately 60% to 40% respectively in relation to children of  
262 normal weight status perceived to be normal by both children and parents. The same has been  
263 done using prevalence of attempting to lose weight based on actual weight status, child's  
264 perception and parent's perception of child's weight status stratified by age and gender  
265 (Figure 2a and 2b),

266 The most commonly adopted practice to lose weight regardless of whether the children were  
267 underweight, overweight or normal was exercise (~46%), followed by reducing the quantity  
268 of food intake, ceasing to eat certain kinds of foods and skipping meals (Figure 3).

## 269 **DISCUSSION:**

270 In concurrence with the findings of our study, misperception of weight status among children  
271 has been reported in other studies conducted in the United States of America, with  
272 perceptions differing between various ethnic groups. Among African American adolescents,  
273 one-third perceived their weight status inaccurately<sup>(9)</sup>. Racial or ethnic differences in weight  
274 perception have been reported <sup>(9, 13, 19)</sup>, where Caucasians were more likely than African  
275 Americans to perceive themselves as overweight <sup>(9, 13, 20)</sup>. However, this has not been a  
276 universal finding, as for instance in multi-ethnic adolescents in the United Kingdom <sup>(14)</sup>.



277 Perceptions, however, also governed their decision to attempt weight loss, notwithstanding  
278 their current weight status.

279 In general, children who were actually overweight as well as those who were perceived by  
280 themselves or by their parents to be overweight were highly likely to try to lose weight.  
281 Clearly, perceptions influence their decision to try to lose weight. This finding is similar to  
282 studies conducted in other countries<sup>(9, 19, 21)</sup>. Unless individuals or their families perceive  
283 their weight status correctly, their acceptance of programmes designed to encourage healthy  
284 weight may be low<sup>(12)</sup>.

285 The child's or parent's desire for the child to be thinner also influenced their decision to try to  
286 lose weight. This desire was highest among those who perceived themselves to be  
287 overweight, although about one-third of those who perceived themselves to be normal weight  
288 and about one-fifth of those who perceived themselves to be underweight also attempted to  
289 lose weight. In contrast, among children who were underweight and those of normal weight,  
290 32% and 23% desired to gain weight respectively. This clearly indicates that in a country  
291 where both underweight and overweight co-exist, care must be taken in developing  
292 programmes at a community level such that those who require to put on weight and those  
293 who need to lose weight are considered as for example in the school feeding programmes.

294  
295 The fact that there were reported weight loss attempts even in the underweight group suggests  
296 that factors other than weight status and weight perception are operative. This is corroborated  
297 by the higher odds of children from Kannada medium schools, who belong to a relatively  
298 lower socio-economic status compared to children from English medium schools (higher  
299 SES) trying to lose weight. Thus socio-cultural factors may also influence their decision to  
300 lose weight. This could be linked to the continuous exposure to images and unrealistic body  
301 shapes that encourage weight loss regardless of body weight<sup>(19)</sup>. These factors must be  
302 further explored so that suitable programmes that encourage overweight children but not  
303 underweight or normal children to lose weight are planned.

304 Included in our sample were children as young as 8 years of age. However, body  
305 dissatisfaction with increasing weight status was established even by the age of 5 in both  
306 boys and girls of South Asian origin in UK<sup>(2)</sup>. Irrespective of whether they were below or  
307 above 10 years of age or whether they were boys or girls, children attempted to lose weight.  
308 In our study sample, there were no gender differences in weight loss attempts. This is

1  
2  
3 309 contrary to the findings elsewhere, as for instance, the NHANES study <sup>(11)</sup>, which indicated  
4 310 that girls were about 2 ½ times more likely to attempt to lose weight. The absence of gender  
5 311 differences in our study may, in part, be due to the relatively low prevalence of overweight or  
6 312 obesity.  
7  
8

9  
10 313 It is encouraging that 46 % children indicated exercise their preferred choice of weight loss.  
11 314 Differences in the methods used to lose weight between overweight, normal and underweight  
12 315 children were not apparent unlike other studies where unhealthier weight loss methods like  
13 316 skipping meals are reported more in overweight or obese children compared to normal weight  
14 317 children <sup>(22)</sup>. However, an effect of social desirability cannot be discounted, given that  
15 318 exercise as a healthy lifestyle choice is promoted early in the school curriculum  
16  
17

18 319 Body image must be taken into account when designing programmes to improve both body  
19 320 image and reduce unhealthy behaviours like unhealthy eating and reduced or excessive  
20 321 exercise<sup>(1)</sup>. Since public health programmes are generally targeted towards all, a general  
21 322 programme that caters to all children irrespective of their weight status is required.  
22  
23

24 323 **Strengths and limitations:** This is the first study to report perceptions of body weight in  
25 324 India in relation to weight loss attempts. A major strength of this study is that measured  
26 325 heights and weights rather than self-reported, were used and the study sample encompassed  
27 326 children of diverse socio-economic strata, from rural and urban areas and of a large body  
28 327 weight range. However, with the cross-sectional study design used in this study, the changes  
29 328 in perception as the children grow cannot be accounted for. Longitudinal evaluation of these  
30 329 children will allow us to establish causal links between weight perception and weight loss  
31 330 behaviours. Both the fact that the study was cross-sectional in nature, as well as the design of  
32 331 the questionnaire were limitations as information regarding the frequency, duration, and  
33 332 intensity of weight loss efforts, or time-sequence of events, that is, the time (recent/current or  
34 333 past) at which such behaviours occurred could not be obtained. Data on the reliability and  
35 334 validity of the questionnaire are not available for this population. With the question asked on  
36 335 attempt to lose weight being dichotomous, there is a possibility that a child who is currently  
37 336 normal weight may report weight loss behaviours because they were overweight in the past.  
38 337 The small numbers of children in each category in the analysis stratified by actual and  
39 338 perceived weight status necessitates further exploration with larger numbers of children in  
40 339 each category. A further limitation is that we have not collected data on attempt to gain  
41 340 weight.  
42  
43  
44  
45  
46  
47  
48  
49  
50  
51  
52  
53  
54  
55  
56  
57  
58  
59  
60

1  
2  
3 341  
4  
5 342 Overall, perceptions of weight status influenced the decision of children to lose weight. This  
6  
7 343 needs to be further explored as a longitudinal study to establish causal links. However,  
8  
9 344 regardless of weight status, many children did resort to weight loss. Public health campaigns  
10  
11 345 should emphasize healthy weight management rather than weight loss.

12 346

13  
14  
15 347 *Acknowledgements:* The authors thank Dr. Roopashree who helped in acquisition and entry  
16  
17 348 of part of the data.

18  
19 349 *Contributors:* MP, SS and MV were responsible for the concept and design of the study. SS  
20  
21 350 drafted and the manuscript. MP acquired the data. Sumithra Selvam (SRS) performed the  
22  
23 351 statistical analysis and interpreted the data. MV conceived the study and interpreted the data.  
24  
25 352 All authors revised the manuscript critically for important intellectual content. SS is the  
26  
27 353 guarantor.

28  
29 354 *Funding:* This research received no specific grant from any funding agency in the public,  
30  
31 355 commercial or not-for-profit sectors.

32  
33 356 *Competing interests:* All authors have completed the Unified Competing Interest form at  
34  
35 357 [www.icmje.org/coi\\_disclosure.pdf](http://www.icmje.org/coi_disclosure.pdf) (available on request from the corresponding author) and  
36  
37 358 declare no support from any organisation for the submitted work; no financial relationships  
38  
39 359 with any organisations that might have an interest in the submitted work in the previous 3  
40  
41 360 years/ no other relationships or activities that could appear to have influence the submitted  
42  
43 361 work.

44  
45 362 The Corresponding Author has the right to grant on behalf of all authors and does grant on  
46  
47 363 behalf of all authors, an exclusive licence (or non exclusive for government employees) on a  
48  
49 364 worldwide basis to the BMJ Publishing Group Ltd and its Licensees to permit this article (if  
50  
51 365 accepted) to be published in BMJ editions and any other BMJ PGL products and sub-licences  
52  
53 366 to exploit all subsidiary rights, as set out in your licence (  
54  
55 367 <http://resources.bmj.com/bmj/authors/checklists-forms/licence-for-publication>)

56 368

57 369

58 370

371 **References:**

- 372 1. Grogan S. Body image and health: contemporary perspectives. *J Health Psychol*  
373 2006;11(4):523-30.
- 374 2. Pallan MJ, Hiam LC, Duda JL, Adab P. Body image, body dissatisfaction and weight  
375 status in South Asian children: a cross-sectional study. *BMC Public Health* 2011;11:21.
- 376 3. Maximova K, McGrath JJ, Barnett T, O'Loughlin J, Paradis G, Lambert M. Do you see  
377 what I see? Weight status misperception and exposure to obesity among children and  
378 adolescents. *Int J Obes (Lond)* 2008;32(6):1008-15.
- 379 4. Ceballos N, Czyzewska M. Body image in Hispanic/Latino vs. European American  
380 adolescents: implications for treatment and prevention of obesity in underserved  
381 populations. *J Health Care Poor Underserved* 2010;21(3):823-38.
- 382 5. Ayala GX, Mickens L, Galindo P, Elder JP. Acculturation and body image perception  
383 among Latino youth. *Ethn Health* 2007;12(1):21-41.
- 384 6. Cachelin FM, Rebeck RM, Chung GH, Pelayo E. Does ethnicity influence body-size  
385 preference? A comparison of body image and body size. *Obes Res* 2002;10(3):158-166.
- 386 7. Haff HR. Racial/Ethnic differences in weight perceptions and weight control behaviors  
387 among adolescent females. *Youth & Society* 2009;41(2):278-301.
- 388 8. Swami V, Frederick DA, Aavik T, Alcalay L, Allik J, Anderson D, et al. The attractive  
389 female body weight and female body dissatisfaction in 26 countries across 10 world  
390 regions: results of the international body project I. *Pers Soc Psychol Bull*  
391 2010;36(3):309-25.
- 392 9. Wang Y, Liang H, Chen X. Measured body mass index, body weight perception,  
393 dissatisfaction and control practices in urban, low-income African American adolescents.  
394 *BMC Public Health* 2009;9:183.
- 395 10. Ojala K, Vereecken C, Valimaa R, Currie C, Villberg J, Tynjala J, et al. Attempts to lose  
396 weight among overweight and non-overweight adolescents: a cross-national survey. *Int J*  
397 *Behav Nutr Phys Act* 2007;4:50.
- 398 11. Yan AF, Zhang G, Wang MQ, Stoesen CA, Harris BM. Weight perception and weight  
399 control practice in a multiethnic sample of US adolescents. *South Med J*  
400 2009;102(4):354-60.
- 401 12. Edwards NM, Pettingell S, Borowsky IW. Where perception meets reality: self-  
402 perception of weight in overweight adolescents. *Pediatrics* 2010;125(3):e452-8.
- 403 13. Martin MA, May AL, Frisco ML. Equal weights but different weight perceptions among  
404 US adolescents. *J Health Psychol* 2010;15(4):493-504.
- 405 14. Viner RM, Haines MM, Taylor SJ, Head J, Booy R, Stansfeld S. Body mass, weight  
406 control behaviours, weight perception and emotional well being in a multiethnic sample  
407 of early adolescents. *Int J Obes (Lond)* 2006;30(10):1514-21.
- 408 15. Pauline M, Selvam S, Swaminathan S, Vaz M. Body weight perception is associated  
409 with socio-economic status and current body weight in selected urban and rural South  
410 Indian school-going children. *Public Health Nutr* 2012:1-9.
- 411 16. de Onis M, Onyango AW, Borghi E, Siyam A, Nishida C, Siekmann J. Development of a  
412 WHO growth reference for school-aged children and adolescents. *Bull World Health*  
413 *Organ* 2007;85(9):660-7.
- 414 17. Stunkard AJ, Sorensen T, Schulsinger F. Use of the Danish Adoption Register for the  
415 study of obesity and thinness. In: Kety SS RL, Sidman RL, Matthysse SW, editor.  
416 *Genetics of Neurological and Psychiatric Disorders.*of Neurological and Psychiatric  
417 *Disorders.* New York: Raven Press; 1983. p. 115-120.
- 418 18. World Health Organization. Nutrition in adolescence. Issues and Challenges for the  
419 health sector. Discussion paper. Geneva: WHO; 2005.

- 1  
2  
3 420 19. Duncan JS, Duncan EK, Schofield G. Associations between weight perceptions, weight  
4 421 control and body fatness in a multiethnic sample of adolescent girls. *Public Health Nutr*  
5 422 2010;14(1):93-100.  
6 423 20. Neff LJ, Sargent RG, McKeown RE, Jackson KL, Valois RF. Black-white differences in  
7 424 body size perceptions and weight management practices among adolescent females. *J*  
8 425 *Adolesc Health* 1997;20(6):459-65.  
9 426 21. Alwan H, Viswanathan B, Paccaud F, Bovet P. Is Accurate Perception of Body Image  
10 427 Associated with Appropriate Weight-Control Behavior among Adolescents of the  
11 428 Seychelles. *J Obes* 2011;2011:817242.  
12 429 22. Boutelle K, Neumark-Sztainer D, Story M, Resnick M. Weight control behaviors among  
13 430 obese, overweight, and nonoverweight adolescents. *J Pediatr Psychol* 2002;27(6):531-40.  
14 431  
15 432  
16  
17  
18  
19  
20  
21  
22  
23  
24  
25  
26  
27  
28  
29  
30  
31  
32  
33  
34  
35  
36  
37  
38  
39  
40  
41  
42  
43  
44  
45  
46  
47  
48  
49  
50  
51  
52  
53  
54  
55  
56  
57  
58  
59  
60

Table 1. Socio-economic and anthropometric associations of weight loss behaviour

|                                | Attempted weight loss |           | Unadjusted OR<br>95% C.I. | P value*            | Adjusted † OR<br>Model 1<br>95% C.I. | P value‡            | Adjusted ¶ OR<br>Model 2<br>95% C.I. | P value‡            |        |
|--------------------------------|-----------------------|-----------|---------------------------|---------------------|--------------------------------------|---------------------|--------------------------------------|---------------------|--------|
|                                | Yes                   | No        |                           |                     |                                      |                     |                                      |                     |        |
| Gender                         |                       |           |                           |                     |                                      |                     |                                      |                     |        |
|                                | Girls                 | 387 (39%) | 616 (61%)                 | 1.41<br>1.16 – 1.72 | <0.001                               | 1.16<br>0.89 – 1.51 | 0.27                                 | 1.37<br>1.11 – 1.70 | 0.01   |
|                                | Boys                  | 268 (31%) | 603 (69%)                 | 1                   |                                      | 1                   | 1                                    |                     |        |
| Age category (years)           |                       |           |                           |                     |                                      |                     |                                      |                     |        |
|                                | ≤10                   | 245 (34%) | 469 (66%)                 | 0.96<br>0.78 – 1.17 | 0.65                                 | 1.04<br>0.79 – 1.36 | 0.76                                 | 1.03<br>0.83 – 1.28 | 0.79   |
|                                | >10                   | 410 (35%) | 750 (65%)                 | 1                   |                                      | 1                   | 1                                    |                     |        |
| Location                       |                       |           |                           |                     |                                      |                     |                                      |                     |        |
|                                | City                  | 408 (33%) | 812 (67%)                 | 0.83<br>0.68 – 1.01 | 0.06                                 | 1.03<br>0.78 – 1.36 | 0.81                                 | -                   | -      |
|                                | Non City              | 247 (38%) | 407 (62%)                 | 1                   |                                      | 1                   | 1                                    |                     |        |
| Education of mother (Standard) |                       |           |                           |                     |                                      |                     |                                      |                     |        |
|                                | Up to 7 <sup>th</sup> | 146 (34%) | 278 (66%)                 | 0.95<br>0.75 – 1.22 | 0.69                                 | 0.81<br>0.58 – 1.14 | 0.22                                 | -                   | -      |
|                                | > 7 <sup>th</sup>     | 400 (36%) | 727 (65%)                 | 1                   |                                      | 1                   | 1                                    |                     |        |
| Education of father (Standard) |                       |           |                           |                     |                                      |                     |                                      |                     |        |
|                                | Up to 7 <sup>th</sup> | 161 (39%) | 256 (61%)                 | 1.21<br>0.95 – 1.53 | 0.10                                 | 1.24<br>0.87-1.78   | 0.22                                 | -                   | -      |
|                                | > 7 <sup>th</sup>     | 437 (34%) | 838 (66%)                 | 1                   |                                      | 1                   | 1                                    |                     |        |
| Medium of instruction          |                       |           |                           |                     |                                      |                     |                                      |                     |        |
|                                | Kannada               | 198 (39%) | 308 (61%)                 | 1.28<br>1.03- 1.59  | 0.02                                 | 1.57<br>1.11 – 2.25 | 0.01                                 | 1.52<br>1.20 – 1.92 | <0.001 |
|                                | English <sup>1</sup>  | 457(33%)  | 911 (67%)                 | 1                   |                                      | 1                   | 1                                    |                     |        |

|                                           |           |           |             |        |             |        |             |        |  |
|-------------------------------------------|-----------|-----------|-------------|--------|-------------|--------|-------------|--------|--|
| Actual weight status                      |           |           |             |        |             |        |             |        |  |
| Underweight                               | 98 (22%)  | 352 (78%) | 0.52        | <0.001 | 0.71        | 0.04   | 0.66        |        |  |
|                                           |           |           | 0.40 – 0.67 |        | 0.51 – 0.98 |        | 0.50 – 0.86 | 0.002  |  |
| Overweight                                | 125 (73%) | 47 (27%)  | 4.96        | <0.001 | 4.38        | <0.001 | 3.86        |        |  |
|                                           |           |           | 3.43 – 7.20 |        | 2.64 – 7.28 |        | 2.63 – 5.64 | <0.001 |  |
| Normal                                    | 412 (35%) | 769 (65%) | 1           |        | 1           |        |             |        |  |
| Child's perception of body image          |           |           |             |        |             |        |             |        |  |
| Too /A little Thin                        | 133 (23%) | 457 (77%) | 0.61        | <0.001 | 0.67        | 0.01   | 0.64        | <0.001 |  |
|                                           |           |           | 0.48 – 0.77 |        | 0.49 – 0.93 |        | 0.49 – 0.82 |        |  |
| A little /Too fat                         | 195 (68%) | 91 (32%)  | 4.48        | <0.001 | 2.91        | <0.001 | 3.48        | <0.001 |  |
|                                           |           |           | 3.35 – 6.00 |        | 1.95 – 4.34 |        | 2.57 – 4.69 |        |  |
| Normal                                    | 318 (32%) | 665 (68%) | 1           |        | 1           |        |             |        |  |
| Child's desire to be                      |           |           |             |        |             |        |             |        |  |
| A lot /Slightly fatter                    | 114 (25%) | 347 (75%) | 0.76        | 0.03   | 0.84        | 0.35   |             |        |  |
|                                           |           |           | 0.58 – 0.98 |        | 0.59 – 1.20 |        |             |        |  |
| Slightly/Much thinner                     | 260(52%)  | 237 (48%) | 2.53        | <0.001 | 1.56        | 0.006  | -           | -      |  |
|                                           |           |           | 2.00 – 3.19 |        | 1.14 – 2.15 |        |             |        |  |
| Same as at present                        | 272 (30%) | 627 (70%) | 1           |        | 1           |        |             |        |  |
| Parent's perception of child's body image |           |           |             |        |             |        |             |        |  |
| Too /A little Thin                        | 66 (22%)  | 241 (79%) | 0.52        | <0.001 | 0.76        | 0.15   |             |        |  |
|                                           |           |           | 0.38 – 0.71 |        | 0.52 – 1.12 |        | -           | -      |  |
| A little /Too fat                         | 95 (54%)  | 82 (46%)  | 2.20        | <0.001 | 0.86        |        |             |        |  |
|                                           |           |           | 1.58 – 3.08 |        | 0.51 – 1.37 | 0.51   |             |        |  |
| Normal                                    | 364 (35%) | 690 (66%) | 1           |        | 1           |        |             |        |  |
| Parent's desire for child to be           |           |           |             |        |             |        |             |        |  |
| A lot /Slightly fatter                    | 87 (21%)  | 331 (79%) | 0.54        | <0.001 | 0.75        | 0.11   |             |        |  |
|                                           |           |           | 0.41- 0.72  |        | 0.52 – 1.07 |        | -           | -      |  |
| Slightly /Much thinner                    | 170 (56%) | 134 (44%) | 2.61        | <0.001 | 1.79        |        |             |        |  |
|                                           |           |           | 1.98 – 3.46 |        | 1.25 – 2.58 | 0.002  |             |        |  |
| Same as at present                        | 263 (33%) | 542 (67%) | 1           |        | 1           |        |             |        |  |

Results are reported as Number (percentages); OR – Odds Ratio; 95% C.I. – 95% Confidence Interval

\*Fisher's Exact test or Chi square test

1  
2  
3  
4  
5 † Adjusted for actual BMI status, child's and parents perception of body weight and socio-demographic factors

6 ‡ Obtained by fitting binary logistic regression model. Model 1: Adjusted for socio-demographic variables and actual and perceived weight

7 ¶ Obtained by fitting binary logistic regression model. Model 2: Adjusted for age, gender, medium of instruction, actual weight status and child's perception of  
8 body weight.  
9

10  
11  
12  
13  
14  
15  
16  
17  
18  
19  
20  
21  
22  
23  
24  
25  
26  
27  
28  
29  
30  
31  
32  
33  
34  
35  
36  
37  
38  
39  
40  
41  
42  
43  
44  
45  
46  
47  
48  
49

For peer review only



1  
2  
3  
4  
5  
6  
7  
8 **Figure Legends:**  
9

10 **Figure 1: Odds ratio of having tried to lose body weight in children classified by current**  
11 **weight status and perception of body weight.** ■ Comparison of child's actual weight

12 status with child's perception of weight status □ Comparison of child's actual weight  
13 status with parental perception of weight status. U/U: underweight by actual  
14 measurements/child's or parent's perception of being underweight, U/N: underweight by  
15 actual measurements/child's or parent's perception of being normal, N/U- normal by actual  
16 measurements/perceived by child/parent to be underweight, N/N: normal by actual  
17 measurements/child's or parent's perception of being normal, N/O: normal by actual  
18 measurements/child's or parent's perception of being overweight, O/N: overweight by actual  
19 measurements/child's or parent's perception of being normal, O/O: overweight by actual  
20 measurements/child's or parent's perception of being overweight, O/U: overweight by actual  
21 measurements/child's or parent's perception of being underweight.  
22  
23  
24  
25  
26  
27  
28  
29  
30  
31  
32

33  
34 **Figure 2a and 2b: Prevalence of attempting to lose weight by gender and age category**  
35 **based on actual weight status and children and parent's perception of child's body**  
36 **weight. UW – Underweight, OW – Overweight**  
37  
38  
39

40 **Figure 3: Actual weight status and weight loss practices of children**

41  
42 ■ Exercise ■ Reduced quantity of food eaten ■ Stopped eating certain kind of foods  
43 □ Skipping meals  
44  
45  
46  
47  
48  
49  
50  
51  
52  
53  
54  
55  
56  
57  
58  
59  
60

1  
2  
3 1 BODY WEIGHT PERCEPTION INFLUENCES WEIGHT LOSS BEHAVIOR IN SOUTH  
4 2 INDIAN CHILDREN ACROSS A WIDE BODY WEIGHT RANGE– A CROSS-  
5 3 SECTIONAL STUDY  
6

7  
8 4 Sumathi Swaminathan *Assistant Professor Division of Nutrition*<sup>1</sup>, Sumithra Selvam *Lecturer*  
9 5 *Division of Biostatistics and Epidemiology*<sup>1</sup>, Maria Pauline *Assistant Professor, Department*  
10 6 *of Physiology*<sup>2</sup>, Mario Vaz *Professor Department of Physiology and Division of Humanities*  
11 7 *and Health*<sup>1,2</sup>

12  
13 8 <sup>1</sup>St. John's Research Institute, St John's National Academy of Health Sciences, Koramangala,  
14 9 Bangalore- 560 034, Karnataka, India; <sup>2</sup> St.John's Medical College & Hospital, St. John's  
15 10 National Academy of Health Sciences, Koramangala, Bangalore- 560 034, Karnataka, India  
16  
17  
18  
19  
20  
21  
22  
23

24  
25 14 Correspondence to: Sumathi Swaminathan  
26 15 E-mail: [sumathi@sjri.res.in](mailto:sumathi@sjri.res.in)  
27 16 St John's Research Institute,  
28 17 St John's national Academy of Health Sciences,  
29 18 Koramangala, Bangalore: 560 034  
30 19 Karnataka, India  
31  
32  
33  
34  
35  
36  
37  
38  
39  
40  
41  
42  
43  
44  
45  
46  
47  
48  
49  
50  
51  
52  
53  
54  
55  
56  
57  
58  
59  
60

24 Short title: Body weight perception influences weight loss in South Indian children

25

**Abstract:**

**Objective:** To examine the patterns of weight loss behaviour and the association between weight loss attempts with actual weight status and children's and parental perceptions of weight status.

**Design:** Cross sectional study

**Setting:** Karnataka, South India

**Participants:** 1874 girls and boys aged 8 to 14 years from 7 schools in Karnataka, South India

**Main outcome measures:** The association between weight loss attempts and socio-demographic factors, weight status and the child or parent's perception of weight status.

**Results:** Approximately 73% of overweight and obese, 35% of normal weight and 22% of underweight children attempted to lose weight. Children of lower socio-economic groups studying in schools in the local vernacular and overweight/obese children were more likely to attempt to lose weight (Adjusted odds ratio or AOR=1.57, 95% CI: 1.11 to 2.25; AOR= 4.38, 95% CI: 2.64 to 7.28, respectively). Perception of weight status was important in influencing weight loss attempts. Thus, children who were normal weight but perceived themselves to be overweight / obese were three times more likely to attempt weight loss compared with those who accurately perceived themselves as normal weight, while the odds of attempting weight loss were the highest for those who were overweight and perceived themselves to be so (AOR ~ 18).

**Conclusions:** Children are likely to attempt weight loss in India irrespective of their weight status, age and gender. Children who were actually overweight as well as those who were perceived by themselves or by their parents to be overweight or obese were highly likely to try to lose weight. It is necessary to understand body weight perceptions in communities with a dual burden of overweight and under-nutrition, if intervention programmes for either are to be successful.

52

53

ARTICLE FOCUS:

- To explore weight loss behaviour patterns and association between weight loss attempts with socio-demographic factors, actual as well as children's and parental perceptions of child's weight status.

KEY MESSAGES

- In India, where both overweight and underweight in children co-exist, there are no data on the associations of body weight perceptions of children in relation to weight loss attempts. It is essential to understand this association in order to tailor suitable intervention programmes that can work in communities with concurrent under- and over-nutrition.
- Weight loss is attempted by children irrespective of weight status, age and gender. However, there are higher odds of attempting to lose weight among those who perceive themselves to be overweight, although their weight status may be normal.

STRENGTHS AND LIMITATIONS

- This is the first study to report perceptions of body weight in India in relation to weight loss attempts.
- The cross-sectional study design used in this study, allows only associations to be assessed.

54

55

56

## 57 INTRODUCTION:

58 Body image is a psycho-social dimension of body size that encompasses both perceptual and  
59 attitudinal factors<sup>(1)</sup> and has been associated with eating disorders. In recent years, its  
60 association with overweight and obesity has been described<sup>(2)</sup>. It is recognised that  
61 individuals make decisions on lifestyle behaviours based on body weight perceptions (a  
62 dimension of body image)<sup>(1, 3)</sup>. **In India, there is a large burden of under-nutrition alongside  
63 increasing overweight and obesity.** For public health and clinical programmes to be more  
64 effective, body image of undernourished and overweight children should be understood in the  
65 context of the influence of culture on body weight perceptions and on weight management  
66 behaviours.

67 A large number of studies have indicated that children and adolescents misperceive their  
68 body weight status. Interventions that address socio-cultural attitudes towards appearance  
69 should ideally reduce body image dissatisfaction as well as overweight and obesity since  
70 studies have indicated a relationship between body image, unhealthy eating practices and  
71 obesity<sup>(4, 5)</sup>. Perceptions of body weight are, in part, influenced by external factors including  
72 cultural norms and social preferences **as it has been observed that Asian women have less  
73 body dissatisfaction than other ethnic groups<sup>(6)</sup>.** In India, it is often believed that an  
74 **overweight person is wealthier and happier and reflects social mobility to a higher status  
75 compared to an underweight person, although there are no studies to corroborate this.** The  
76 disconnect between actual weight and perception of body size could stem from the extent to  
77 which individuals identify with the majority cultural standards of beauty<sup>(7)</sup>. There are also  
78 reports that individuals in less socio-economically developed societies positively evaluate  
79 overweight and obese figures<sup>(8)</sup>. Evidence also suggests associations of actual body weight,  
80 body weight perceptions and weight dissatisfaction with weight control practices; overweight  
81 children are more likely to try to lose weight compared to non-overweight children<sup>(9,</sup>  
82 <sup>10)</sup>. Analysis of data from the National Health and Nutrition Examination Survey (NHANES)  
83 <sup>(11)</sup> and the Youth Risk Behaviour Surveillance Survey (YRBSS)<sup>(7, 12)</sup> indicate that those  
84 overweight children who perceived their weight status correctly were more likely to exercise  
85 or eat less for weight control. Results from an analysis from Europe, Israel and North  
86 America as part of the Health Behaviour in School aged Children (HBSC) 2001/2002 survey  
87 indicated that weight status perception of weight and age were significant factors influencing  
88 current attempt to lose weight<sup>(10)</sup>.

1  
2  
3 89 For healthy weight management it is necessary for a person to perceive his or her weight  
4 90 status accurately as well as be aware of healthy methods to lose or gain weight. Most  
5 91 literature on body weight perceptions and weight control behaviours are related to studies  
6 92 done in developed countries<sup>(7, 9, 11, 13)</sup> with a few on ethnic minorities, including South Asians  
7 93<sup>(2, 14)</sup>. The present analysis aims to examine the associations between the actual weight  
8 94 status, body weight perceptions of both children and their parents, and body weight  
9 95 satisfaction with weight loss intentions. The study sample included a wide range of body  
10 96 weights to reflect the dual burden of under-nutrition and overweight/obesity that India  
11 97 currently faces.

## 18 98 **METHODS:**

### 20 99 **Study population:**

21 100 A total of 2083 school children aged 8 to 14 years from 7 schools of varying socio-  
22 101 economic status located in rural areas, towns in Karnataka and urban Bangalore in South  
23 102 India, were contacted at baseline out of which 1907 (91.6%) children participated in a  
24 103 longitudinal study on body image perceptions and growth indices of school children, details  
25 104 of which are published earlier<sup>(15)</sup>. Convenience sampling of 7 city and non-city (rural and  
26 105 small towns) co-educational, non-residential schools was employed, such that children  
27 106 representing various socio-economic statuses (based on school fees linked to medium of  
28 107 instruction) were recruited. Of these schools, 2 were located in villages, 3 in small towns and  
29 108 2 in Bangalore city. The schools in which Kannada, the regional state language, was the  
30 109 language of instruction, received government support and had annual tuition fees of Rs.250 to  
31 110 500 whereas English medium schools did not receive government support and had annual  
32 111 tuition fees of above Rs.6000. Hence the medium of instruction in schools was used as an  
33 112 indicator of socio-economic status (SES). Three schools (1 each in a village, small town and  
34 113 city) had Kannada as the medium of instruction while four schools (1 in a village, 2 in small  
35 114 towns and 1 in the city) had English as the medium of instruction.

36 115 The sample recruited had adequate power (above 80 %) to identify the significant socio-  
37 116 demographic predictors for perception of body image in the present study and to estimate a  
38 117 difference of at least 10% over-estimation or under-estimation of body weight at 5% level of  
39 118 significance. Ethical approval was obtained from the Institutional Ethical Review Board.

1  
2  
3 119 Principals of schools were contacted for permission to conduct the study in their schools.  
4 120 Written parental consent and assent from the child was also obtained. A questionnaire to  
5 assess body image perception was administered by an investigator (MP) to all the consenting  
6 students in a class by reading aloud the questions in either English or Kannada (the local  
7 language). Responses were marked on the questionnaire by each child. A short questionnaire  
8 in English or the local language to be filled by one of the parents was sent home after the  
9 children completed their questionnaires. Children whose parents were illiterate (6.7%  
10 mothers, 5.9% fathers), elicited the answers from either of their parents and filled up the  
11 questionnaire.  
12  
13  
14  
15  
16  
17

### 128 **Measurements:**

129 Height was measured using a fibreglass tape without foot wear to 0.2 cm. Weight was  
130 measured in school uniforms but without shoes using a calibrated digital scale (Home Health,  
131 Model 8604, Dr. Morepen Lab, Hong Kong) to the nearest 100 gm. All measurements were  
132 made using a standardized protocol. Body mass index (BMI) was computed and the BMI-  
133 for-age z score values were obtained using the World Health Organization Anthroplus  
134 software version 1.0.2 (WHO, Geneva, Switzerland). Children were then categorized by  
135 actual weight status as overweight ( $>+1$  SD), normal ( $< -2$  to  $+1$ ) and underweight ( $< -2$   
136 SD). These values at 19 years of age, at  $+1$  standard deviation (SD) correspond to the BMI  
137 values of  $25.4 \text{ kg/m}^2$  for boys and  $25.0 \text{ kg/m}^2$  for girls and is equivalent to the overweight  
138 cut-off for adults ( $> 25.0 \text{ kg/m}^2$ ), while the  $+2$  SD value ( $29.7 \text{ kg/m}^2$  for both sexes) compares  
139 closely with the cut-off for obesity ( $> 30.0 \text{ kg/m}^2$ )<sup>(16)</sup>.

140 To assess current body weight perception, children were asked to mark whether they  
141 thought their body weight or appearance was “too thin”, “a little thin”, “normal”, “a little  
142 fat”, or “very fat”. Response to a similar identical question about their child’s body weight or  
143 appearance with similar options was filled by parents in a questionnaire sent to their homes.  
144 For analysis, “very thin” and “a little thin” were combined as “too/little thin” and “a little fat”  
145 and “very fat” were combined as “a little/too fat” and “normal” remained “normal”.

146 To assess perceptions on desired (ideal) body weight, children responded to the  
147 question “I want to be” with options “a lot fatter”, “slightly fatter”, “as I am at present”,  
148 “slightly thinner”, “much thinner”. The first 2 options were clubbed as “a lot/slightly fatter”,  
149 “as I am at present” as “same as at present” and the last 2 options clubbed as “slightly/much  
150 thinner. Parents responded to a similar question on “I want my child to be” with an identical



1  
2  
3 151 set of options. For analysis, clubbing of the options for parents desired body weight for their  
4  
5 152 child was also done in a similar manner.

6  
7 153 The Stunkard's silhouettes<sup>(17)</sup> were also used to assess body image perception in  
8  
9 154 children and this was also administered in the classroom. In order to make comparisons with  
10  
11 155 the body weight perception questions, the nine images were regrouped to reflect the 3  
12  
13 156 categories of weight status as underweight, normal and overweight. The agreement between  
14  
15 157 the perceived visual image and the body weight perception obtained by questions of current  
16  
17 158 weight status, evaluated using kappa statistics ranged from 0.23 to 0.53. A fair agreement  
18  
19 159 between underweight/fat and normal, and a moderate agreement between both the extremes  
20  
21 160 of weight (underweight versus overweight) was seen. There were no gender differences in  
22  
23 161 agreement. Parental perceptions of the body weight were assessed using structured questions  
24  
25 162 only, and since this was available both for the parent and the child, further analyses were  
26  
27 163 done using the questions only.

28  
29 164 In addition, children were asked whether they had ever tried to lose weight. If they  
30  
31 165 replied in the affirmative (options: yes/no), the method used to try and lose weight was  
32  
33 166 recorded as "skipping meals", "stopped eating a certain kind of food", reduced quantity of  
34  
35 167 food eaten" and "exercise" as a multiple response. Weight loss methods recommended by  
36  
37 168 parents were similarly recorded.

38  
39 169 The present analysis is restricted to children on whom anthropometric measurements were  
40  
41 170 available and who responded to the question on weight loss and this corresponds to 1874  
42  
43 171 participants (871 boys, 1003 girls). The response rate (of a total of 1907 children) was 98.3%;  
44  
45 172 socio-demographic (age, gender, medium of instruction) characteristics between the  
46  
47 173 responders and non responders were comparable.

48  
49 174

#### 175 **Statistical analysis:**

50  
51 176 Data are reported as number and percentages for all the categorical variables. For analysis,  
52  
53 177 socio-demographic variables of age of children were categorized as 10 and below and above  
54  
55 178 10 years of age (the adolescent period)<sup>(18)</sup>, language of instruction as Kannada and English  
56  
57 179 medium (a surrogate of socio-economic status), location as city and non-city (village and  
58  
59 180 small towns) and maternal and paternal education below 7<sup>th</sup> grade and above 7<sup>th</sup> grade.



1  
2  
3 181 Cross-tabulations were created of actual weight status of the child with the child's perception  
4 182 and parent's perception of their child's current body weight. Using this, the following **eight**  
5 183 groups were formed. **As there were no children who were underweight but were perceived**  
6 184 **either by themselves or their parents to be overweight, this category was not considered.**

7  
8  
9  
10 185 U/U – underweight by actual measurements/perceived by child/parent to be underweight

11 186 U/N- underweight by actual measurements/perceived by child/parent to be normal

12 187 **N/U- normal by actual measurements/perceived by child/parent to be underweight**

13 188 N/N- normal by actual measurements/perceived by child/parent to be normal

14 189 N/O- normal by actual measurements/perceived by child/parent to be overweight

15 190 O/N- overweight by actual measurements/perceived by child/parent to be normal

16 191 O/O- overweight by actual measurements/perceived by child/parent to be overweight

17 192 **O/U- overweight by actual measurements/perceived by child/parent to be underweight**

18 193 The referent group was the N/N group.

19 194 The association between attempting weight loss with various socio-demographic factors as  
20 195 well with the above eight groups was evaluated using the Chi-square test and the unadjusted  
21 196 odds ratio reported. **Association between attempt to lose weight and child's actual weight**  
22 197 **status, child's and parent's perception of child's weight status and the above mentioned eight**  
23 198 **groups were done using Chi square test stratified by age and gender.** Binary logistic  
24 199 regression was performed to identify the factors associated with attempted weight loss  
25 200 adjusted for socio-demographic variables **of age, gender, medium of instruction, parent's**  
26 201 **education and current actual body weight status, child's and parent's perceived and desired**  
27 202 **weight status of the child as model 1. In addition, a model (model 2) adjusted only for age,**  
28 203 **sex, medium of instruction, actual weight status and the child's weight perception was**  
29 204 **performed.** Binary logistic regression was also performed to identify the factors associated  
30 205 with attempting to lose weight (**Yes/No**) based on the 8 groups (details above) created using  
31 206 the actual weight status of the child and child's or parent's perception of child's weight,  
32 207 adjusted for age, gender and medium of instruction. A level of significance (two-sided) less  
33 208 than 5% was considered statistically significant.

34 209 **RESULTS:**

35 210 Of the 1907 study children, 1874 responded to the question on whether they had ever tried to  
36 211 lose weight. Of these, 65.5% of children were normal weight, 25.0 % underweight and 9.5%  
37 212 overweight. Thirty two percent of children perceived themselves to be underweight; this was

1  
2  
3 213 7% more than the actual prevalence of underweight. Similarly, 15.4% perceived themselves  
4 214 to be overweight (5.9% higher than the actual prevalence). In contrast, parents tended to  
5  
6 215 under-estimate underweight (5% lower than the actual prevalence of under-weight).  
7

8  
9 216 A total of 35% of children had attempted to lose weight; this constituted 73% of overweight  
10 217 and obese, 35% of normal weight and 22% of underweight children. Sixty eight percent of  
11 218 those children who perceived themselves to be overweight, 32% of those who perceived  
12 219 themselves to be normal, and 23% of those who perceived themselves to be underweight  
13 220 attempted to lose weight. Similarly, 54 % of children whose parents perceived them to be  
14 221 overweight, 35% who perceived them to be normal, and 21% of those who perceived them to  
15 222 be underweight attempted to lose weight. **Correlations between actual weight status of the**  
16 223 **child, child's or parent's perception of child's weight status, as well as child's and parent's**  
17 224 **perceptions on desired (ideal) body weight ranged from 0.12 to 0.31 (p<0.01)**  
18 225 **(Supplementary table 1) indicating a low to moderate correlation between these variables.**  
19  
20  
21  
22  
23  
24  
25

26 226 Among the socio-demographic factors (Table 1, Model 1), children in schools with Kannada  
27 227 as the medium of instruction were more likely to attempt to lose weight than those studying  
28 228 in schools with English as the medium of instruction (AOR= 1.57, 95% C.I: 1.11 to  
29 229 2.25). Underweight children were less likely to try to lose weight (AOR=0.71, 95% C.I: 0.51  
30 230 to 0.98), while overweight/obese children were more likely (AOR=4.38. 95% C.I: 2.64 to  
31 231 7.28) to try and lose weight compared to normal weight children. Based on the child's  
32 232 perception of their weight status, those who perceived themselves to be overweight were  
33 233 about 3 times more likely (AOR=2.91, 95% C.I: 1.95 to 4.34) to try to lose weight. Parental  
34 234 perception of weight status, however, did not have a significant impact on children  
35 235 attempting to lose weight. Children's (AOR=1.56, 95% C.I: 1.14 to 2.15) and parent's desire  
36 236 (AOR=1.79, 95% C.I: 1.25 to 2.58) for the child to be thinner also increased the likelihood of  
37 237 attempting to lose weight. **Based on a simpler model (Model 2) the odds of attempting to**  
38 238 **lose weight was significantly higher among girls (1.37, CI: 1.11-1.70) compared to boys.**  
39 239 **Otherwise, the findings were similar to Model 1.**  
40  
41  
42  
43  
44  
45  
46  
47  
48  
49

50 240 **A stratified analysis based on age and gender (Supplementary table 2) was also done. While**  
51 241 **the groups were largely similar in terms of attempting to lose weight, significant differences**  
52 242 **were observed only among those children who were actually underweight as well as those**  
53 243 **who perceived themselves to be underweight. In these children, the prevalence of attempting**  
54 244 **to lose weight was significantly higher in older boys compared to older girls. Similarly, there**  
55  
56  
57  
58  
59  
60

1  
2  
3 245 was a significantly higher prevalence of younger girls attempting to lose weight compared to  
4  
5 246 older girls, but not between younger and older boys.

7 247 Figure 1 represents the odds of a child attempting to lose weight based on the child's actual  
8  
9 248 weight status in combination with the child's/parent's perception of weight status. After  
10  
11 249 adjusting for age, gender and medium of instruction, the odds of attempting to lose weight  
12  
13 250 (Figure 1, Supplementary table3) increased from 3.1 (95% CI: 2.2 to 4.4) for a normal weight  
14  
15 251 child who perceive themselves to be overweight/obese, 3.7(95% CI: 2.2 to 6.2) for an  
16  
17 252 overweight child who perceive themselves to be normal to 18.1 (95% CI: 8.8 to 36.9) for an  
18  
19 253 overweight child who perceive themselves to be overweight. A similar trend was observed  
20  
21 254 when parental perceptions were replaced with child's perception (Figure 1) with odds of  
22  
23 255 attempting to lose weight increasing from 1.7 (95% CI: 1.1 to 2.7) for normal weight child  
24  
25 256 perceived by a parent to be overweight, 4.7 (95% CI: 2.7 to 8.0) for an overweight child  
26  
27 257 perceived by a parent to be normal to 19.3(95% CI: 6.8 to 54.8) for an overweight child  
28  
29 258 perceived to be overweight by a parent. None of the underweight children were perceived by  
30  
31 259 themselves or by their parents to be overweight. Among children who were underweight but  
32  
33 260 perceived either by the child or parent to be underweight or normal, the odds of attempting to  
34  
35 261 lose weight was reduced by approximately 60% to 40% respectively in relation to children of  
36  
37 262 normal weight status perceived to be normal by both children and parents. **The same has been  
38  
39 263 done using prevalence of attempting to lose weight based on actual weight status, child's  
40  
41 264 perception and parent's perception of child's weight status stratified by age and gender  
42  
43 265 (Figure 2a and 2b),**

44  
45 266 The most commonly adopted practice to lose weight regardless of whether the children were  
46  
47 267 underweight, overweight or normal was exercise (~46%), followed by reducing the quantity  
48  
49 268 of food intake, ceasing to eat certain kinds of foods and skipping meals (Figure 3).

#### 45 269 **DISCUSSION:**

48 270 In concurrence with the findings of our study, misperception of weight status among children  
49  
50 271 has been reported in other studies conducted in the United States of America, with  
51  
52 272 perceptions differing between various ethnic groups. Among African American adolescents,  
53  
54 273 one-third perceived their weight status inaccurately<sup>(9)</sup>. Racial or ethnic differences in weight  
55  
56 274 perception have been reported<sup>(9, 13, 19)</sup>, where Caucasians were more likely than African  
57  
58 275 Americans to perceive themselves as overweight<sup>(9, 13, 20)</sup>. **However, this has not been a  
59  
60 276 universal finding, as for instance in multi-ethnic adolescents in the United Kingdom<sup>(14)</sup>.**

277 Perceptions, however, also governed their decision to attempt weight loss, notwithstanding  
278 their current weight status.

279 In general, children who were actually overweight as well as those who were perceived by  
280 themselves or by their parents to be overweight were highly likely to try to lose weight.  
281 Clearly, perceptions influence their decision to try to lose weight. This finding is similar to  
282 studies conducted in other countries<sup>(9, 19, 21)</sup>. Unless individuals or their families perceive  
283 their weight status correctly, their acceptance of programmes designed to encourage healthy  
284 weight may be low<sup>(12)</sup>.

285 The child's or parent's desire for the child to be thinner also influenced their decision to try to  
286 lose weight. **This desire was highest among those who perceived themselves to be  
287 overweight, although about one-third of those who perceived themselves to be normal weight  
288 and about one-fifth of those who perceived themselves to be underweight also attempted to  
289 lose weight. In contrast, among children who were underweight and those of normal weight,  
290 32% and 23% desired to gain weight respectively. This clearly indicates that in a country  
291 where both underweight and overweight co-exist, care must be taken in developing  
292 programmes at a community level such that those who require to put on weight and those  
293 who need to lose weight are considered as for example in the school feeding programmes.**

294  
295 The fact that there were reported weight loss attempts even in the underweight group suggests  
296 that factors other than weight status and weight perception are operative. This is corroborated  
297 by the higher odds of children from Kannada medium schools, who belong to a relatively  
298 lower socio-economic status compared to children from English medium schools (higher  
299 SES) trying to lose weight. Thus socio-cultural factors may also influence their decision to  
300 lose weight. This could be linked to the continuous exposure to images and unrealistic body  
301 shapes that encourage weight loss regardless of body weight<sup>(19)</sup>. These factors must be  
302 further explored so that suitable programmes that encourage overweight children but not  
303 underweight or normal children to lose weight are planned.

304 Included in our sample were children as young as 8 years of age. However, body  
305 dissatisfaction with increasing weight status was established even by the age of 5 in both  
306 boys and girls of South Asian origin in UK<sup>(2)</sup>. Irrespective of whether they were below or  
307 above 10 years of age or whether they were boys or girls, children attempted to lose weight.  
308 In our study sample, there were no gender differences in weight loss attempts. This is

1  
2  
3 309 contrary to the findings elsewhere, as for instance, the NHANES study <sup>(11)</sup>, which indicated  
4 310 that girls were about 2 ½ times more likely to attempt to lose weight. The absence of gender  
5 311 differences in our study may, in part, be due to the relatively low prevalence of overweight or  
6 312 obesity.  
7  
8

9  
10 313 It is encouraging that 46 % children indicated exercise their preferred choice of weight loss.  
11 314 Differences in the methods used to lose weight between overweight, normal and underweight  
12 315 children were not apparent unlike other studies where unhealthier weight loss methods like  
13 316 skipping meals are reported more in overweight or obese children compared to normal weight  
14 317 children <sup>(22)</sup>. However, an effect of social desirability cannot be discounted, given that  
15 318 exercise as a healthy lifestyle choice is promoted early in the school curriculum  
16  
17

18 319 Body image must be taken into account when designing programmes to improve both body  
19 320 image and reduce unhealthy behaviours like unhealthy eating and reduced or excessive  
20 321 exercise<sup>(1)</sup>. Since public health programmes are generally targeted towards all, a general  
21 322 programme that caters to all children irrespective of their weight status is required.  
22  
23

24 323 **Strengths and limitations:** This is the first study to report perceptions of body weight in  
25 324 India in relation to weight loss attempts. A major strength of this study is that measured  
26 325 heights and weights rather than self-reported, were used and the study sample encompassed  
27 326 children of diverse socio-economic strata, from rural and urban areas and of a large body  
28 327 weight range. However, with the cross-sectional study design used in this study, the changes  
29 328 in perception as the children grow cannot be accounted for. Longitudinal evaluation of these  
30 329 children will allow us to establish causal links between weight perception and weight loss  
31 330 behaviours. Both the fact that the study was cross-sectional in nature, as well as the design of  
32 331 the questionnaire were limitations as information regarding the frequency, duration, and  
33 332 intensity of weight loss efforts, or time-sequence of events, that is, the time (recent/current or  
34 333 past) at which such behaviours occurred could not be obtained. Data on the reliability and  
35 334 validity of the questionnaire are not available for this population. With the question asked on  
36 335 attempt to lose weight being dichotomous, there is a possibility that a child who is currently  
37 336 normal weight may report weight loss behaviours because they were overweight in the past.  
38 337 The small numbers of children in each category in the analysis stratified by actual and  
39 338 perceived weight status necessitates further exploration with larger numbers of children in  
40 339 each category. A further limitation is that we have not collected data on attempt to gain  
41 340 weight.  
42  
43  
44  
45  
46  
47  
48  
49  
50  
51  
52  
53  
54  
55  
56  
57  
58  
59  
60

1  
2  
3 341  
4 342 Overall, perceptions of weight status influenced the decision of children to lose weight. **This**  
5 343 **needs to be further explored as a longitudinal study to establish causal links.** However,  
6 344 regardless of weight status, many children did resort to weight loss. Public health campaigns  
7 345 should emphasize healthy weight management rather than weight loss.  
8  
9  
10  
11

12 346

13  
14  
15 347 *Acknowledgements:* The authors thank Dr. Roopashree who helped in acquisition and entry  
16 348 of part of the data.  
17  
18

19 349 *Contributors:* MP, SS and MV were responsible for the concept and design of the study. SS  
20 350 drafted and the manuscript. MP acquired the data. Sumithra Selvam (SRS) performed the  
21 351 statistical analysis and interpreted the data. MV conceived the study and interpreted the data.  
22 352 All authors revised the manuscript critically for important intellectual content. SS is the  
23 353 guarantor.  
24  
25  
26  
27

28  
29 354 *Funding:* This research received no specific grant from any funding agency in the public,  
30 355 commercial or not-for-profit sectors.  
31

32 356 *Competing interests:* All authors have completed the Unified Competing Interest form at  
33 357 [www.icmje.org/coi\\_disclosure.pdf](http://www.icmje.org/coi_disclosure.pdf) (available on request from the corresponding author) and  
34 358 declare no support from any organisation for the submitted work; no financial relationships  
35 359 with any organisations that might have an interest in the submitted work in the previous 3  
36 360 years/ no other relationships or activities that could appear to have influence the submitted  
37 361 work.  
38  
39  
40  
41

42  
43 362 The Corresponding Author has the right to grant on behalf of all authors and does grant on  
44 363 behalf of all authors, an exclusive licence (or non exclusive for government employees) on a  
45 364 worldwide basis to the BMJ Publishing Group Ltd and its Licensees to permit this article (if  
46 365 accepted) to be published in BMJ editions and any other BMJ PGL products and sub-licences  
47 366 to exploit all subsidiary rights, as set out in your licence (  
48 367 <http://resources.bmj.com/bmj/authors/checklists-forms/licence-for-publication>)  
49  
50  
51  
52

53 368

54 369

55 370

56  
57  
58  
59  
60



371 **References:**

- 372 1. Grogan S. Body image and health: contemporary perspectives. *J Health Psychol*  
373 2006;11(4):523-30.
- 374 2. Pallan MJ, Hiam LC, Duda JL, Adab P. Body image, body dissatisfaction and weight  
375 status in South Asian children: a cross-sectional study. *BMC Public Health* 2011;11:21.
- 376 3. Maximova K, McGrath JJ, Barnett T, O'Loughlin J, Paradis G, Lambert M. Do you see  
377 what I see? Weight status misperception and exposure to obesity among children and  
378 adolescents. *Int J Obes (Lond)* 2008;32(6):1008-15.
- 379 4. Ceballos N, Czyzewska M. Body image in Hispanic/Latino vs. European American  
380 adolescents: implications for treatment and prevention of obesity in underserved  
381 populations. *J Health Care Poor Underserved* 2010;21(3):823-38.
- 382 5. Ayala GX, Mickens L, Galindo P, Elder JP. Acculturation and body image perception  
383 among Latino youth. *Ethn Health* 2007;12(1):21-41.
- 384 6. Cachelin FM, Rebeck RM, Chung GH, Pelayo E. Does ethnicity influence body-size  
385 preference? A comparison of body image and body size. *Obes Res* 2002;10(3):158-166.
- 386 7. Haff HR. Racial/Ethnic differences in weight perceptions and weight control behaviors  
387 among adolescent females. *Youth & Society* 2009;41(2):278-301.
- 388 8. Swami V, Frederick DA, Aavik T, Alcalay L, Allik J, Anderson D, et al. The attractive  
389 female body weight and female body dissatisfaction in 26 countries across 10 world  
390 regions: results of the international body project I. *Pers Soc Psychol Bull*  
391 2010;36(3):309-25.
- 392 9. Wang Y, Liang H, Chen X. Measured body mass index, body weight perception,  
393 dissatisfaction and control practices in urban, low-income African American adolescents.  
394 *BMC Public Health* 2009;9:183.
- 395 10. Ojala K, Vereecken C, Valimaa R, Currie C, Villberg J, Tynjala J, et al. Attempts to lose  
396 weight among overweight and non-overweight adolescents: a cross-national survey. *Int J*  
397 *Behav Nutr Phys Act* 2007;4:50.
- 398 11. Yan AF, Zhang G, Wang MQ, Stoesen CA, Harris BM. Weight perception and weight  
399 control practice in a multiethnic sample of US adolescents. *South Med J*  
400 2009;102(4):354-60.
- 401 12. Edwards NM, Pettingell S, Borowsky IW. Where perception meets reality: self-  
402 perception of weight in overweight adolescents. *Pediatrics* 2010;125(3):e452-8.
- 403 13. Martin MA, May AL, Frisco ML. Equal weights but different weight perceptions among  
404 US adolescents. *J Health Psychol* 2010;15(4):493-504.
- 405 14. Viner RM, Haines MM, Taylor SJ, Head J, Booy R, Stansfeld S. Body mass, weight  
406 control behaviours, weight perception and emotional well being in a multiethnic sample  
407 of early adolescents. *Int J Obes (Lond)* 2006;30(10):1514-21.
- 408 15. Pauline M, Selvam S, Swaminathan S, Vaz M. Body weight perception is associated  
409 with socio-economic status and current body weight in selected urban and rural South  
410 Indian school-going children. *Public Health Nutr* 2012:1-9.
- 411 16. de Onis M, Onyango AW, Borghi E, Siyam A, Nishida C, Siekmann J. Development of a  
412 WHO growth reference for school-aged children and adolescents. *Bull World Health*  
413 *Organ* 2007;85(9):660-7.
- 414 17. Stunkard AJ, Sorensen T, Schulsinger F. Use of the Danish Adoption Register for the  
415 study of obesity and thinness. In: Kety SS RL, Sidman RL, Matthysse SW, editor.  
416 *Genetics of Neurological and Psychiatric Disorders.*of Neurological and Psychiatric  
417 Disorders. New York: Raven Press; 1983. p. 115-120.
- 418 18. World Health Organization. Nutrition in adolescence. Issues and Challenges for the  
419 health sector. Discussion paper. Geneva: WHO; 2005.

- 1  
2  
3 420 19. Duncan JS, Duncan EK, Schofield G. Associations between weight perceptions, weight  
4 421 control and body fatness in a multiethnic sample of adolescent girls. *Public Health Nutr*  
5 422 2010;14(1):93-100.  
6 423 20. Neff LJ, Sargent RG, McKeown RE, Jackson KL, Valois RF. Black-white differences in  
7 424 body size perceptions and weight management practices among adolescent females. *J*  
8 425 *Adolesc Health* 1997;20(6):459-65.  
9 426 21. Alwan H, Viswanathan B, Paccaud F, Bovet P. Is Accurate Perception of Body Image  
10 427 Associated with Appropriate Weight-Control Behavior among Adolescents of the  
11 428 Seychelles. *J Obes* 2011;2011:817242.  
12 429 22. Boutelle K, Neumark-Sztainer D, Story M, Resnick M. Weight control behaviors among  
13 430 obese, overweight, and nonoverweight adolescents. *J Pediatr Psychol* 2002;27(6):531-40.  
14 431  
15 432  
16  
17  
18  
19  
20  
21  
22  
23  
24  
25  
26  
27  
28  
29  
30  
31  
32  
33  
34  
35  
36  
37  
38  
39  
40  
41  
42  
43  
44  
45  
46  
47  
48  
49  
50  
51  
52  
53  
54  
55  
56  
57  
58  
59  
60



1  
2  
3  
4  
5  
6  
7  
8  
9  
10  
11  
12  
13  
14  
15  
16  
17  
18  
19  
20  
21  
22  
23  
24  
25  
26  
27  
28  
29  
30  
31  
32  
33  
34  
35  
36  
37  
38  
39  
40  
41  
42  
43  
44  
45  
46  
47  
48  
49

Table 1. Socio-economic and anthropometric associations of weight loss behaviour

|                                | Attempted weight loss |           | Unadjusted OR<br>95% C.I. | P value*            | Adjusted † OR<br>Model 1<br>95% C.I. | P value‡            | Adjusted ¶ OR<br>Model 2<br>95% C.I. | P value‡            |        |
|--------------------------------|-----------------------|-----------|---------------------------|---------------------|--------------------------------------|---------------------|--------------------------------------|---------------------|--------|
|                                | Yes                   | No        |                           |                     |                                      |                     |                                      |                     |        |
| Gender                         | Girls                 | 387 (39%) | 616 (61%)                 | 1.41<br>1.16 – 1.72 | <0.001                               | 1.16<br>0.89 – 1.51 | 0.27                                 | 1.37<br>1.11 – 1.70 | 0.01   |
|                                | Boys                  | 268 (31%) | 603 (69%)                 | 1                   |                                      | 1                   |                                      |                     |        |
| Age category (years)           | <=10                  | 245 (34%) | 469 (66%)                 | 0.96<br>0.78 – 1.17 | 0.65                                 | 1.04<br>0.79 – 1.36 | 0.76                                 | 1.03<br>0.83 – 1.28 | 0.79   |
|                                | >10                   | 410 (35%) | 750 (65%)                 | 1                   |                                      | 1                   |                                      |                     |        |
| Location                       | City                  | 408 (33%) | 812 (67%)                 | 0.83<br>0.68 – 1.01 | 0.06                                 | 1.03<br>0.78 – 1.36 | 0.81                                 | -                   | -      |
|                                | Non City              | 247 (38%) | 407 (62%)                 | 1                   |                                      | 1                   |                                      |                     |        |
| Education of mother (Standard) | Up to 7 <sup>th</sup> | 146 (34%) | 278 (66%)                 | 0.95<br>0.75 – 1.22 | 0.69                                 | 0.81<br>0.58 – 1.14 | 0.22                                 | -                   | -      |
|                                | > 7 <sup>th</sup>     | 400 (36%) | 727 (65%)                 | 1                   |                                      | 1                   |                                      |                     |        |
| Education of father (Standard) | Up to 7 <sup>th</sup> | 161 (39%) | 256 (61%)                 | 1.21<br>0.95 – 1.53 | 0.10                                 | 1.24<br>0.87-1.78   | 0.22                                 | -                   | -      |
|                                | > 7 <sup>th</sup>     | 437 (34%) | 838 (66%)                 | 1                   |                                      | 1                   |                                      |                     |        |
| Medium of instruction          | Kannada               | 198 (39%) | 308 (61%)                 | 1.28<br>1.03- 1.59  | 0.02                                 | 1.57<br>1.11 – 2.25 | 0.01                                 | 1.52<br>1.20 – 1.92 | <0.001 |
|                                | English <sup>1</sup>  | 457(33%)  | 911 (67%)                 | 1                   |                                      | 1                   |                                      |                     |        |

|                                           |           |           |             |        |             |        |             |        |  |
|-------------------------------------------|-----------|-----------|-------------|--------|-------------|--------|-------------|--------|--|
| Actual weight status                      |           |           |             |        |             |        |             |        |  |
| Underweight                               | 98 (22%)  | 352 (78%) | 0.52        | <0.001 | 0.71        | 0.04   | 0.66        |        |  |
|                                           |           |           | 0.40 – 0.67 |        | 0.51 – 0.98 |        | 0.50 – 0.86 | 0.002  |  |
| Overweight                                | 125 (73%) | 47 (27%)  | 4.96        | <0.001 | 4.38        | <0.001 | 3.86        |        |  |
|                                           |           |           | 3.43 – 7.20 |        | 2.64 – 7.28 |        | 2.63 – 5.64 | <0.001 |  |
| Normal                                    | 412 (35%) | 769 (65%) | 1           |        | 1           |        |             |        |  |
| Child's perception of body image          |           |           |             |        |             |        |             |        |  |
| Too /A little Thin                        | 133 (23%) | 457 (77%) | 0.61        | <0.001 | 0.67        | 0.01   | 0.64        | <0.001 |  |
|                                           |           |           | 0.48 – 0.77 |        | 0.49 – 0.93 |        | 0.49 – 0.82 |        |  |
| A little /Too fat                         | 195 (68%) | 91 (32%)  | 4.48        | <0.001 | 2.91        | <0.001 | 3.48        | <0.001 |  |
|                                           |           |           | 3.35 – 6.00 |        | 1.95 – 4.34 |        | 2.57 – 4.69 |        |  |
| Normal                                    | 318 (32%) | 665 (68%) | 1           |        | 1           |        |             |        |  |
| Child's desire to be                      |           |           |             |        |             |        |             |        |  |
| A lot /Slightly fatter                    | 114 (25%) | 347 (75%) | 0.76        | 0.03   | 0.84        | 0.35   |             |        |  |
|                                           |           |           | 0.58 – 0.98 |        | 0.59 – 1.20 |        |             |        |  |
| Slightly/Much thinner                     | 260(52%)  | 237 (48%) | 2.53        | <0.001 | 1.56        | 0.006  | -           | -      |  |
|                                           |           |           | 2.00 – 3.19 |        | 1.14 – 2.15 |        |             |        |  |
| Same as at present                        | 272 (30%) | 627 (70%) | 1           |        | 1           |        |             |        |  |
| Parent's perception of child's body image |           |           |             |        |             |        |             |        |  |
| Too /A little Thin                        | 66 (22%)  | 241 (79%) | 0.52        | <0.001 | 0.76        | 0.15   |             |        |  |
|                                           |           |           | 0.38 – 0.71 |        | 0.52 – 1.12 |        | -           | -      |  |
| A little /Too fat                         | 95 (54%)  | 82 (46%)  | 2.20        | <0.001 | 0.86        |        |             |        |  |
|                                           |           |           | 1.58 – 3.08 |        | 0.51 – 1.37 | 0.51   |             |        |  |
| Normal                                    | 364 (35%) | 690 (66%) | 1           |        | 1           |        |             |        |  |
| Parent's desire for child to be           |           |           |             |        |             |        |             |        |  |
| A lot /Slightly fatter                    | 87 (21%)  | 331 (79%) | 0.54        | <0.001 | 0.75        | 0.11   |             |        |  |
|                                           |           |           | 0.41- 0.72  |        | 0.52 – 1.07 |        | -           | -      |  |
| Slightly /Much thinner                    | 170 (56%) | 134 (44%) | 2.61        | <0.001 | 1.79        |        |             |        |  |
|                                           |           |           | 1.98 – 3.46 |        | 1.25 – 2.58 | 0.002  |             |        |  |
| Same as at present                        | 263 (33%) | 542 (67%) | 1           |        | 1           |        |             |        |  |

Results are reported as Number (percentages); OR – Odds Ratio; 95% C.I. – 95% Confidence Interval

\*Fisher's Exact test or Chi square test

1  
2  
3  
4  
5  
6  
7  
8  
9  
10  
11  
12  
13  
14  
15  
16  
17  
18  
19  
20  
21  
22  
23  
24  
25  
26  
27  
28  
29  
30  
31  
32  
33  
34  
35  
36  
37  
38  
39  
40  
41  
42  
43  
44  
45  
46  
47  
48  
49

† Adjusted for actual BMI status, child’s and parents perception of body weight and socio-demographic factors  
‡ Obtained by fitting binary logistic regression model. Model 1: Adjusted for socio-demographic variables and actual and perceived weight  
¶ Obtained by fitting binary logistic regression model. Model 2: Adjusted for age, gender, medium of instruction, actual weight status and child’s perception of body weight.

For peer review only

1  
2  
3  
4  
5  
6  
7  
8 **Figure Legends:**  
9

10 **Figure 1: Odds ratio of having tried to lose body weight in children classified by current**  
11 **weight status and perception of body weight.** ■ Comparison of child's actual weight

12 status with child's perception of weight status □ Comparison of child's actual weight  
13 status with parental perception of weight status. U/U: underweight by actual  
14 measurements/child's or parent's perception of being underweight, U/N: underweight by  
15 actual measurements/child's or parent's perception of being normal, N/U- normal by actual  
16 measurements/perceived by child/parent to be underweight, N/N: normal by actual  
17 measurements/child's or parent's perception of being normal, N/O: normal by actual  
18 measurements/child's or parent's perception of being overweight, O/N: overweight by actual  
19 measurements/child's or parent's perception of being normal, O/O: overweight by actual  
20 measurements/child's or parent's perception of being overweight, O/U: overweight by actual  
21 measurements/child's or parent's perception of being underweight.  
22  
23  
24  
25  
26  
27  
28  
29  
30  
31  
32

33 **Figure 2a and 2b: Prevalence of attempting to lose weight by gender and age category**  
34 **based on actual weight status and children and parent's perception of child's body**  
35 **weight. UW – Underweight, OW – Overweight**  
36  
37  
38  
39

40 **Figure 3: Actual weight status and weight loss practices of children**

41  
42 ■ Exercise ■ Reduced quantity of food eaten ■ Stopped eating certain kind of foods  
43 □ Skipping meals  
44  
45  
46  
47  
48  
49  
50  
51  
52  
53  
54  
55  
56  
57  
58  
59  
60

STROBE 2007 (v4) Statement—Checklist of items that should be included in reports of *cross-sectional studies*

| Section/Topic                | Item # | Recommendation                                                                                                                                                                       | Reported on page #    |
|------------------------------|--------|--------------------------------------------------------------------------------------------------------------------------------------------------------------------------------------|-----------------------|
| Title and abstract           | 1      | (a) Indicate the study's design with a commonly used term in the title or the abstract                                                                                               | 2                     |
|                              |        | (b) Provide in the abstract an informative and balanced summary of what was done and what was found                                                                                  | 2                     |
| <b>Introduction</b>          |        |                                                                                                                                                                                      |                       |
| Background/rationale         | 2      | Explain the scientific background and rationale for the investigation being reported                                                                                                 | 3 and 4               |
| Objectives                   | 3      | State specific objectives, including any prespecified hypotheses                                                                                                                     | 4                     |
| <b>Methods</b>               |        |                                                                                                                                                                                      |                       |
| Study design                 | 4      | Present key elements of study design early in the paper                                                                                                                              | 4                     |
| Setting                      | 5      | Describe the setting, locations, and relevant dates, including periods of recruitment, exposure, follow-up, and data collection                                                      | 4                     |
| Participants                 | 6      | (a) Give the eligibility criteria, and the sources and methods of selection of participants                                                                                          | 4                     |
| Variables                    | 7      | Clearly define all outcomes, exposures, predictors, potential confounders, and effect modifiers. Give diagnostic criteria, if applicable                                             | 4 and 5               |
| Data sources/<br>measurement | 8*     | For each variable of interest, give sources of data and details of methods of assessment (measurement). Describe comparability of assessment methods if there is more than one group | 4 and 5               |
| Bias                         | 9      | Describe any efforts to address potential sources of bias                                                                                                                            | <i>Not applicable</i> |
| Study size                   | 10     | Explain how the study size was arrived at                                                                                                                                            | 4                     |
| Quantitative variables       | 11     | Explain how quantitative variables were handled in the analyses. If applicable, describe which groupings were chosen and why                                                         | 5                     |
| Statistical methods          | 12     | (a) Describe all statistical methods, including those used to control for confounding                                                                                                | 5 and 6               |
|                              |        | (b) Describe any methods used to examine subgroups and interactions                                                                                                                  | 5 and 6               |
|                              |        | (c) Explain how missing data were addressed                                                                                                                                          | Not applicable        |
|                              |        | (d) If applicable, describe analytical methods taking account of sampling strategy                                                                                                   | -                     |
|                              |        | (e) Describe any sensitivity analyses                                                                                                                                                | Not applicable        |
| <b>Results</b>               |        |                                                                                                                                                                                      |                       |

|                          |     |                                                                                                                                                                                                              |                |
|--------------------------|-----|--------------------------------------------------------------------------------------------------------------------------------------------------------------------------------------------------------------|----------------|
| Participants             | 13* | (a) Report numbers of individuals at each stage of study—eg numbers potentially eligible, examined for eligibility, confirmed eligible, included in the study, completing follow-up, and analysed            | 5              |
|                          |     | (b) Give reasons for non-participation at each stage                                                                                                                                                         | 5              |
|                          |     | (c) Consider use of a flow diagram                                                                                                                                                                           | Not used       |
| Descriptive data         | 14* | (a) Give characteristics of study participants (eg demographic, clinical, social) and information on exposures and potential confounders                                                                     | 5              |
|                          |     | (b) Indicate number of participants with missing data for each variable of interest                                                                                                                          | 5              |
| Outcome data             | 15* | Report numbers of outcome events or summary measures                                                                                                                                                         | 5 and 6        |
| Main results             | 16  | (a) Give unadjusted estimates and, if applicable, confounder-adjusted estimates and their precision (eg, 95% confidence interval). Make clear which confounders were adjusted for and why they were included | 6,7,12,13      |
|                          |     | (b) Report category boundaries when continuous variables were categorized                                                                                                                                    | 5              |
|                          |     | (c) If relevant, consider translating estimates of relative risk into absolute risk for a meaningful time period                                                                                             | Not applicable |
| Other analyses           | 17  | Report other analyses done—eg analyses of subgroups and interactions, and sensitivity analyses                                                                                                               | Not applicable |
| <b>Discussion</b>        |     |                                                                                                                                                                                                              |                |
| Key results              | 18  | Summarise key results with reference to study objectives                                                                                                                                                     | 7 and 8        |
| Limitations              | 19  | Discuss limitations of the study, taking into account sources of potential bias or imprecision. Discuss both direction and magnitude of any potential bias                                                   | Not applicable |
| Interpretation           | 20  | Give a cautious overall interpretation of results considering objectives, limitations, multiplicity of analyses, results from similar studies, and other relevant evidence                                   | 7, 8 and 9     |
| Generalisability         | 21  | Discuss the generalisability (external validity) of the study results                                                                                                                                        | 9              |
| <b>Other information</b> |     |                                                                                                                                                                                                              |                |
| Funding                  | 22  | Give the source of funding and the role of the funders for the present study and, if applicable, for the original study on which the present article is based                                                | 9              |

\*Give information separately for cases and controls in case-control studies and, if applicable, for exposed and unexposed groups in cohort and cross-sectional studies.

**Note:** An Explanation and Elaboration article discusses each checklist item and gives methodological background and published examples of transparent reporting. The STROBE checklist is best used in conjunction with this article (freely available on the Web sites of PLoS Medicine at <http://www.plosmedicine.org/>, Annals of Internal Medicine at <http://www.annals.org/>, and Epidemiology at <http://www.epidem.com/>). Information on the STROBE Initiative is available at [www.strobe-statement.org](http://www.strobe-statement.org).

1  
2  
3  
4  
5  
6  
7  
8  
9  
10  
11  
12  
13  
14  
15  
16  
17  
18  
19  
20  
21  
22  
23  
24  
25  
26  
27  
28  
29  
30  
31  
32  
33  
34  
35  
36  
37  
38  
39  
40  
41  
42  
43  
44  
45  
46  
47  
48  
49  
50  
51  
52  
53  
54  
55  
56  
57  
58  
59  
60

**FIGURE 1: ODDS RATIO OF ATTEMPTING TO LOSE WEIGHT IN CHILDREN CLASSIFIED BY CURRENT WEIGHT STATUS OF CHILDREN WITH CHILD'S AND PARENT'S PERCEPTION OF CHILD'S BODY WEIGHT**

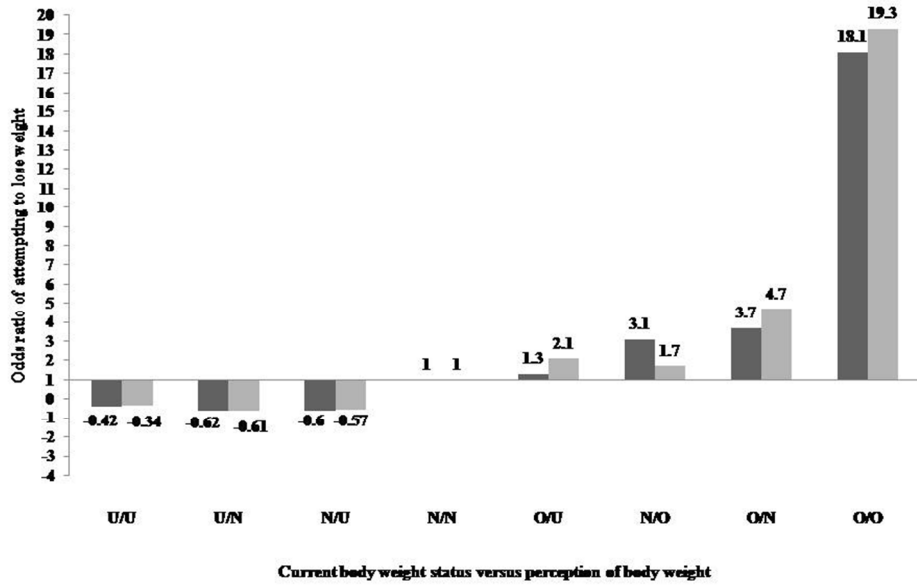

254x190mm (96 x 96 DPI)

Review only

**FIGURE 2A: PREVALENCE OF ATTEMPTING TO LOSE WEIGHT BY GENDER AND AGE CATEGORY BASED ON ACTUAL WEIGHT STATUS AND CHILD'S PERCEPTION OF BODY WEIGHT**

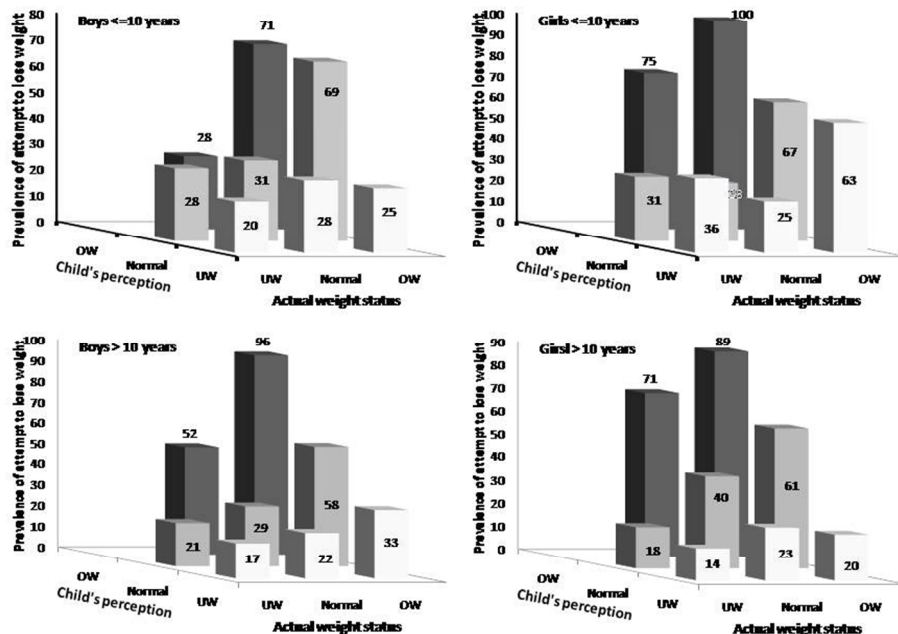

254x190mm (96 x 96 DPI)

View only



1  
2  
3  
4  
5  
6  
7  
8  
9  
10  
11  
12  
13  
14  
15  
16  
17  
18  
19  
20  
21  
22  
23  
24  
25  
26  
27  
28  
29  
30  
31  
32  
33  
34  
35  
36  
37  
38  
39  
40  
41  
42  
43  
44  
45  
46  
47  
48  
49  
50  
51  
52  
53  
54  
55  
56  
57  
58  
59  
60

**FIGURE 2B: PREVALENCE OF ATTEMPTING TO LOSE WEIGHT BY GENDER AND AGE CATEGORY BASED ON ACTUAL WEIGHT STATUS AND PARENT'S PERCEPTION OF BODY WEIGHT**

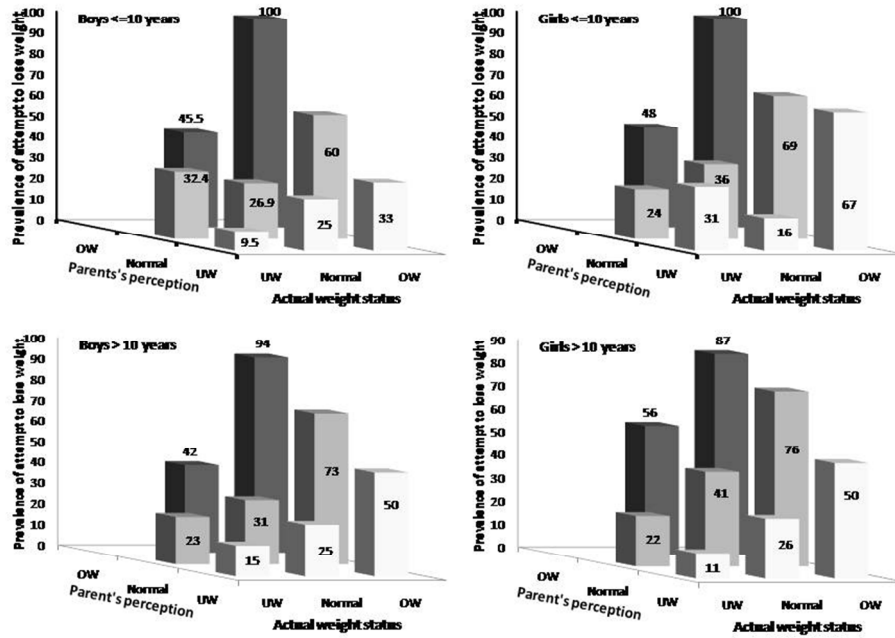

254x190mm (96 x 96 DPI)

Review only

Figure 2: Actual weight status and weight loss practices of children

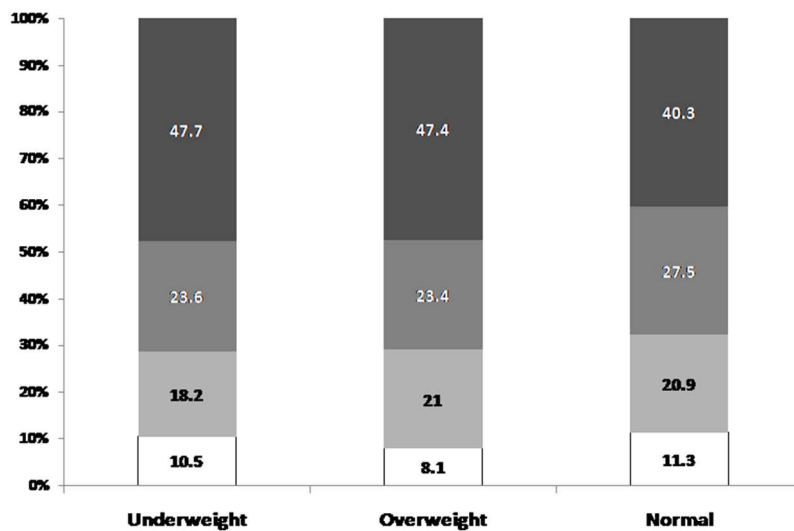

254x190mm (96 x 96 DPI)

Review only

1  
2  
3  
4  
5  
6  
7  
8  
9  
10  
11  
12  
13  
14  
15  
16  
17  
18  
19  
20  
21  
22  
23  
24  
25  
26  
27  
28  
29  
30  
31  
32  
33  
34  
35  
36  
37  
38  
39  
40  
41  
42  
43  
44  
45  
46  
47  
48  
49  
50  
51  
52  
53  
54  
55  
56  
57  
58  
59  
60

**Supplementary Table 1: Correlation matrix of actual weight status, child's and parent's perception of child's present weight and desired weight status**

|                                            | Actual weight status | Child's perception of body weight | Child's desired weight status | Parent's perception of child's body weight | Parents desired for child's weight status |
|--------------------------------------------|----------------------|-----------------------------------|-------------------------------|--------------------------------------------|-------------------------------------------|
| Actual weight status                       | 1                    |                                   |                               |                                            |                                           |
| Child's perception of body weight          | 0.26                 | 1                                 |                               |                                            |                                           |
| Child's desired weight status              | 0.15                 | 0.21                              | 1                             |                                            |                                           |
| Parent's perception of child's body weight | 0.17                 | 0.30                              | 0.12                          | 1                                          |                                           |
| Parents desired for child's weight status  | 0.18                 | 0.19                              | 0.31                          | 0.28                                       | 1                                         |

**Supplementary Table 2: Prevalence of attempt to lose weight by gender and age category:**

|                                           | Attempt to lose weight |             |             |            | P value* |
|-------------------------------------------|------------------------|-------------|-------------|------------|----------|
|                                           | Boys                   |             | Girls       |            |          |
|                                           | <=10                   | >10         | <=10        | >10        |          |
| <b>Actual weight status</b>               |                        |             |             |            |          |
| Underweight                               | 19 (25.0)              | 36 (20.2)†  | 23 (32.4)‡  | 20 (16.0)  | 0.002    |
| Overweight                                | 20 (64.5)              | 30 (78.9)   | 24 (72.7)   | 51 (72.9)  | 0.89     |
| Normal                                    | 60 (29.3)              | 96 (30.7)   | 92 (34.3)   | 164 (41.5) | -        |
| <b>Child's perception of body weight</b>  |                        |             |             |            |          |
| Too thin/Little thin                      | 24 (23.5)              | 38 (20.4) † | 40 (29.0) : | 31 (18.9)  | 0.006    |
| Too fat/little fat                        | 21 (46.7)              | 49 (63.6)   | 41 (78.8)   | 84 (75.0)  | 0.25     |
| Normal                                    | 55 (30.9)              | 76 (27.5)   | 62 (32.1)   | 125 (37.2) | -        |
| <b>Parent's perception of body weight</b> |                        |             |             |            |          |
| Too thin/Little thin                      | 9 (18.0)               | 21(21.0)    | 14 (25.5)   | 22 (21.6)  | 0.60     |
| Too fat/little fat                        | 10 (47.6)              | 32 (48.5)   | 15 (48.4)   | 38 (64.4)  | 0.17     |
| Normal                                    | 51 (29.1)              | 88 (30.4)   | 82 (36.0)   | 143 (39.5) | -        |

Reported as number and within parenthesis percentages; \*Fisher's Exact test or Chi square test;  
 †Among older/younger age group children significant difference between boys and girls  
 ‡ Among girls significant difference between the younger and older age group children  
 p values for O/U not reported due to small numbers.

(Supplementary) Table 3: Odds ratio of attempting to lose weight in comparison to actual weight status of the children and the child's perception of body weight

| Actual BMI       | Child's Perception of body weight | Attempted weight loss |     | Unadjusted OR<br>95% C.I. | P value* | Adjusted†<br>OR<br>95% C.I. | P value‡ |
|------------------|-----------------------------------|-----------------------|-----|---------------------------|----------|-----------------------------|----------|
|                  |                                   | Yes                   | No  |                           |          |                             |          |
| Normal           | Overweight/Obese                  | 105                   | 67  | 3.1<br>2.22 – 4.58        | <0.001   | 3.1<br>2.2 -4.42            | <0.001   |
| Overweight/Obese | Overweight/Obese                  | 74                    | 9   | 16.7<br>7.93 – 36.54      | <0.001   | 18.1<br>8.8 -36.9           | <0.001   |
| Overweight/Obese | Normal                            | 43                    | 25  | 3.5<br>2.03 – 6.08        | <0.001   | 3.7<br>2.2 – 6.2            | <0.001   |
| Overweight/Obese | Underweight                       | 8                     | 12  | 1.36<br>0.50 – 3.62       | 0.50     | 1.37<br>0.55 – 3.4          | 0.50     |
| Underweight      | Underweight                       | 30                    | 123 | 0.50<br>0.32 – 0.78       | <0.001   | 0.49<br>0.32-0.77           | 0.001    |
| Underweight      | Normal                            | 67                    | 226 | 0.60<br>0.43 – 0.84       | 0.001    | 0.62<br>0.45 – 0.86         | 0.004    |
| Normal           | Underweight                       | 81                    | 254 | 0.65<br>0.48 – 0.88       | 0.004    | 0.60<br>0.45 – 0.82         | 0.001    |
| Normal           | Normal                            | 219                   | 446 | 1                         |          | 1                           |          |

Results are reported as Number and %; OR – Odds Ratio; 95% C.I. – 95% Confidence Interval

\*Fisher's Exact test or Chi square test

†Adjusted for age, gender and medium of instruction

‡‡ Obtained by fitting binary logistic regression models

(Supplementary) Table 4: Odds ratio of attempting to lose weight in comparison to actual weight status of the children and the parent's perception of child's body weight

| Actual BMI status of the children | Parent's Perception of body weight | Attempted weight loss |     | Unadjusted OR<br>95% C.I. | P Value* | Adjusted †<br>OR<br>95% C.I. | P value‡ |
|-----------------------------------|------------------------------------|-----------------------|-----|---------------------------|----------|------------------------------|----------|
|                                   |                                    | Yes                   | No  |                           |          |                              |          |
| Normal                            | Overweight/Obese                   | 43                    | 47  | 1.69<br>1.07 – 2.69       | 0.01     | 1.74<br>1.1 – 2.7            | 0.01     |
| Overweight/Obese                  | Overweight/Obese                   | 40                    | 4   | 18.5<br>6.25 – 61.63      | <0.001   | 19.3<br>6.8- 54.8            | <0.001   |
| Overweight/Obese                  | Normal                             | 50                    | 21  | 4.4<br>2.52 – 7.77        | <0.001   | 4.7<br>2.7 – 8.0             | <0.001   |
| Overweight/Obese                  | Underweight                        | 10                    | 9   | 2.06<br>0.76 – 5.58       | 0.11     | 2.17<br>0.87 – 5.4           | 0.10     |
| Underweight                       | Underweight                        | 18                    | 102 | 0.33<br>0.19 – 0.57       | <0.001   | 0.34<br>0.20 – 0.57          | <0.001   |
| Underweight                       | Normal                             | 58                    | 181 | 0.59<br>0.42 – 0.84       | 0.001    | 0.61<br>0.44 – 0.86          | 0.004    |
| Normal                            | Underweight                        | 37                    | 121 | 0.57<br>0.37 – 0.86       | 0.004    | 0.57<br>0.38 – 0.84          | 0.005    |
| Normal                            | Normal                             | 257                   | 476 | 1                         |          | 1                            |          |

Results are reported as Number and %; OR – Odds Ratio; 95% C.I. – 95% Confidence Interval

\* Fisher's Exact test or Chi square test

† Adjusted for age, gender and medium of instruction

‡ Obtained by fitting binary logistic regression models



**ASSOCIATIONS BETWEEN BODY WEIGHT PERCEPTIONS  
AND WEIGHT CONTROL BEHAVIORS IN SOUTH INDIAN  
CHILDREN– A CROSS-SECTIONAL STUDY**

|                                    |                                                                                                                                                                                                                                                                                                                                                                                                                         |
|------------------------------------|-------------------------------------------------------------------------------------------------------------------------------------------------------------------------------------------------------------------------------------------------------------------------------------------------------------------------------------------------------------------------------------------------------------------------|
| Journal:                           | <i>BMJ Open</i>                                                                                                                                                                                                                                                                                                                                                                                                         |
| Manuscript ID:                     | bmjopen-2012-002239.R2                                                                                                                                                                                                                                                                                                                                                                                                  |
| Article Type:                      | Research                                                                                                                                                                                                                                                                                                                                                                                                                |
| Date Submitted by the Author:      | 01-Feb-2013                                                                                                                                                                                                                                                                                                                                                                                                             |
| Complete List of Authors:          | Swaminathan, Sumathi; St John's Research Institute, Division of Nutrition<br>Selvam, Sumithra; St John's Research Institute, Department of<br>Epidemiology and Biostatistics<br>Maria, Pauline; St John's Medical College and Hospital, Department of<br>Physiology<br>Vaz, Mario; St John's Medical College and Hospital, Department of<br>Physiology; St John's Research Institute, Division of Humanities and Health |
| <b>Primary Subject<br>Heading</b>: | Public health                                                                                                                                                                                                                                                                                                                                                                                                           |
| Secondary Subject Heading:         | Nutrition and metabolism, Paediatrics                                                                                                                                                                                                                                                                                                                                                                                   |
| Keywords:                          | Community child health < PAEDIATRICS, PUBLIC HEALTH, EPIDEMIOLOGY,<br>Cross Sectional Study, INDIA                                                                                                                                                                                                                                                                                                                      |
|                                    |                                                                                                                                                                                                                                                                                                                                                                                                                         |

SCHOLARONE™  
Manuscripts

Only

1  
2  
3 1 ASSOCIATIONS BETWEEN BODY WEIGHT PERCEPTION AND WEIGHT CONTROL  
4 2 BEHAVIOR IN SOUTH INDIAN CHILDREN– A CROSS-SECTIONAL STUDY  
5

6 3 Sumathi Swaminathan *Assistant Professor Division of Nutrition*<sup>1</sup>, Sumithra Selvam *Lecturer*  
7 4 *Division of Biostatistics and Epidemiology*<sup>1</sup>, Maria Pauline *Assistant Professor, Department*  
8 5 *of Physiology*<sup>2</sup>, Mario Vaz *Professor Department of Physiology and Division of Humanities*  
9 6 *and Health*<sup>1,2</sup>

7 1<sup>1</sup>St. John's Research Institute, St John's National Academy of Health Sciences, Koramangala,  
8 8 Bangalore- 560 034, Karnataka, India; <sup>2</sup> St.John's Medical College & Hospital, St. John's  
9 9 National Academy of Health Sciences, Koramangala, Bangalore- 560 034, Karnataka, India  
10  
11  
12  
13  
14  
15  
16  
17  
18  
19  
20  
21  
22

13 13 Correspondence to: Sumathi Swaminathan  
14 14 E-mail: sumathi@sjri.res.in  
15 15 St John's Research Institute,  
16 16 St John's national Academy of Health Sciences,  
17 17 Koramangala, Bangalore: 560 034  
18 18 Karnataka, India  
19  
20  
21  
22  
23

23 23 Short title: Body weight perception influences weight loss in South Indian children  
39  
40  
41  
42  
43  
44  
45  
46  
47  
48  
49  
50  
51  
52  
53  
54  
55  
56  
57  
58  
59  
60

24

25 **Abstract:**

26 **Objective:** To examine the patterns of weight loss behaviour, and the association between  
27 weight loss attempts with actual weight status, and children's and parental perceptions of  
28 weight status.

29 **Design:** Cross sectional study

30 **Setting:** Karnataka, South India

31 **Participants:** 1874 girls and boys aged 8 to 14 years from 7 schools in Karnataka, South  
32 India

33 **Main outcome measures:** The association between weight loss attempts and socio-  
34 demographic factors, weight status and the child or parent's perception of weight status.

35 **Results:** Approximately 73% of overweight and obese, 35% of normal weight and 22% of  
36 underweight children attempted to lose weight. Children of lower socio-economic groups  
37 studying in schools in the local vernacular and overweight/obese children were more likely to  
38 attempt to lose weight (Adjusted odds ratio or AOR=1.57, 95% CI: 1.11 to 2.25; AOR= 4.38,  
39 95% CI: 2.64 to 7.28, respectively). Perception of weight status was associated with weight  
40 loss attempts. Thus, children who were normal weight but perceived themselves to be  
41 overweight / obese were three times more likely to attempt weight loss compared with those  
42 who accurately perceived themselves as normal weight, while the odds of attempting weight  
43 loss were the highest for those who were overweight and perceived themselves to be so  
44 (AOR ~ 18).

45 **Conclusions:** Children are likely to attempt weight loss in India irrespective of their weight  
46 status, age and gender. Children who were actually overweight as well as those who were  
47 perceived by themselves or by their parents to be overweight or obese were highly likely to  
48 try to lose weight. It is necessary to understand body weight perceptions in communities with  
49 a dual burden of overweight and under-nutrition, if intervention programmes for either are to  
50 be successful.

51

52



1  
2  
3  
4  
5  
6  
7  
8  
9  
10  
11  
12  
13  
14  
15  
16  
17  
18  
19  
20  
21  
22  
23  
24  
25  
26  
27  
28  
29  
30  
31  
32  
33  
34  
35  
36  
37  
38  
39  
40  
41  
42  
43  
44  
45  
46  
47  
48  
49  
50  
51  
52  
53  
54  
55  
56  
57  
58  
59  
60

#### ARTICLE FOCUS:

- To explore weight loss behaviour patterns and association between weight loss attempts with socio-demographic factors, actual as well as children's and parental perceptions of child's weight status.

#### KEY MESSAGES

- In India, where both overweight and underweight in children co-exist; there are no data on the associations of body weight perceptions of children in relation to weight loss attempts. It is essential to understand this association in order to tailor suitable intervention programmes that can work in communities with concurrent under- and over-nutrition.
- Weight loss is attempted by children irrespective of weight status, age and gender. However, there are higher odds of attempting to lose weight among those who perceive themselves to be overweight, although their weight status may be normal.

#### STRENGTHS AND LIMITATIONS

- This is the first study to report perceptions of body weight in India in relation to weight loss attempts.
- The cross-sectional study design used in this study, allows only associations to be assessed.

53

54

55

1  
2  
3 56 **INTRODUCTION:**  
4  
5

6 57 Body image is a psycho-social dimension of body size that encompasses both perceptual and  
7 58 attitudinal factors <sup>(1)</sup> and has been associated with eating disorders<sup>(1, 2)</sup>. In recent years, its  
8 59 association with overweight and obesity has been described <sup>(3)</sup>. It is recognised that  
9 60 individuals make decisions on lifestyle behaviours based on body weight perceptions (a  
10 61 dimension of body image) <sup>(1, 4)</sup>. In India, there is a large burden of under-nutrition alongside  
11 62 increasing overweight and obesity <sup>(4)</sup>. For public health and clinical programmes to be more  
12 63 effective, body image of undernourished and overweight children should be understood in the  
13 64 context of the influence of culture on body weight perceptions and on weight management  
14 65 behaviours.

15  
16  
17  
18  
19  
20  
21  
22 66 A large number of studies have indicated that children and adolescents misperceive their  
23 67 body weight status <sup>(5-10)</sup>. Interventions that address socio-cultural attitudes towards  
24 68 appearance should ideally reduce body image dissatisfaction as well as overweight and  
25 69 obesity since studies have indicated a relationship between body image, unhealthy eating  
26 70 practices and obesity <sup>(11, 12)</sup>. Perceptions of body weight are, in part, influenced by external  
27 71 factors including cultural norms and social preferences as it has been observed that Asian  
28 72 women have less body dissatisfaction than other ethnic groups <sup>(13)</sup>. In India, it is often  
29 73 believed that an overweight person is wealthier and happier and reflects social mobility to a  
30 74 higher status compared to an underweight person, although there are no studies to corroborate  
31 75 this. The disconnect between actual weight and perception of body size could stem from the  
32 76 extent to which individuals identify with the majority cultural standards of beauty<sup>(14)</sup>. There  
33 77 are also reports that individuals in less socio-economically developed societies positively  
34 78 evaluate overweight and obese figures <sup>(6)</sup>. Evidence also suggests associations of actual body  
35 79 weight, body weight perceptions and weight dissatisfaction with weight control practices;  
36 80 overweight children are more likely to try to lose weight compared to non-overweight  
37 81 children <sup>(7, 15)</sup>. Analysis of data from the National Health and Nutrition Examination Survey  
38 82 (NHANES) <sup>(16)</sup> and the Youth Risk Behaviour Surveillance Survey (YRBSS) <sup>(14, 17)</sup> indicate  
39 83 that those overweight children who perceived their weight status correctly were more likely  
40 84 to exercise or eat less for weight control. Results from an analysis from Europe, Israel and  
41 85 North America as part of the Health Behaviour in School aged Children (HBSC) 2001/2002  
42 86 survey indicated that weight and age were significant factors associated with current attempts  
43 87 to lose weight <sup>(15)</sup>.

1  
2  
3 88 For healthy weight management it is necessary for a person to perceive his or her weight  
4 89 status accurately as well as be aware of healthy methods to lose or gain weight. Most  
5 90 literature on body weight perceptions and weight control behaviours are related to studies  
6 91 done in developed countries<sup>(5, 7, 14, 16)</sup> with a few on ethnic minorities, including South Asians  
7 92<sup>(3, 10)</sup>. The present analysis aims to examine the associations between the actual weight  
8 93 status, body weight perceptions of both children and their parents, and body weight  
9 94 satisfaction with weight loss intentions. The study sample included a wide range of body  
10 95 weights to reflect the dual burden of under-nutrition and overweight/obesity that India  
11 96 currently faces.

## 19 **METHODS:**

### 21 **Study population:**

23 99 A total of 2083 school children aged 8 to 14 years from 7 schools of varying socio-  
24 100 economic status located in rural areas, towns in Karnataka and urban Bangalore in South  
25 101 India, were contacted at baseline out of which 1907 (91.6%) children participated in a  
26 102 longitudinal study on body image perceptions and growth indices of school children, details  
27 103 of which are published earlier<sup>(18)</sup>. Convenience sampling of 7 city and non-city (rural and  
28 104 small towns) co-educational, non-residential schools was employed, such that children  
29 105 representing various socio-economic statuses (based on school fees linked to medium of  
30 106 instruction) were recruited. Of these schools, 2 were located in villages, 3 in small towns and  
31 107 2 in Bangalore city. The schools in which Kannada, the regional state language, was the  
32 108 language of instruction, received government support and had annual tuition fees of Rs.250 to  
33 109 500 whereas English medium schools did not receive government support and had annual  
34 110 tuition fees of above Rs.6000. Hence the medium of instruction in schools was used as an  
35 111 indicator of socio-economic status (SES). Three schools (1 each in a village, small town and  
36 112 city) had Kannada as the medium of instruction while four schools (1 in a village, 2 in small  
37 113 towns and 1 in the city) had English as the medium of instruction.

38 114 The sample recruited had adequate power (above 80 %) to identify the significant socio-  
39 115 demographic predictors for perception of body image in the present study and to estimate a  
40 116 difference of at least 10% over-estimation or under-estimation of body weight at 5% level of  
41 117 significance. Ethical approval was obtained from the Institutional Ethical Review Board.

1  
2  
3 118 Principals of schools were contacted for permission to conduct the study in their schools.  
4 119 Written parental consent and assent from the child was also obtained. A questionnaire to  
5 120 assess body image perception was administered by an investigator (MP) to all the consenting  
6 121 students in a class by reading aloud the questions in either English or Kannada (the local  
7 122 language). Responses were marked on the questionnaire by each child. A short questionnaire  
8 123 in English or the local language to be filled by one of the parents was sent home after the  
9 124 children completed their questionnaires. Children whose parents were illiterate (6.7%  
10 125 mothers, 5.9% fathers), elicited the answers from either of their parents and filled up the  
11 126 questionnaire.

### 127 **Measurements:**

128 Height was measured using a fibreglass tape without foot wear to 0.2 cm. Weight was  
129 measured in school uniforms but without shoes using a calibrated digital scale (Home Health,  
130 Model 8604, Dr. Morepen Lab, Hong Kong) to the nearest 100 gm. All measurements were  
131 made using a standardized protocol. Body mass index (BMI) was computed and the BMI-  
132 for-age Z score values were obtained using the World Health Organization Anthroplus  
133 software version 1.0.2 (WHO, Geneva, Switzerland). Children were then categorized by  
134 actual weight status as overweight ( $>+1$  SD), normal ( $< -2$  to  $+1$ ) and underweight ( $< -2$   
135 SD). These values at 19 years of age, at  $+1$  standard deviation (SD) correspond to the BMI  
136 values of  $25.4 \text{ kg/m}^2$  for boys and  $25.0 \text{ kg/m}^2$  for girls and is equivalent to the overweight  
137 cut-off for adults ( $> 25.0 \text{ kg/m}^2$ ), while the  $+2$  SD value ( $29.7 \text{ kg/m}^2$  for both sexes) compares  
138 closely with the cut-off for obesity ( $> 30.0 \text{ kg/m}^2$ )<sup>(19)</sup>.

139 To assess current body weight perception, children were asked to mark whether they  
140 thought their body weight or appearance was “too thin”, “a little thin”, “normal”, “a little  
141 fat”, or “very fat”. Response to a similar identical question about their child’s body weight or  
142 appearance with similar options was filled by parents in a questionnaire sent to their homes.  
143 For analysis, “very thin” and “a little thin” were combined as “too/little thin” and “a little fat”  
144 and ‘very fat’ were combined as “a little/too fat” and “normal” remained “normal”.

145 To assess perceptions on desired (ideal) body weight, children responded to the  
146 question “I want to be” with options “a lot fatter”, “slightly fatter”, “as I am at present”,  
147 “slightly thinner”, “much thinner”. The first 2 options were clubbed as “a lot/slightly fatter”,  
148 “as I am at present” as “same as at present” and the last 2 options clubbed as “slightly/much  
149 thinner. Parents responded to a similar question on “I want my child to be” with an identical

1  
2  
3 150 set of options. For analysis, clubbing of the options for parents desired body weight for their  
4  
5 151 child was also done in a similar manner.

6  
7 152 The Stunkard's silhouettes <sup>(20)</sup> were also used to assess body image perception in  
8  
9 153 children and this was also administered in the classroom. In order to make comparisons with  
10  
11 154 the body weight perception questions, the nine images were regrouped to reflect 3 categories  
12  
13 155 of weight status: underweight, normal and overweight. The agreement between the perceived  
14  
15 156 visual image and the body weight perception obtained by questions of current weight status,  
16  
17 157 evaluated using kappa statistics ranged from 0.23 to 0.53. A fair agreement between  
18  
19 158 underweight/fat and normal, and a moderate agreement between both the extremes of weight  
20  
21 159 (underweight versus overweight) was seen. There were no gender differences in agreement.  
22  
23 160 Parental perceptions of the body weight were assessed using structured questions, and since  
24  
25 161 this was available for both parent child; further analyses was done using only the questions.

26  
27 162 In addition, children were asked whether they had ever tried to lose weight. If they  
28  
29 163 replied in the affirmative (options: yes/no), the method used to try and lose weight was  
30  
31 164 recorded as "skipping meals", "stopped eating a certain kind of food", reduced quantity of  
32  
33 165 food eaten" and "exercise" as a multiple response. Weight loss methods recommended by  
34  
35 166 parents were similarly recorded.

36  
37 167 The present analysis is restricted to children on whom anthropometric measurements were  
38  
39 168 available and who responded to the question on weight loss and this corresponds to 1874  
40  
41 169 participants (871 boys, 1003 girls). The response rate (of a total of 1907 children) was 98.3%;  
42  
43 170 socio-demographic (age, gender, medium of instruction) characteristics between the  
44  
45 171 responders and non responders were comparable.

46  
47 172

### 48 173 **Statistical analysis:**

49  
50 174 Data are reported as number and percentages for all the categorical variables. For analysis,  
51  
52 175 socio-demographic variables of age of children were categorized as 10 and below and above  
53  
54 176 10 years of age (the adolescent period)<sup>(21)</sup>, language of instruction as Kannada and English  
55  
56 177 medium (a surrogate of socio-economic status), location as city and non-city (village and  
57  
58 178 small towns) and maternal and paternal education below 7<sup>th</sup> grade and above 7<sup>th</sup> grade.

1  
2  
3 179 Cross-tabulations were created of actual weight status of the child with the child's perception  
4 180 and parent's perception of their child's current body weight. Using this, the following eight  
5 181 groups were formed. As there were no children who were underweight but were perceived by  
6 182 either themselves or their parents to be overweight, this category was not considered.  
7  
8  
9

10 183 U/U – underweight by actual measurements/perceived by child/parent to be underweight

11 184 U/N- underweight by actual measurements/perceived by child/parent to be normal

12 185 N/U- normal by actual measurements/perceived by child/parent to be underweight

13 186 N/N- normal by actual measurements/perceived by child/parent to be normal

14 187 N/O- normal by actual measurements/perceived by child/parent to be overweight

15 188 O/N- overweight by actual measurements/perceived by child/parent to be normal

16 189 O/O- overweight by actual measurements/perceived by child/parent to be overweight

17 190 O/U- overweight by actual measurements/perceived by child/parent to be underweight

18 191 The referent group was the N/N group.

19 192 The association between the various socio-demographic factors as well with the above eight  
20 193 groups and attempt to lose weight was evaluated using the Chi-square test and the unadjusted  
21 194 odds ratio are reported. Association between attempt to lose weight and child's actual weight  
22 195 status, child's and parent's perception of child's weight status and the above mentioned eight  
23 196 groups were done using Chi square test stratified by age and gender. Binary logistic  
24 197 regression was performed to identify the factors associated with attempted weight loss  
25 198 adjusted for socio-demographic variables of age, gender, medium of instruction, parent's  
26 199 education and current actual body weight status, child's and parent's perceived and desired  
27 200 weight status of the child as model 1. In addition, a model (model 2) adjusted only for age,  
28 201 sex, medium of instruction, actual weight status and the child's weight perception was  
29 202 performed. Binary logistic regression was also performed to identify the factors associated  
30 203 with attempting to lose weight (Yes/No) based on the 8 groups (detailed above) created using  
31 204 the actual weight status of the child and child's or parent's perception of child's weight,  
32 205 adjusted for age, gender and medium of instruction. A level of significance (two-sided) less  
33 206 than 5% was considered statistically significant.

34 207 **RESULTS:**

35 208 Of the 1907 study children, 1874 responded to the question on whether they had ever tried to  
36 209 lose weight. Of these, 65.5% of children were normal weight, 25.0 % underweight and 9.5%  
37 210 overweight. Thirty two percent of children perceived themselves to be underweight; this was



1  
2  
3 211 7% more than the actual prevalence of underweight. Similarly, 15.4% perceived themselves  
4 212 to be overweight (5.9% higher than the actual prevalence). In contrast, parents tended to  
5  
6 213 under-estimate underweight (5% lower than the actual prevalence of under-weight).  
7

8  
9 214 A total of 35% of children had attempted to lose weight; this constituted 73% of overweight  
10 215 and obese, 35% of normal weight and 22% of underweight children. Sixty eight percent of  
11 216 those children who perceived themselves to be overweight, 32% of those who perceived  
12 217 themselves to be normal, and 23% of those who perceived themselves to be underweight  
13 218 attempted to lose weight. Similarly, 54 % of children whose parents perceived them to be  
14 219 overweight, 35% who perceived them to be normal, and 21% of those who perceived them to  
15 220 be underweight attempted to lose weight. Correlations between actual weight status of the  
16 221 child and the child's or parent's perception of the child's weight status, as well as the child's  
17 222 and parent's perceptions of desired (ideal) body weight ranged from 0.12 to 0.31 ( $p<0.01$ )  
18 223 (Supplementary table 1) indicating a low to moderate correlation between these variables.  
19

20  
21  
22  
23  
24  
25  
26 224 Among the socio-demographic factors (Table 1, Model 1), children in schools with Kannada  
27 225 as the medium of instruction were more likely to attempt to lose weight than those studying  
28 226 in schools with English as the medium of instruction (AOR= 1.57, 95% C.I: 1.11 to  
29 227 2.25). Underweight children were less likely to try to lose weight (AOR=0.71, 95% C.I: 0.51  
30 228 to 0.98), while overweight/obese children were more likely (AOR=4.38. 95% C.I: 2.64 to  
31 229 7.28) to try and lose weight compared to normal weight children. Based on the child's  
32 230 perception of their weight status, those who perceived themselves to be overweight were  
33 231 about 3 times more likely (AOR=2.91, 95% C.I: 1.95 to 4.34) to try to lose weight. Parental  
34 232 perception of weight status, however, did not have a significant impact on children  
35 233 attempting to lose weight. Children's (AOR=1.56, 95% C.I: 1.14 to 2.15) and parent's desire  
36 234 (AOR=1.79, 95% C.I: 1.25 to 2.58) for the child to be thinner also increased the likelihood of  
37 235 attempting to lose weight. Based on a simpler model (Model 2) the odds of attempting to  
38 236 lose weight was significantly higher among girls (1.37, CI: 1.11-1.70) compared to boys.  
39 237 Otherwise, the findings were similar to Model 1.  
40

41  
42  
43  
44  
45  
46  
47  
48  
49  
50 238 A stratified analysis based on age and gender (Supplementary table 2) was also done. While  
51 239 the groups were largely similar in terms of attempting to lose weight, significant differences  
52 240 were observed only among those children who were actually underweight as well as those  
53 241 who perceived themselves to be underweight. In these children, the prevalence of attempting  
54 242 to lose weight was significantly higher in older boys compared to older girls. Similarly, there  
55  
56  
57  
58  
59  
60

1  
2  
3 243 was a significantly higher prevalence of younger girls attempting to lose weight compared to  
4  
5 244 older girls, but not between younger and older boys.

6  
7 245 Figure 1 represents the odds of a child attempting to lose weight based on the child's actual  
8  
9 246 weight status in combination with the child's/parent's perception of weight status. After  
10  
11 247 adjusting for age, gender and medium of instruction, the odds of attempting to lose weight  
12  
13 248 (Figure 1, Supplementary table3) increased from 3.1 (95% CI: 2.2 to 4.4) for a normal weight  
14  
15 249 child who perceive themselves to be overweight/obese, 3.7(95% CI: 2.2 to 6.2) for an  
16  
17 250 overweight child who perceive themselves to be normal to 18.1 (95% CI: 8.8 to 36.9) for an  
18  
19 251 overweight child who perceive themselves to be overweight. A similar trend was observed  
20  
21 252 when parental perceptions were replaced with child's perception (Figure 1) with odds of  
22  
23 253 attempting to lose weight increasing from 1.7 (95% CI: 1.1 to 2.7) for normal weight child  
24  
25 254 perceived by a parent to be overweight, 4.7 (95% CI: 2.7 to 8.0) for an overweight child  
26  
27 255 perceived by a parent to be normal to 19.3(95% CI: 6.8 to 54.8) for an overweight child  
28  
29 256 perceived to be overweight by a parent. None of the underweight children were perceived by  
30  
31 257 themselves or by their parents to be overweight. Among children who were underweight but  
32  
33 258 perceived either by the child or parent to be underweight or normal, the odds of attempting to  
34  
35 259 lose weight was reduced by approximately 60% to 40% respectively in relation to children of  
36  
37 260 normal weight status perceived to be normal by both children and parents. The same analyses  
38  
39 261 were done using prevalence of attempting to lose weight based on actual weight status,  
40  
41 262 child's perception and parent's perception of child's weight status stratified by age and  
42  
43 263 gender (Figure 2a and 2b).

44  
45 264 The most commonly adopted practice to lose weight regardless of whether children were  
46  
47 265 underweight, overweight or normal was exercise (~46%), followed by reducing the quantity  
48  
49 266 of food intake, ceasing to eat certain kinds of foods and skipping meals (Figure 3).

## 45 267 **DISCUSSION:**

46  
47 268 In concurrence with the findings of our study, misperception of weight status among children  
48  
49 269 has been reported in other studies conducted in the United States of America, with  
50  
51 270 perceptions differing between various ethnic groups. Among African American adolescents,  
52  
53 271 one-third perceived their weight status inaccurately<sup>(7)</sup>. Racial or ethnic differences in weight  
54  
55 272 perception have been reported<sup>(5, 7, 8)</sup>, where Caucasians were more likely than African  
56  
57 273 Americans to perceive themselves as overweight<sup>(5, 7, 9)</sup>. However, this has not been a  
58  
59 274 universal finding, as for instance in multi-ethnic adolescents in the United Kingdom<sup>(14)</sup>.



1  
2  
3 275 Perceptions, however, were also associated with their decision to attempt weight loss,  
4  
5 276 notwithstanding their current weight status.  
6

7 277 In general, children who were actually overweight as well as those who were perceived by  
8  
9 278 themselves or by their parents to be overweight were highly likely to try to lose weight.. This  
10  
11 279 finding is similar to studies conducted in other countries <sup>(7, 8, 22)</sup>. Unless individuals or their  
12  
13 280 families perceive their weight status correctly, their acceptance of programmes designed to  
14  
15 281 encourage healthy weight may be low <sup>(17)</sup>.  
16

17 282 The child's or parent's desire for the child to be thinner was also associated with their  
18  
19 283 decision to attempt to lose weight. This desire was highest among those who perceived  
20  
21 284 themselves to be overweight, although about one-third of those who perceived themselves to  
22  
23 285 be normal weight and about one-fifth of those who perceived themselves to be underweight  
24  
25 286 also attempted to lose weight. In contrast, among children who were underweight and those  
26  
27 287 of normal weight, 32% and 23% desired to gain weight respectively. This clearly indicates  
28  
29 288 that in a country where both underweight and overweight co-exist, care must be taken in  
30  
31 289 developing programmes at a community level such that those who require to put on weight  
32  
33 290 and those who need to lose weight are considered, as for example in the school feeding  
34  
35 291 programmes.  
36

37 292  
38 293 The fact that there were reported weight loss attempts even in the underweight group suggests  
39  
40 294 that factors other than weight status and weight perception are operative. This is corroborated  
41  
42 295 by the higher odds of children from Kannada medium schools, who belong to a relatively  
43  
44 296 lower socio-economic status compared to children from English medium schools (higher  
45  
46 297 SES) trying to lose weight. Thus socio-cultural factors may be associated with their decision  
47  
48 298 to lose weight. This could be linked to the continuous exposure to images and unrealistic  
49  
50 299 body shapes that encourage weight loss regardless of body weight<sup>(8)</sup>. These factors must be  
51  
52 300 further explored so that suitable programmes that encourage overweight children but not  
53  
54 301 underweight or normal children to lose weight are planned.  
55

56 302 Included in our sample were children as young as 8 years of age. However, body  
57  
58 303 dissatisfaction with increasing weight status was established even by the age of 5 in both  
59  
60 304 boys and girls of South Asian origin in UK<sup>(3)</sup>. Irrespective of whether they were below or  
305  
306 305 above 10 years of age or whether they were boys or girls, children attempted to lose weight.  
In our study sample, there were no gender differences in weight loss attempts. This is

1  
2  
3 307 contrary to the findings elsewhere, as for instance, the NHANES study <sup>(16)</sup>, which indicated  
4 308 that girls were about 2 ½ times more likely to attempt to lose weight. The absence of gender  
5  
6 309 differences in our study may, in part, be due to the relatively low prevalence of overweight or  
7  
8 310 obesity.

9  
10 311 It is encouraging that 46 % children indicated exercise their preferred choice of weight loss.  
11 312 Differences in the methods used to lose weight between overweight, normal and underweight  
12 313 children were not apparent unlike other studies where unhealthier weight loss methods like  
13 314 skipping meals are reported more in overweight or obese children compared to normal weight  
14 315 children <sup>(23)</sup>. However, an effect of social desirability cannot be discounted, given that  
15  
16 316 exercise as a healthy lifestyle choice is promoted early in the school curriculum

17  
18 317 Body image must be taken into account when designing programmes to improve both body  
19 318 image and reduce unhealthy behaviours like unhealthy eating and reduced or excessive  
20 319 exercise <sup>(1)</sup>. Since public health programmes are generally targeted towards all, a general  
21 320 programme that caters to all children irrespective of their weight status is required.

22  
23 321 **Strengths and limitations:** This is the first study to report perceptions of body weight in  
24 322 India in relation to weight loss attempts. A major strength of this study is that measured  
25 323 heights and weights rather than self-reported, were used and the study sample encompassed  
26 324 children of diverse socio-economic strata, from rural and urban areas and of a large body  
27 325 weight range. However, with the cross-sectional study design used in this study, the changes  
28 326 in perception as the children grow cannot be accounted for. Longitudinal evaluation of these  
29 327 children will allow us to establish causal links between weight perception and weight loss  
30 328 behaviours. Both the fact that the study was cross-sectional in nature, as well as the design of  
31 329 the questionnaire were limitations as information regarding the frequency, duration, and  
32 330 intensity of weight loss efforts, or time-sequence of events, that is, the time (recent/current or  
33 331 past) at which such behaviours occurred could not be obtained. Data on the reliability and  
34 332 validity of the questionnaire are not available for this population. With the question asked on  
35 333 attempt to lose weight being dichotomous, there is a possibility that a child who is currently  
36 334 normal weight may report weight loss behaviours because they were overweight in the past.  
37 335 The small numbers of children in each category in the analysis stratified by actual and  
38 336 perceived weight status necessitates further exploration with larger numbers of children in  
39 337 each category. A further limitation is that we have not collected data on attempt to gain  
40 338 weight.

339

340 Overall, perception of weight status was associated with the decision of children to lose  
341 weight. This needs to be further explored as a longitudinal study to establish causal links.  
342 However, regardless of weight status, many children did resort to weight loss. Public health  
343 campaigns should emphasize healthy weight management rather than weight loss.

344 *Acknowledgements:* The authors thank Dr. Roopashree who helped in acquisition and entry  
345 of part of the data.

346 *Contributors:* MP, SS and MV were responsible for the concept and design of the study. SS  
347 drafted and the manuscript. MP acquired the data. Sumithra Selvam (SRS) performed the  
348 statistical analysis and interpreted the data. MV conceived the study and interpreted the data.  
349 All authors revised the manuscript critically for important intellectual content. SS is the  
350 guarantor.

351 *Funding:* This research received no specific grant from any funding agency in the public,  
352 commercial or not-for-profit sectors.

353 *Competing interests:* All authors have completed the Unified Competing Interest form at  
354 [www.icmje.org/coi\\_disclosure.pdf](http://www.icmje.org/coi_disclosure.pdf) (available on request from the corresponding author) and  
355 declare no support from any organisation for the submitted work; no financial relationships  
356 with any organisations that might have an interest in the submitted work in the previous 3  
357 years/ no other relationships or activities that could appear to have influenced the submitted  
358 work.

359 The Corresponding Author has the right to grant on behalf of all authors and does grant on  
360 behalf of all authors, an exclusive licence (or non exclusive for government employees) on a  
361 worldwide basis to the BMJ Publishing Group Ltd and its Licensees to permit this article (if  
362 accepted) to be published in BMJ editions and any other BMJ PGL products and sub-licences  
363 to exploit all subsidiary rights, as set out in your licence (  
364 <http://resources.bmj.com/bmj/authors/checklists-forms/licence-for-publication>)

365 *Data Sharing:* Raw data are available from the statistician, Sumithra Selvam on request at  
366 [sumithrars@sjri.res.in](mailto:sumithrars@sjri.res.in).

367

368

369 **References:**

- 370 1. Grogan S. Body image and health: contemporary perspectives. *J Health Psychol*  
371 2006;11(4):523-30.
- 372 2. Cortese S, Falissard B, Pigaiani Y, et al. The relationship between body mass index and body  
373 size dissatisfaction in young adolescents: spline function analysis. *J Am Diet Assoc*  
374 2010;110(7):1098-102.
- 375 3. Pallan MJ, Hiam LC, Duda JL, et al. Body image, body dissatisfaction and weight status in South  
376 Asian children: a cross-sectional study. *BMC Public Health* 2011;11:21.
- 377 4. Jain V, Singhal A. Catch up growth in low birth weight infants: Striking a healthy balance. *Rev*  
378 *Endocr Metab Disord* 2012;13:141-147.
- 379 5. Martin MA, May AL, Frisco ML. Equal weights but different weight perceptions among US  
380 adolescents. *J Health Psychol* 2010;15(4):493-504.
- 381 6. Swami V, Frederick DA, Aavik T, et al. The attractive female body weight and female body  
382 dissatisfaction in 26 countries across 10 world regions: results of the international body  
383 project I. *Pers Soc Psychol Bull* 2010;36(3):309-25.
- 384 7. Wang Y, Liang H, Chen X. Measured body mass index, body weight perception, dissatisfaction  
385 and control practices in urban, low-income African American adolescents. *BMC Public Health*  
386 2009;9:183.
- 387 8. Duncan JS, Duncan EK, Schofield G. Associations between weight perceptions, weight control  
388 and body fatness in a multiethnic sample of adolescent girls. *Public Health Nutr* 2010;14(1):93-  
389 100.
- 390 9. Neff LJ, Sargent RG, McKeown RE, et al. Black-white differences in body size perceptions and  
391 weight management practices among adolescent females. *J Adolesc Health* 1997;20(6):459-  
392 65.
- 393 10. Viner RM, Haines MM, Taylor SJ, et al. Body mass, weight control behaviours, weight  
394 perception and emotional well being in a multiethnic sample of early adolescents. *Int J Obes*  
395 (Lond) 2006;30(10):1514-21.
- 396 11. Ceballos N, Czyzewska M. Body image in Hispanic/Latino vs. European American adolescents:  
397 implications for treatment and prevention of obesity in underserved populations. *J Health*  
398 *Care Poor Underserved* 2010;21(3):823-38.
- 399 12. Ayala GX, Mickens L, Galindo P, et al. Acculturation and body image perception among Latino  
400 youth. *Ethn Health* 2007;12(1):21-41.
- 401 13. Cachelin FM, Rebeck RM, Chung GH, et al. Does ethnicity influence body-size preference? A  
402 comparison of body image and body size. *Obes Res* 2002;10(3):158-166.
- 403 14. Haff HR. Racial/Ethnic differences in weight perceptions and weight control behaviors among  
404 adolescent females. *Youth & Society* 2009;41(2):278-301.
- 405 15. Ojala K, Vereecken C, Valimaa R, et al. Attempts to lose weight among overweight and non-  
406 overweight adolescents: a cross-national survey. *Int J Behav Nutr Phys Act* 2007;4:50.
- 407 16. Yan AF, Zhang G, Wang MQ, et al. Weight perception and weight control practice in a  
408 multiethnic sample of US adolescents. *South Med J* 2009;102(4):354-60.
- 409 17. Edwards NM, Pettingell S, Borowsky IW. Where perception meets reality: self-perception of  
410 weight in overweight adolescents. *Pediatrics* 2010;125(3):e452-8.
- 411 18. Pauline M, Selvam S, Swaminathan S, et al. Body weight perception is associated with socio-  
412 economic status and current body weight in selected urban and rural South Indian school-  
413 going children. *Public Health Nutr* 2012:1-9.
- 414 19. de Onis M, Onyango AW, Borghi E, et al. Development of a WHO growth reference for school-  
415 aged children and adolescents. *Bull World Health Organ* 2007;85(9):660-7.
- 416 20. Stunkard AJ, Sorensen T, Schulsinger F. Use of the Danish Adoption Register for the study of  
417 obesity and thinness. In: Kety SS RL, Sidman RL, Matthyse SW, editor. *Genetics of*  
418 *Neurological and Psychiatric Disorders.*of Neurological and Psychiatric Disorders. New York:  
419 Raven Press; 1983. p. 115-120.

1  
2  
3  
4  
5  
6  
7  
8  
9  
10  
11  
12  
13  
14  
15  
16  
17  
18  
19  
20  
21  
22  
23  
24  
25  
26  
27  
28  
29  
30  
31  
32  
33  
34  
35  
36  
37  
38  
39  
40  
41  
42  
43  
44  
45  
46  
47  
48  
49  
50  
51  
52  
53  
54  
55  
56  
57  
58  
59  
60

420 21. World Health Organization. Nutrition in adolescence. Issues and Challenges for the health  
421 sector. Discussion paper. Geneva: WHO; 2005.  
422 22. Alwan H, Viswanathan B, Paccaud F, et al. Is Accurate Perception of Body Image Associated  
423 with Appropriate Weight-Control Behavior among Adolescents of the Seychelles. *J Obes*  
424 2011;2011:817242.  
425 23. Boutelle K, Neumark-Sztainer D, Story M, et al. Weight control behaviors among obese,  
426 overweight, and nonoverweight adolescents. *J Pediatr Psychol* 2002;27(6):531-40.  
427  
428

For peer review only

Table 1. Socio-economic and anthropometric associations of weight loss behaviour

|                                | Attempted weight loss |           | Unadjusted OR<br>95% C.I. | P value*            | Adjusted † OR<br>Model 1<br>95% C.I. | P value‡            | Adjusted ¶ OR<br>Model 2<br>95% C.I. | P value‡            |        |
|--------------------------------|-----------------------|-----------|---------------------------|---------------------|--------------------------------------|---------------------|--------------------------------------|---------------------|--------|
|                                | Yes                   | No        |                           |                     |                                      |                     |                                      |                     |        |
| Gender                         |                       |           |                           |                     |                                      |                     |                                      |                     |        |
|                                | Girls                 | 387 (39%) | 616 (61%)                 | 1.41<br>1.16 – 1.72 | <0.001                               | 1.16<br>0.89 – 1.51 | 0.27                                 | 1.37<br>1.11 – 1.70 | 0.01   |
|                                | Boys                  | 268 (31%) | 603 (69%)                 | 1                   |                                      | 1                   |                                      | 1                   |        |
| Age category (years)           |                       |           |                           |                     |                                      |                     |                                      |                     |        |
|                                | <=10                  | 245 (34%) | 469 (66%)                 | 0.96<br>0.78 – 1.17 | 0.65                                 | 1.04<br>0.79 – 1.36 | 0.76                                 | 1.03<br>0.83 – 1.28 | 0.79   |
|                                | >10                   | 410 (35%) | 750 (65%)                 | 1                   |                                      | 1                   |                                      | 1                   |        |
| Location                       |                       |           |                           |                     |                                      |                     |                                      |                     |        |
|                                | City                  | 408 (33%) | 812 (67%)                 | 0.83<br>0.68 – 1.01 | 0.06                                 | 1.03<br>0.78 – 1.36 | 0.81                                 | -                   | -      |
|                                | Non City              | 247 (38%) | 407 (62%)                 | 1                   |                                      | 1                   |                                      | 1                   |        |
| Education of mother (Standard) |                       |           |                           |                     |                                      |                     |                                      |                     |        |
|                                | Up to 7 <sup>th</sup> | 146 (34%) | 278 (66%)                 | 0.95<br>0.75 – 1.22 | 0.69                                 | 0.81<br>0.58 – 1.14 | 0.22                                 | -                   | -      |
|                                | > 7 <sup>th</sup>     | 400 (36%) | 727 (65%)                 | 1                   |                                      | 1                   |                                      | 1                   |        |
| Education of father (Standard) |                       |           |                           |                     |                                      |                     |                                      |                     |        |
|                                | Up to 7 <sup>th</sup> | 161 (39%) | 256 (61%)                 | 1.21<br>0.95 – 1.53 | 0.10                                 | 1.24<br>0.87-1.78   | 0.22                                 | -                   | -      |
|                                | > 7 <sup>th</sup>     | 437 (34%) | 838 (66%)                 | 1                   |                                      | 1                   |                                      | 1                   |        |
| Medium of instruction          |                       |           |                           |                     |                                      |                     |                                      |                     |        |
|                                | Kannada               | 198 (39%) | 308 (61%)                 | 1.28<br>1.03- 1.59  | 0.02                                 | 1.57<br>1.11 – 2.25 | 0.01                                 | 1.52<br>1.20 – 1.92 | <0.001 |
|                                | English <sup>1</sup>  | 457(33%)  | 911 (67%)                 | 1                   |                                      | 1                   |                                      | 1                   |        |

|                                           |           |           |             |        |             |        |             |        |  |
|-------------------------------------------|-----------|-----------|-------------|--------|-------------|--------|-------------|--------|--|
| Actual weight status                      |           |           |             |        |             |        |             |        |  |
| Underweight                               | 98 (22%)  | 352 (78%) | 0.52        | <0.001 | 0.71        | 0.04   | 0.66        |        |  |
|                                           |           |           | 0.40 – 0.67 |        | 0.51 – 0.98 |        | 0.50 – 0.86 | 0.002  |  |
| Overweight                                | 125 (73%) | 47 (27%)  | 4.96        | <0.001 | 4.38        | <0.001 | 3.86        |        |  |
|                                           |           |           | 3.43 – 7.20 |        | 2.64 – 7.28 |        | 2.63 – 5.64 | <0.001 |  |
| Normal                                    | 412 (35%) | 769 (65%) | 1           |        | 1           |        |             |        |  |
| Child's perception of body image          |           |           |             |        |             |        |             |        |  |
| Too /A little Thin                        | 133 (23%) | 457 (77%) | 0.61        | <0.001 | 0.67        | 0.01   | 0.64        | <0.001 |  |
|                                           |           |           | 0.48 – 0.77 |        | 0.49 – 0.93 |        | 0.49 – 0.82 |        |  |
| A little /Too fat                         | 195 (68%) | 91 (32%)  | 4.48        | <0.001 | 2.91        | <0.001 | 3.48        | <0.001 |  |
|                                           |           |           | 3.35 – 6.00 |        | 1.95 – 4.34 |        | 2.57 – 4.69 |        |  |
| Normal                                    | 318 (32%) | 665 (68%) | 1           |        | 1           |        |             |        |  |
| Child's desire to be                      |           |           |             |        |             |        |             |        |  |
| A lot /Slightly fatter                    | 114 (25%) | 347 (75%) | 0.76        | 0.03   | 0.84        | 0.35   |             |        |  |
|                                           |           |           | 0.58 – 0.98 |        | 0.59 – 1.20 |        |             |        |  |
| Slightly/Much thinner                     | 260(52%)  | 237 (48%) | 2.53        | <0.001 | 1.56        | 0.006  | -           | -      |  |
|                                           |           |           | 2.00 – 3.19 |        | 1.14 – 2.15 |        |             |        |  |
| Same as at present                        | 272 (30%) | 627 (70%) | 1           |        | 1           |        |             |        |  |
| Parent's perception of child's body image |           |           |             |        |             |        |             |        |  |
| Too /A little Thin                        | 66 (22%)  | 241 (79%) | 0.52        | <0.001 | 0.76        | 0.15   |             |        |  |
|                                           |           |           | 0.38 – 0.71 |        | 0.52 – 1.12 |        | -           | -      |  |
| A little /Too fat                         | 95 (54%)  | 82 (46%)  | 2.20        | <0.001 | 0.86        |        |             |        |  |
|                                           |           |           | 1.58 – 3.08 |        | 0.51 – 1.37 | 0.51   |             |        |  |
| Normal                                    | 364 (35%) | 690 (66%) | 1           |        | 1           |        |             |        |  |
| Parent's desire for child to be           |           |           |             |        |             |        |             |        |  |
| A lot /Slightly fatter                    | 87 (21%)  | 331 (79%) | 0.54        | <0.001 | 0.75        | 0.11   |             |        |  |
|                                           |           |           | 0.41- 0.72  |        | 0.52 – 1.07 |        | -           | -      |  |
| Slightly /Much thinner                    | 170 (56%) | 134 (44%) | 2.61        | <0.001 | 1.79        |        |             |        |  |
|                                           |           |           | 1.98 – 3.46 |        | 1.25 – 2.58 | 0.002  |             |        |  |
| Same as at present                        | 263 (33%) | 542 (67%) | 1           |        | 1           |        |             |        |  |

Results are reported as Number (percentages); OR – Odds Ratio; 95% C.I. – 95% Confidence Interval

\*Fisher's Exact test or Chi square test

1  
2  
3  
4  
5 † Adjusted for actual BMI status, child's and parents perception of body weight and socio-demographic factors

6 ‡ Obtained by fitting binary logistic regression model. Model 1: Adjusted for socio-demographic variables and actual and perceived weight

7 ¶ Obtained by fitting binary logistic regression model. Model 2: Adjusted for age, gender, medium of instruction, actual weight status and child's perception of  
8 body weight.  
9

10  
11  
12  
13  
14  
15  
16  
17  
18  
19  
20  
21  
22  
23  
24  
25  
26  
27  
28  
29  
30  
31  
32  
33  
34  
35  
36  
37  
38  
39  
40  
41  
42  
43  
44  
45  
46  
47  
48  
49

For peer review only



1  
2  
3  
4  
5  
6  
7  
8 **Figure Legends:**  
9

10 **Figure 1: Odds ratio of having tried to lose body weight in children classified by current**  
11 **weight status and perception of body weight.** ■ Comparison of child's actual weight

12 status with child's perception of weight status □ Comparison of child's actual weight  
13 status with parental perception of weight status. U/U: underweight by actual  
14 measurements/child's or parent's perception of being underweight, U/N: underweight by  
15 actual measurements/child's or parent's perception of being normal, N/U- normal by actual  
16 measurements/perceived by child/parent to be underweight, N/N: normal by actual  
17 measurements/child's or parent's perception of being normal, N/O: normal by actual  
18 measurements/child's or parent's perception of being overweight, O/N: overweight by actual  
19 measurements/child's or parent's perception of being normal, O/O: overweight by actual  
20 measurements/child's or parent's perception of being overweight, O/U: overweight by actual  
21 measurements/child's or parent's perception of being underweight.  
22  
23  
24  
25  
26  
27  
28  
29  
30  
31  
32

33  
34 **Figure 2a and 2b: Prevalence of attempting to lose weight by gender and age category**  
35 **based on actual weight status and children and parent's perception of child's body**  
36 **weight. UW – Underweight, OW – Overweight**  
37  
38  
39

40 **Figure 3: Actual weight status and weight loss practices of children**

41  
42 ■ Exercise ■ Reduced quantity of food eaten ■ Stopped eating certain kind of foods  
43 □ Skipping meals  
44  
45  
46  
47  
48  
49  
50  
51  
52  
53  
54  
55  
56  
57  
58  
59  
60

1  
2  
3 | **ASSOCIATIONS** BETWEEN BODY WEIGHT PERCEPTIONS AND WEIGHT  
4 | CONTROL BEHAVIORS IN SOUTH INDIAN CHILDREN– A CROSS-SECTIONAL  
5 |  
6 | STUDY  
7 |

8 | Sumathi Swaminathan *Assistant Professor Division of Nutrition*<sup>1</sup>, Sumithra Selvam *Lecturer*  
9 | *Division of Biostatistics and Epidemiology*<sup>1</sup>, Maria Pauline *Assistant Professor, Department*  
10 | *of Physiology*<sup>2</sup>, Mario Vaz *Professor Department of Physiology and Division of Humanities*  
11 | *and Health*<sup>1,2</sup>  
12 |

13 | <sup>1</sup>St. John's Research Institute, St John's National Academy of Health Sciences, Koramangala,  
14 | Bangalore- 560 034, Karnataka, India; <sup>2</sup> St.John's Medical College & Hospital, St. John's  
15 | National Academy of Health Sciences, Koramangala, Bangalore- 560 034, Karnataka, India  
16 |  
17 |

18 |  
19 |  
20 |  
21 |  
22 |  
23 |  
24 | Correspondence to: Sumathi Swaminathan  
25 | E-mail: [sumathi@sjri.res.in](mailto:sumathi@sjri.res.in)  
26 | St John's Research Institute,  
27 | St John's national Academy of Health Sciences,  
28 | Koramangala, Bangalore: 560 034  
29 | Karnataka, India  
30 |  
31 |

32 |  
33 |  
34 |  
35 |  
36 |  
37 |  
38 |  
39 | Short title: Body weight perception influences weight loss in South Indian children  
40 |  
41 |  
42 |  
43 |  
44 |  
45 |  
46 |  
47 |  
48 |  
49 |  
50 |  
51 |  
52 |  
53 |  
54 |  
55 |  
56 |  
57 |  
58 |  
59 |  
60 |

25

**Abstract:**

**Objective:** To examine the patterns of weight loss behaviour, and the association between weight loss attempts with actual weight status, and children's and parental perceptions of weight status.

**Design:** Cross sectional study

**Setting:** Karnataka, South India

**Participants:** 1874 girls and boys aged 8 to 14 years from 7 schools in Karnataka, South India

**Main outcome measures:** The association between weight loss attempts and socio-demographic factors, weight status and the child or parent's perception of weight status.

**Results:** Approximately 73% of overweight and obese, 35% of normal weight and 22% of underweight children attempted to lose weight. Children of lower socio-economic groups studying in schools in the local vernacular and overweight/obese children were more likely to attempt to lose weight (Adjusted odds ratio or AOR=1.57, 95% CI: 1.11 to 2.25; AOR= 4.38, 95% CI: 2.64 to 7.28, respectively). Perception of weight status was [important in influencing associated with](#) weight loss attempts. Thus, children who were normal weight but perceived themselves to be overweight / obese were three times more likely to attempt weight loss compared with those who accurately perceived themselves as normal weight, while the odds of attempting weight loss were the highest for those who were overweight and perceived themselves to be so (AOR ~ 18).

**Conclusions:** Children are likely to attempt weight loss in India irrespective of their weight status, age and gender. Children who were actually overweight as well as those who were perceived by themselves or by their parents to be overweight or obese were highly likely to try to lose weight. It is necessary to understand body weight perceptions in communities with a dual burden of overweight and under-nutrition, if intervention programmes for either are to be successful.

52

53

#### ARTICLE FOCUS:

- To explore weight loss behaviour patterns and association between weight loss attempts with socio-demographic factors, actual as well as children's and parental perceptions of child's weight status.

#### KEY MESSAGES

- In India, where both overweight and underweight in children co-exist, there are no data on the associations of body weight perceptions of children in relation to weight loss attempts. It is essential to understand this association in order to tailor suitable intervention programmes that can work in communities with concurrent under- and over-nutrition.
- Weight loss is attempted by children irrespective of weight status, age and gender. However, there are higher odds of attempting to lose weight among those who perceive themselves to be overweight, although their weight status may be normal.

#### STRENGTHS AND LIMITATIONS

- This is the first study to report perceptions of body weight in India in relation to weight loss attempts.
- The cross-sectional study design used in this study, allows only associations to be assessed.

54

55

56

## 57 INTRODUCTION:

58 Body image is a psycho-social dimension of body size that encompasses both perceptual and  
59 attitudinal factors <sup>(1)</sup> and has been associated with eating disorders <sup>(1, 2)</sup>. In recent years, its  
60 association with overweight and obesity has been described <sup>(3)</sup>. It is recognised that  
61 individuals make decisions on lifestyle behaviours based on body weight perceptions (a  
62 dimension of body image) <sup>(1, 4)</sup>. In India, there is a large burden of under-nutrition alongside  
63 increasing overweight and obesity <sup>(4)</sup>. For public health and clinical programmes to be more  
64 effective, body image of undernourished and overweight children should be understood in the  
65 context of the influence of culture on body weight perceptions and on weight management  
66 behaviours.

67 A large number of studies have indicated that children and adolescents misperceive their  
68 body weight status <sup>(5-10)</sup>. Interventions that address socio-cultural attitudes towards  
69 appearance should ideally reduce body image dissatisfaction as well as overweight and  
70 obesity since studies have indicated a relationship between body image, unhealthy eating  
71 practices and obesity <sup>(11, 12)</sup>. Perceptions of body weight are, in part, influenced by external  
72 factors including cultural norms and social preferences as it has been observed that Asian  
73 women have less body dissatisfaction than other ethnic groups <sup>(13)</sup>. In India, it is often  
74 believed that an overweight person is wealthier and happier and reflects social mobility to a  
75 higher status compared to an underweight person, although there are no studies to corroborate  
76 this. The disconnect between actual weight and perception of body size could stem from the  
77 extent to which individuals identify with the majority cultural standards of beauty <sup>(14)</sup>. There  
78 are also reports that individuals in less socio-economically developed societies positively  
79 evaluate overweight and obese figures <sup>(6)</sup>. Evidence also suggests associations of actual body  
80 weight, body weight perceptions and weight dissatisfaction with weight control practices;  
81 overweight children are more likely to try to lose weight compared to non-overweight  
82 children <sup>(7, 15)</sup>. Analysis of data from the National Health and Nutrition Examination Survey  
83 (NHANES) <sup>(16)</sup> and the Youth Risk Behaviour Surveillance Survey (YRBSS) <sup>(14, 17)</sup> indicate  
84 that those overweight children who perceived their weight status correctly were more likely  
85 to exercise or eat less for weight control. Results from an analysis from Europe, Israel and  
86 North America as part of the Health Behaviour in School aged Children (HBSC) 2001/2002  
87 survey indicated that weight and age were significant factors influencing associated with  
88 currents attempts to lose weight <sup>(15)</sup>.

1  
2  
3 89 For healthy weight management it is necessary for a person to perceive his or her weight  
4 90 status accurately as well as be aware of healthy methods to lose or gain weight. Most  
5 91 literature on body weight perceptions and weight control behaviours are related to studies  
6 92 done in developed countries<sup>(5, 7, 14, 16)</sup> with a few on ethnic minorities, including South Asians  
7 93<sup>(3, 10)</sup>. The present analysis aims to examine the associations between the actual weight  
8 94 status, body weight perceptions of both children and their parents, and body weight  
9 95 satisfaction with weight loss intentions. The study sample included a wide range of body  
10 96 weights to reflect the dual burden of under-nutrition and overweight/obesity that India  
11 97 currently faces.

## 18 98 **METHODS:**

### 20 99 **Study population:**

21 100 A total of 2083 school children aged 8 to 14 years from 7 schools of varying socio-  
22 101 economic status located in rural areas, towns in Karnataka and urban Bangalore in South  
23 102 India, were contacted at baseline out of which 1907 (91.6%) children participated in a  
24 103 longitudinal study on body image perceptions and growth indices of school children, details  
25 104 of which are published earlier<sup>(18)</sup>. Convenience sampling of 7 city and non-city (rural and  
26 105 small towns) co-educational, non-residential schools was employed, such that children  
27 106 representing various socio-economic statuses (based on school fees linked to medium of  
28 107 instruction) were recruited. Of these schools, 2 were located in villages, 3 in small towns and  
29 108 2 in Bangalore city. The schools in which Kannada, the regional state language, was the  
30 109 language of instruction, received government support and had annual tuition fees of Rs.250 to  
31 110 500 whereas English medium schools did not receive government support and had annual  
32 111 tuition fees of above Rs.6000. Hence the medium of instruction in schools was used as an  
33 112 indicator of socio-economic status (SES). Three schools (1 each in a village, small town and  
34 113 city) had Kannada as the medium of instruction while four schools (1 in a village, 2 in small  
35 114 towns and 1 in the city) had English as the medium of instruction.

36 115 The sample recruited had adequate power (above 80 %) to identify the significant socio-  
37 116 demographic predictors for perception of body image in the present study and to estimate a  
38 117 difference of at least 10% over-estimation or under-estimation of body weight at 5% level of  
39 118 significance. Ethical approval was obtained from the Institutional Ethical Review Board.

1  
2  
3 119 Principals of schools were contacted for permission to conduct the study in their schools.  
4 120 Written parental consent and assent from the child was also obtained. A questionnaire to  
5 assess body image perception was administered by an investigator (MP) to all the consenting  
6 students in a class by reading aloud the questions in either English or Kannada (the local  
7 language). Responses were marked on the questionnaire by each child. A short questionnaire  
8 in English or the local language to be filled by one of the parents was sent home after the  
9 children completed their questionnaires. Children whose parents were illiterate (6.7%  
10 mothers, 5.9% fathers), elicited the answers from either of their parents and filled up the  
11 questionnaire.  
12  
13  
14  
15  
16  
17

### 128 **Measurements:**

129 Height was measured using a fibreglass tape without foot wear to 0.2 cm. Weight was  
130 measured in school uniforms but without shoes using a calibrated digital scale (Home Health,  
131 Model 8604, Dr. Morepen Lab, Hong Kong) to the nearest 100 gm. All measurements were  
132 made using a standardized protocol. Body mass index (BMI) was computed and the BMI-  
133 for-age Z score values were obtained using the World Health Organization Anthroplus  
134 software version 1.0.2 (WHO, Geneva, Switzerland). Children were then categorized by  
135 actual weight status as overweight ( $>+1$  SD), normal ( $< -2$  to  $+1$ ) and underweight ( $< -2$   
136 SD). These values at 19 years of age, at  $+1$  standard deviation (SD) correspond to the BMI  
137 values of  $25.4 \text{ kg/m}^2$  for boys and  $25.0 \text{ kg/m}^2$  for girls and is equivalent to the overweight  
138 cut-off for adults ( $> 25.0 \text{ kg/m}^2$ ), while the  $+2$  SD value ( $29.7 \text{ kg/m}^2$  for both sexes) compares  
139 closely with the cut-off for obesity ( $> 30.0 \text{ kg/m}^2$ )<sup>(19)</sup>.

140 To assess current body weight perception, children were asked to mark whether they  
141 thought their body weight or appearance was “too thin”, “a little thin”, “normal”, “a little  
142 fat”, or “very fat”. Response to a similar identical question about their child’s body weight or  
143 appearance with similar options was filled by parents in a questionnaire sent to their homes.  
144 For analysis, “very thin” and “a little thin” were combined as “too/little thin” and “a little fat”  
145 and ‘very fat’ were combined as “a little/too fat” and “normal” remained “normal”.

146 To assess perceptions on desired (ideal) body weight, children responded to the  
147 question “I want to be” with options “a lot fatter”, “slightly fatter”, “as I am at present”,  
148 “slightly thinner”, “much thinner”. The first 2 options were clubbed as “a lot/slightly fatter”,  
149 “as I am at present” as “same as at present” and the last 2 options clubbed as “slightly/much  
150 thinner. Parents responded to a similar question on “I want my child to be” with an identical



1  
2  
3 151 set of options. For analysis, clubbing of the options for parents desired body weight for their  
4  
5 152 child was also done in a similar manner.

6  
7 153 The Stunkard's silhouettes <sup>(20)</sup> were also used to assess body image perception in  
8  
9 154 children and this was also administered in the classroom. In order to make comparisons with  
10  
11 155 the body weight perception questions, the nine images were regrouped to reflect ~~the~~ 3  
12  
13 156 categories of weight status: ~~as~~ underweight, normal and overweight. The agreement between  
14  
15 157 the perceived visual image and the body weight perception obtained by questions of current  
16  
17 158 weight status, evaluated using kappa statistics ranged from 0.23 to 0.53. A fair agreement  
18  
19 159 between underweight/fat and normal, and a moderate agreement between both the extremes  
20  
21 160 of weight (underweight versus overweight) was seen. There were no gender differences in  
22  
23 161 agreement. Parental perceptions of the body weight were assessed using structured questions  
24  
25 162 ~~only~~, and since this was available ~~both for both the parent and the child~~; further analyses ~~were~~  
26  
27 163 ~~was done using only the questions only.~~

28  
29 164 In addition, children were asked whether they had ever tried to lose weight. If they  
30  
31 165 replied in the affirmative (options: yes/no), the method used to try and lose weight was  
32  
33 166 recorded as "skipping meals", "stopped eating a certain kind of food", reduced quantity of  
34  
35 167 food eaten" and "exercise" as a multiple response. Weight loss methods recommended by  
36  
37 168 parents were similarly recorded.

38  
39 169 The present analysis is restricted to children on whom anthropometric measurements were  
40  
41 170 available and who responded to the question on weight loss and this corresponds to 1874  
42  
43 171 participants (871 boys, 1003 girls). The response rate (of a total of 1907 children) was 98.3%;  
44  
45 172 socio-demographic (age, gender, medium of instruction) characteristics between the  
46  
47 173 responders and non responders were comparable.

48  
49 174

#### 175 **Statistical analysis:**

50  
51 176 Data are reported as number and percentages for all the categorical variables. For analysis,  
52  
53 177 socio-demographic variables of age of children were categorized as 10 and below and above  
54  
55 178 10 years of age (the adolescent period)<sup>(21)</sup>, language of instruction as Kannada and English  
56  
57 179 medium (a surrogate of socio-economic status), location as city and non-city (village and  
58  
59 180 small towns) and maternal and paternal education below 7<sup>th</sup> grade and above 7<sup>th</sup> grade.



1  
2  
3 181 Cross-tabulations were created of actual weight status of the child with the child's perception  
4 182 and parent's perception of their child's current body weight. Using this, the following eight  
5 183 groups were formed. As there were no children who were underweight but were perceived  
6 184 ~~either~~ by either themselves or their parents to be overweight, this category was not  
7  
8  
9 185 considered.

10  
11  
12 186 U/U – underweight by actual measurements/perceived by child/parent to be underweight

13  
14 187 U/N- underweight by actual measurements/perceived by child/parent to be normal

15  
16 188 N/U- normal by actual measurements/perceived by child/parent to be underweight

17  
18 189 N/N- normal by actual measurements/perceived by child/parent to be normal

19  
20 190 N/O- normal by actual measurements/perceived by child/parent to be overweight

21  
22 191 O/N- overweight by actual measurements/perceived by child/parent to be normal

23  
24 192 O/O- overweight by actual measurements/perceived by child/parent to be overweight

25  
26 193 O/U- overweight by actual measurements/perceived by child/parent to be underweight

27  
28 194 The referent group was the N/N group.

29  
30 195 The association between the various socio-demographic factors as well with the above eight  
31 196 groups **and attempt to lose weight** was evaluated using the Chi-square test and the unadjusted  
32 197 odds ratio **are** reported. Association between attempt to lose weight and child's actual weight  
33 198 status, child's and parent's perception of child's weight status and the above mentioned eight  
34 199 groups were done using Chi square test stratified by age and gender. Binary logistic  
35 200 regression was performed to identify the factors associated with attempted weight loss  
36 201 adjusted for socio-demographic variables of age, gender, medium of instruction, parent's  
37 202 education and current actual body weight status, child's and parent's perceived and desired  
38 203 weight status of the child as model 1. In addition, a model (model 2) adjusted only for age,  
39 204 sex, medium of instruction, actual weight status and the child's weight perception was  
40 205 performed. Binary logistic regression was also performed to identify the factors associated  
41 206 with attempting to lose weight (Yes/No) based on the 8 groups (detailed above) created using  
42 207 the actual weight status of the child and child's or parent's perception of child's weight,  
43 208 adjusted for age, gender and medium of instruction. A level of significance (two-sided) less  
44 209 than 5% was considered statistically significant.

52  
53 210 **RESULTS:**

54  
55  
56 211 Of the 1907 study children, 1874 responded to the question on whether they had ever tried to  
57 212 lose weight. Of these, 65.5% of children were normal weight, 25.0 % underweight and 9.5%

1  
2  
3 213 overweight. Thirty two percent of children perceived themselves to be underweight; this was  
4 214 7% more than the actual prevalence of underweight. Similarly, 15.4% perceived themselves  
5 215 to be overweight (5.9% higher than the actual prevalence). In contrast, parents tended to  
6 216 under-estimate underweight (5% lower than the actual prevalence of under-weight).  
7  
8  
9

10 217 A total of 35% of children had attempted to lose weight; this constituted 73% of overweight  
11 218 and obese, 35% of normal weight and 22% of underweight children. Sixty eight percent of  
12 219 those children who perceived themselves to be overweight, 32% of those who perceived  
13 220 themselves to be normal, and 23% of those who perceived themselves to be underweight  
14 221 attempted to lose weight. Similarly, 54 % of children whose parents perceived them to be  
15 222 overweight, 35% who perceived them to be normal, and 21% of those who perceived them to  
16 223 be underweight attempted to lose weight. Correlations between actual weight status of the  
17 224 child and the child's or parent's perception of the child's weight status, as well as the child's  
18 225 and parent's perceptions on of desired (ideal) body weight ranged from 0.12 to 0.31 ( $p < 0.01$ )  
19 226 (Supplementary table 1) indicating a low to moderate correlation between these variables.  
20  
21  
22  
23  
24  
25  
26  
27

28 227 Among the socio-demographic factors (Table 1, Model 1), children in schools with Kannada  
29 228 as the medium of instruction were more likely to attempt to lose weight than those studying  
30 229 in schools with English as the medium of instruction (AOR= 1.57, 95% C.I: 1.11 to  
31 230 2.25). Underweight children were less likely to try to lose weight (AOR=0.71, 95% C.I: 0.51  
32 231 to 0.98), while overweight/obese children were more likely (AOR=4.38. 95% C.I: 2.64 to  
33 232 7.28) to try and lose weight compared to normal weight children. Based on the child's  
34 233 perception of their weight status, those who perceived themselves to be overweight were  
35 234 about 3 times more likely (AOR=2.91, 95% C.I: 1.95 to 4.34) to try to lose weight. Parental  
36 235 perception of weight status, however, did not have a significant impact on children  
37 236 attempting to lose weight. Children's (AOR=1.56, 95% C.I: 1.14 to 2.15) and parent's desire  
38 237 (AOR=1.79, 95% C.I: 1.25 to 2.58) for the child to be thinner also increased the likelihood of  
39 238 attempting to lose weight. Based on a simpler model (Model 2) the odds of attempting to  
40 239 lose weight was significantly higher among girls (1.37, CI: 1.11-1.70) compared to boys.  
41 240 Otherwise, the findings were similar to Model 1.  
42  
43  
44  
45  
46  
47  
48  
49  
50  
51

52 241 A stratified analysis based on age and gender (Supplementary table 2) was also done. While  
53 242 the groups were largely similar in terms of attempting to lose weight, significant differences  
54 243 were observed only among those children who were actually underweight as well as those  
55 244 who perceived themselves to be underweight. In these children, the prevalence of attempting  
56  
57  
58  
59  
60

245 to lose weight was significantly higher in older boys compared to older girls. Similarly, there  
246 was a significantly higher prevalence of younger girls attempting to lose weight compared to  
247 older girls, but not between younger and older boys.

248 Figure 1 represents the odds of a child attempting to lose weight based on the child's actual  
249 weight status in combination with the child's/parent's perception of weight status. After  
250 adjusting for age, gender and medium of instruction, the odds of attempting to lose weight  
251 (Figure 1, Supplementary table3) increased from 3.1 (95% CI: 2.2 to 4.4) for a normal weight  
252 child who perceive themselves to be overweight/obese, 3.7(95% CI: 2.2 to 6.2) for an  
253 overweight child who perceive themselves to be normal to 18.1 (95% CI: 8.8 to 36.9) for an  
254 overweight child who perceive themselves to be overweight. A similar trend was observed  
255 when parental perceptions were replaced with child's perception (Figure 1) with odds of  
256 attempting to lose weight increasing from 1.7 (95% CI: 1.1 to 2.7) for normal weight child  
257 perceived by a parent to be overweight, 4.7 (95% CI: 2.7 to 8.0) for an overweight child  
258 perceived by a parent to be normal to 19.3(95% CI: 6.8 to 54.8) for an overweight child  
259 perceived to be overweight by a parent. None of the underweight children were perceived by  
260 themselves or by their parents to be overweight. Among children who were underweight but  
261 perceived either by the child or parent to be underweight or normal, the odds of attempting to  
262 lose weight was reduced by approximately 60% to 40% respectively in relation to children of  
263 normal weight status perceived to be normal by both children and parents. The same ~~has~~  
264 ~~been analyses were was~~ done using prevalence of attempting to lose weight based on actual  
265 weight status, child's perception and parent's perception of child's weight status stratified by  
266 age and gender (Figure 2a and 2b).

267 The most commonly adopted practice to lose weight regardless of whether ~~the~~ children were  
268 underweight, overweight or normal was exercise (~46%), followed by reducing the quantity  
269 of food intake, ceasing to eat certain kinds of foods and skipping meals (Figure 3).

## 270 **DISCUSSION:**

271 In concurrence with the findings of our study, misperception of weight status among children  
272 has been reported in other studies conducted in the United States of America, with  
273 perceptions differing between various ethnic groups. Among African American adolescents,  
274 one-third perceived their weight status inaccurately<sup>(7)</sup>. Racial or ethnic differences in weight  
275 perception have been reported<sup>(5, 7, 8)</sup>, where Caucasians were more likely than African  
276 Americans to perceive themselves as overweight<sup>(5, 7, 9)</sup>. However, this has not been a

1  
2  
3 277 universal finding, as for instance in multi-ethnic adolescents in the United Kingdom <sup>(14)</sup>.  
4 278 Perceptions, however, ~~also governed~~ were also associated with their decision to attempt  
5  
6 279 weight loss, notwithstanding their current weight status.

7  
8  
9 280 In general, children who were actually overweight as well as those who were perceived by  
10 281 themselves or by their parents to be overweight were highly likely to try to lose weight.  
11 282 ~~Perceptions were associated with their decision to try to lose weight~~. This finding is similar to  
12 283 studies conducted in other countries <sup>(7, 8, 22)</sup>. Unless individuals or their families perceive their  
13 284 weight status correctly, their acceptance of programmes designed to encourage healthy  
14 285 weight may be low <sup>(17)</sup>.

15  
16  
17  
18  
19 286 The child's or parent's desire for the child to be thinner was **also associated with** their  
20 287 decision to try-attempt to lose weight. This desire was highest among those who perceived  
21 288 themselves to be overweight, although about one-third of those who perceived themselves to  
22 289 be normal weight and about one-fifth of those who perceived themselves to be underweight  
23 290 also attempted to lose weight. In contrast, among children who were underweight and those  
24 291 of normal weight, 32% and 23% desired to gain weight respectively. This clearly indicates  
25 292 that in a country where both underweight and overweight co-exist, care must be taken in  
26 293 developing programmes at a community level such that those who require to put on weight  
27 294 and those who need to lose weight are considered, as for example in the school feeding  
28 295 programmes.

29  
30  
31  
32  
33  
34  
35  
36 296  
37  
38 297 The fact that there were reported weight loss attempts even in the underweight group suggests  
39 298 that factors other than weight status and weight perception are operative. This is corroborated  
40 299 by the higher odds of children from Kannada medium schools, who belong to a relatively  
41 300 lower socio-economic status compared to children from English medium schools (higher  
42 301 SES) trying to lose weight. Thus socio-cultural factors may ~~also influence~~ be associated with  
43 302 their decision to lose weight. This could be linked to the continuous exposure to images and  
44 303 unrealistic body shapes that encourage weight loss regardless of body weight<sup>(8)</sup>. These  
45 304 factors must be further explored so that suitable programmes that encourage overweight  
46 305 children but not underweight or normal children to lose weight are planned.

47  
48  
49  
50  
51  
52  
53  
54 306 Included in our sample were children as young as 8 years of age. However, body  
55 307 dissatisfaction with increasing weight status was established even by the age of 5 in both  
56 308 boys and girls of South Asian origin in UK<sup>(3)</sup>. Irrespective of whether they were below or

1  
2  
3 309 above 10 years of age or whether they were boys or girls, children attempted to lose weight.  
4 310 In our study sample, there were no gender differences in weight loss attempts. This is  
5 311 contrary to the findings elsewhere, as for instance, the NHANES study <sup>(16)</sup>, which indicated  
6 312 that girls were about 2 ½ times more likely to attempt to lose weight. The absence of gender  
7 313 differences in our study may, in part, be due to the relatively low prevalence of overweight or  
8 314 obesity.

9  
10  
11  
12  
13  
14 315 It is encouraging that 46 % children indicated exercise their preferred choice of weight loss.  
15 316 Differences in the methods used to lose weight between overweight, normal and underweight  
16 317 children were not apparent unlike other studies where unhealthier weight loss methods like  
17 318 skipping meals are reported more in overweight or obese children compared to normal weight  
18 319 children <sup>(23)</sup>. However, an effect of social desirability cannot be discounted, given that  
19 320 exercise as a healthy lifestyle choice is promoted early in the school curriculum

20  
21  
22  
23  
24  
25 321 Body image must be taken into account when designing programmes to improve both body  
26 322 image and reduce unhealthy behaviours like unhealthy eating and reduced or excessive  
27 323 exercise <sup>(1)</sup>. Since public health programmes are generally targeted towards all, a general  
28 324 programme that caters to all children irrespective of their weight status is required.

29  
30  
31  
32 325 **Strengths and limitations:** This is the first study to report perceptions of body weight in  
33 326 India in relation to weight loss attempts. A major strength of this study is that measured  
34 327 heights and weights rather than self-reported, were used and the study sample encompassed  
35 328 children of diverse socio-economic strata, from rural and urban areas and of a large body  
36 329 weight range. However, with the cross-sectional study design used in this study, the changes  
37 330 in perception as the children grow cannot be accounted for. Longitudinal evaluation of these  
38 331 children will allow us to establish causal links between weight perception and weight loss  
39 332 behaviours. Both the fact that the study was cross-sectional in nature, as well as the design of  
40 333 the questionnaire were limitations as information regarding the frequency, duration, and  
41 334 intensity of weight loss efforts, or time-sequence of events, that is, the time (recent/current or  
42 335 past) at which such behaviours occurred could not be obtained. Data on the reliability and  
43 336 validity of the questionnaire are not available for this population. With the question asked on  
44 337 attempt to lose weight being dichotomous, there is a possibility that a child who is currently  
45 338 normal weight may report weight loss behaviours because they were overweight in the past.  
46 339 The small numbers of children in each category in the analysis stratified by actual and  
47 340 perceived weight status necessitates further exploration with larger numbers of children in

1  
2  
3 341 each category. A further limitation is that we have not collected data on attempt to gain  
4 342 weight.

5  
6 343

7  
8 344 Overall, perceptions of weight status **was associated with** the decision of children to lose  
9  
10 345 weight. This needs to be further explored as a longitudinal study to establish causal links.  
11 346 However, regardless of weight status, many children did resort to weight loss. Public health  
12 347 campaigns should emphasize healthy weight management rather than weight loss.

13  
14  
15 348

16  
17  
18 349 *Acknowledgements:* The authors thank Dr. Roopashree who helped in acquisition and entry  
19 350 of part of the data.

20  
21  
22  
23 351 *Contributors:* MP, SS and MV were responsible for the concept and design of the study. SS  
24 352 drafted and the manuscript. MP acquired the data. Sumithra Selvam (SRS) performed the  
25 353 statistical analysis and interpreted the data. MV conceived the study and interpreted the data.  
26 354 All authors revised the manuscript critically for important intellectual content. SS is the  
27 355 guarantor.

28  
29  
30  
31  
32 356 *Funding:* This research received no specific grant from any funding agency in the public,  
33 357 commercial or not-for-profit sectors.

34  
35 358 *Competing interests:* All authors have completed the Unified Competing Interest form at  
36 359 [www.icmje.org/coi\\_disclosure.pdf](http://www.icmje.org/coi_disclosure.pdf) (available on request from the corresponding author) and  
37 360 declare no support from any organisation for the submitted work; no financial relationships  
38 361 with any organisations that might have an interest in the submitted work in the previous 3  
39 362 years/ no other relationships or activities that could appear to have influence the submitted  
40 363 work.

41  
42  
43  
44  
45  
46 364 The Corresponding Author has the right to grant on behalf of all authors and does grant on  
47 365 behalf of all authors, an exclusive licence (or non exclusive for government employees) on a  
48 366 worldwide basis to the BMJ Publishing Group Ltd and its Licensees to permit this article (if  
49 367 accepted) to be published in BMJ editions and any other BMJ PGL products and sub-licences  
50 368 to exploit all subsidiary rights, as set out in your licence (  
51 369 <http://resources.bmj.com/bmj/authors/checklists-forms/licence-for-publication>)

52  
53  
54  
55  
56  
57 370



371 **References:**

- 372 1. Grogan S. Body image and health: contemporary perspectives. *J Health Psychol* 2006;11(4):523-30.
- 373
- 374 2. Cortese S, Falissard B, Pigaiani Y, Banzato C, Bogoni G, Pellegrino M, et al. The relationship  
375 between body mass index and body size dissatisfaction in young adolescents: spline function  
376 analysis. *J Am Diet Assoc* 2010;110(7):1098-102.
- 377 3. Pallan MJ, Hiam LC, Duda JL, Adab P. Body image, body dissatisfaction and weight status in  
378 South Asian children: a cross-sectional study. *BMC Public Health* 2011;11:21.
- 379 4. Jain V, Singhal A. Catch up growth in low birth weight infants: Striking a healthy balance. *Rev*  
380 *Endocr Metab Disord* 2012;13:141-147.
- 381 5. Martin MA, May AL, Frisco ML. Equal weights but different weight perceptions among US  
382 adolescents. *J Health Psychol* 2010;15(4):493-504.
- 383 6. Swami V, Frederick DA, Aavik T, Alcalay L, Allik J, Anderson D, et al. The attractive female body  
384 weight and female body dissatisfaction in 26 countries across 10 world regions: results of the  
385 international body project I. *Pers Soc Psychol Bull* 2010;36(3):309-25.
- 386 7. Wang Y, Liang H, Chen X. Measured body mass index, body weight perception, dissatisfaction  
387 and control practices in urban, low-income African American adolescents. *BMC Public Health*  
388 2009;9:183.
- 389 8. Duncan JS, Duncan EK, Schofield G. Associations between weight perceptions, weight control  
390 and body fatness in a multiethnic sample of adolescent girls. *Public Health Nutr* 2010;14(1):93-  
391 100.
- 392 9. Neff LJ, Sargent RG, McKeown RE, Jackson KL, Valois RF. Black-white differences in body size  
393 perceptions and weight management practices among adolescent females. *J Adolesc Health*  
394 1997;20(6):459-65.
- 395 10. Viner RM, Haines MM, Taylor SJ, Head J, Booy R, Stansfeld S. Body mass, weight control  
396 behaviours, weight perception and emotional well being in a multiethnic sample of early  
397 adolescents. *Int J Obes (Lond)* 2006;30(10):1514-21.
- 398 11. Ceballos N, Czyzewska M. Body image in Hispanic/Latino vs. European American adolescents:  
399 implications for treatment and prevention of obesity in underserved populations. *J Health*  
400 *Care Poor Underserved* 2010;21(3):823-38.
- 401 12. Ayala GX, Mickens L, Galindo P, Elder JP. Acculturation and body image perception among  
402 Latino youth. *Ethn Health* 2007;12(1):21-41.
- 403 13. Cachelin FM, Rebeck RM, Chung GH, Pelayo E. Does ethnicity influence body-size preference?  
404 A comparison of body image and body size. *Obes Res* 2002;10(3):158-166.
- 405 14. Haff HR. Racial/Ethnic differences in weight perceptions and weight control behaviors among  
406 adolescent females. *Youth & Society* 2009;41(2):278-301.
- 407 15. Ojala K, Vereecken C, Valimaa R, Currie C, Villberg J, Tynjala J, et al. Attempts to lose weight  
408 among overweight and non-overweight adolescents: a cross-national survey. *Int J Behav Nutr*  
409 *Phys Act* 2007;4:50.
- 410 16. Yan AF, Zhang G, Wang MQ, Stoesen CA, Harris BM. Weight perception and weight control  
411 practice in a multiethnic sample of US adolescents. *South Med J* 2009;102(4):354-60.
- 412 17. Edwards NM, Pettingell S, Borowsky IW. Where perception meets reality: self-perception of  
413 weight in overweight adolescents. *Pediatrics* 2010;125(3):e452-8.
- 414 18. Pauline M, Selvam S, Swaminathan S, Vaz M. Body weight perception is associated with socio-  
415 economic status and current body weight in selected urban and rural South Indian school-  
416 going children. *Public Health Nutr* 2012:1-9.
- 417 19. de Onis M, Onyango AW, Borghi E, Siyam A, Nishida C, Siekmann J. Development of a WHO  
418 growth reference for school-aged children and adolescents. *Bull World Health Organ*  
419 2007;85(9):660-7.
- 420 20. Stunkard AJ, Sorensen T, Schulsinger F. Use of the Danish Adoption Register for the study of  
421 obesity and thinness. In: Kety SS RL, Sidman RL, Matthysse SW, editor. *Genetics of*

- 1  
2  
3 422 Neurological and Psychiatric Disorders.of Neurological and Psychiatric Disorders. New York:  
4 423 Raven Press; 1983. p. 115-120.  
5 424 21. World Health Organization. Nutrition in adolescence.Issues and Challenges for the health  
6 425 sector. Discussion paper. Geneva: WHO; 2005.  
7 426 22. Alwan H, Viswanathan B, Paccaud F, Bovet P. Is Accurate Perception of Body Image Associated  
8 427 with Appropriate Weight-Control Behavior among Adolescents of the Seychelles. J Obes  
9 428 2011;2011:817242.  
10 429 23. Boutelle K, Neumark-Sztainer D, Story M, Resnick M. Weight control behaviors among obese,  
11 430 overweight, and nonoverweight adolescents. J Pediatr Psychol 2002;27(6):531-40.  
12 431  
13 432

For peer review only



1  
2  
3  
4  
5  
6  
7  
8  
9  
10  
11  
12  
13  
14  
15  
16  
17  
18  
19  
20  
21  
22  
23  
24  
25  
26  
27  
28  
29  
30  
31  
32  
33  
34  
35  
36  
37  
38  
39  
40  
41  
42  
43  
44  
45  
46  
47  
48  
49

Table 1. Socio-economic and anthropometric associations of weight loss behaviour

|                                | Attempted weight loss |           | Unadjusted OR<br>95% C.I. | P value*            | Adjusted † OR<br>Model 1<br>95% C.I. |                     | Adjusted ‡ OR<br>Model 2<br>95% C.I. | P value‡            |        |
|--------------------------------|-----------------------|-----------|---------------------------|---------------------|--------------------------------------|---------------------|--------------------------------------|---------------------|--------|
|                                | Yes                   | No        |                           |                     | P value‡                             | P value‡            |                                      |                     |        |
| Gender                         |                       |           |                           |                     |                                      |                     |                                      |                     |        |
|                                | Girls                 | 387 (39%) | 616 (61%)                 | 1.41<br>1.16 – 1.72 | <0.001                               | 1.16<br>0.89 – 1.51 | 0.27                                 | 1.37<br>1.11 – 1.70 | 0.01   |
|                                | Boys                  | 268 (31%) | 603 (69%)                 | 1                   |                                      | 1                   |                                      | 1                   |        |
| Age category (years)           |                       |           |                           |                     |                                      |                     |                                      |                     |        |
|                                | <=10                  | 245 (34%) | 469 (66%)                 | 0.96<br>0.78 – 1.17 | 0.65                                 | 1.04<br>0.79 – 1.36 | 0.76                                 | 1.03<br>0.83 – 1.28 | 0.79   |
|                                | >10                   | 410 (35%) | 750 (65%)                 | 1                   |                                      | 1                   |                                      | 1                   |        |
| Location                       |                       |           |                           |                     |                                      |                     |                                      |                     |        |
|                                | City                  | 408 (33%) | 812 (67%)                 | 0.83<br>0.68 – 1.01 | 0.06                                 | 1.03<br>0.78 – 1.36 | 0.81                                 | -                   | -      |
|                                | Non City              | 247 (38%) | 407 (62%)                 | 1                   |                                      | 1                   |                                      | -                   | -      |
| Education of mother (Standard) |                       |           |                           |                     |                                      |                     |                                      |                     |        |
|                                | Up to 7 <sup>th</sup> | 146 (34%) | 278 (66%)                 | 0.95<br>0.75 – 1.22 | 0.69                                 | 0.81<br>0.58 – 1.14 | 0.22                                 | -                   | -      |
|                                | > 7 <sup>th</sup>     | 400 (36%) | 727 (65%)                 | 1                   |                                      | 1                   |                                      | -                   | -      |
| Education of father (Standard) |                       |           |                           |                     |                                      |                     |                                      |                     |        |
|                                | Up to 7 <sup>th</sup> | 161 (39%) | 256 (61%)                 | 1.21<br>0.95 – 1.53 | 0.10                                 | 1.24<br>0.87-1.78   | 0.22                                 | -                   | -      |
|                                | > 7 <sup>th</sup>     | 437 (34%) | 838 (66%)                 | 1                   |                                      | 1                   |                                      | -                   | -      |
| Medium of instruction          |                       |           |                           |                     |                                      |                     |                                      |                     |        |
|                                | Kannada               | 198 (39%) | 308 (61%)                 | 1.28<br>1.03- 1.59  | 0.02                                 | 1.57<br>1.11 – 2.25 | 0.01                                 | 1.52<br>1.20 – 1.92 | <0.001 |
|                                | English <sup>1</sup>  | 457(33%)  | 911 (67%)                 | 1                   |                                      | 1                   |                                      | 1                   |        |

|                                           |           |           |             |        |             |        |             |        |  |
|-------------------------------------------|-----------|-----------|-------------|--------|-------------|--------|-------------|--------|--|
| Actual weight status                      |           |           |             |        |             |        |             |        |  |
| Underweight                               | 98 (22%)  | 352 (78%) | 0.52        | <0.001 | 0.71        | 0.04   | 0.66        |        |  |
|                                           |           |           | 0.40 – 0.67 |        | 0.51 – 0.98 |        | 0.50 – 0.86 | 0.002  |  |
| Overweight                                | 125 (73%) | 47 (27%)  | 4.96        | <0.001 | 4.38        | <0.001 | 3.86        |        |  |
|                                           |           |           | 3.43 – 7.20 |        | 2.64 – 7.28 |        | 2.63 – 5.64 | <0.001 |  |
| Normal                                    | 412 (35%) | 769 (65%) | 1           |        | 1           |        |             |        |  |
| Child's perception of body image          |           |           |             |        |             |        |             |        |  |
| Too /A little Thin                        | 133 (23%) | 457 (77%) | 0.61        | <0.001 | 0.67        | 0.01   | 0.64        | <0.001 |  |
|                                           |           |           | 0.48 – 0.77 |        | 0.49 – 0.93 |        | 0.49 – 0.82 |        |  |
| A little /Too fat                         | 195 (68%) | 91 (32%)  | 4.48        | <0.001 | 2.91        | <0.001 | 3.48        | <0.001 |  |
|                                           |           |           | 3.35 – 6.00 |        | 1.95 – 4.34 |        | 2.57 – 4.69 |        |  |
| Normal                                    | 318 (32%) | 665 (68%) | 1           |        | 1           |        |             |        |  |
| Child's desire to be                      |           |           |             |        |             |        |             |        |  |
| A lot /Slightly fatter                    | 114 (25%) | 347 (75%) | 0.76        | 0.03   | 0.84        | 0.35   |             |        |  |
|                                           |           |           | 0.58 – 0.98 |        | 0.59 – 1.20 |        |             |        |  |
| Slightly/Much thinner                     | 260(52%)  | 237 (48%) | 2.53        | <0.001 | 1.56        | 0.006  | -           | -      |  |
|                                           |           |           | 2.00 – 3.19 |        | 1.14 – 2.15 |        |             |        |  |
| Same as at present                        | 272 (30%) | 627 (70%) | 1           |        | 1           |        |             |        |  |
| Parent's perception of child's body image |           |           |             |        |             |        |             |        |  |
| Too /A little Thin                        | 66 (22%)  | 241 (79%) | 0.52        | <0.001 | 0.76        | 0.15   |             |        |  |
|                                           |           |           | 0.38 – 0.71 |        | 0.52 – 1.12 |        | -           | -      |  |
| A little /Too fat                         | 95 (54%)  | 82 (46%)  | 2.20        | <0.001 | 0.86        |        |             |        |  |
|                                           |           |           | 1.58 – 3.08 |        | 0.51 – 1.37 | 0.51   |             |        |  |
| Normal                                    | 364 (35%) | 690 (66%) | 1           |        | 1           |        |             |        |  |
| Parent's desire for child to be           |           |           |             |        |             |        |             |        |  |
| A lot /Slightly fatter                    | 87 (21%)  | 331 (79%) | 0.54        | <0.001 | 0.75        | 0.11   |             |        |  |
|                                           |           |           | 0.41- 0.72  |        | 0.52 – 1.07 |        | -           | -      |  |
| Slightly /Much thinner                    | 170 (56%) | 134 (44%) | 2.61        | <0.001 | 1.79        |        |             |        |  |
|                                           |           |           | 1.98 – 3.46 |        | 1.25 – 2.58 | 0.002  |             |        |  |
| Same as at present                        | 263 (33%) | 542 (67%) | 1           |        | 1           |        |             |        |  |

Results are reported as Number (percentages); OR – Odds Ratio; 95% C.I. – 95% Confidence Interval

\*Fisher's Exact test or Chi square test

1  
2  
3  
4  
5  
6  
7  
8  
9  
10  
11  
12  
13  
14  
15  
16  
17  
18  
19  
20  
21  
22  
23  
24  
25  
26  
27  
28  
29  
30  
31  
32  
33  
34  
35  
36  
37  
38  
39  
40  
41  
42  
43  
44  
45  
46  
47  
48  
49

- † Adjusted for actual BMI status, child’s and parents perception of body weight and socio-demographic factors
- ‡ Obtained by fitting binary logistic regression model. Model 1: Adjusted for socio-demographic variables and actual and perceived weight
- ¶ Obtained by fitting binary logistic regression model. Model 2: Adjusted for age, gender, medium of instruction, actual weight status and child’s perception of body weight.

For peer review only

1  
2  
3  
4  
5  
6  
7  
8 **Figure Legends:**  
9

10 **Figure 1: Odds ratio of having tried to lose body weight in children classified by current**  
11 **weight status and perception of body weight.**

12 ■ Comparison of child's actual weight  
13 status with child's perception of weight status □ Comparison of child's actual weight  
14 status with parental perception of weight status. U/U: underweight by actual  
15 measurements/child's or parent's perception of being underweight, U/N: underweight by  
16 actual measurements/child's or parent's perception of being normal, N/U- normal by actual  
17 measurements/perceived by child/parent to be underweight, N/N: normal by actual  
18 measurements/child's or parent's perception of being normal, N/O: normal by actual  
19 measurements/child's or parent's perception of being overweight, O/N: overweight by actual  
20 measurements/child's or parent's perception of being normal, O/O: overweight by actual  
21 measurements/child's or parent's perception of being overweight, O/U: overweight by actual  
22 measurements/child's or parent's perception of being underweight.  
23  
24  
25  
26  
27  
28  
29  
30  
31  
32

33  
34 **Figure 2a and 2b: Prevalence of attempting to lose weight by gender and age category**  
35 **based on actual weight status and children and parent's perception of child's body**  
36 **weight. UW – Underweight, OW – Overweight**  
37  
38  
39

40 **Figure 3: Actual weight status and weight loss practices of children**

41  
42 ■ Exercise ■ Reduced quantity of food eaten ■ Stopped eating certain kind of foods  
43 □ Skipping meals  
44  
45  
46  
47  
48  
49  
50  
51  
52  
53  
54  
55  
56  
57  
58  
59  
60

STROBE 2007 (v4) Statement—Checklist of items that should be included in reports of *cross-sectional studies*

| Section/Topic                | Item # | Recommendation                                                                                                                                                                       | Reported on page #    |
|------------------------------|--------|--------------------------------------------------------------------------------------------------------------------------------------------------------------------------------------|-----------------------|
| Title and abstract           | 1      | (a) Indicate the study's design with a commonly used term in the title or the abstract                                                                                               | 2                     |
|                              |        | (b) Provide in the abstract an informative and balanced summary of what was done and what was found                                                                                  | 2                     |
| <b>Introduction</b>          |        |                                                                                                                                                                                      |                       |
| Background/rationale         | 2      | Explain the scientific background and rationale for the investigation being reported                                                                                                 | 3 and 4               |
| Objectives                   | 3      | State specific objectives, including any prespecified hypotheses                                                                                                                     | 4                     |
| <b>Methods</b>               |        |                                                                                                                                                                                      |                       |
| Study design                 | 4      | Present key elements of study design early in the paper                                                                                                                              | 4                     |
| Setting                      | 5      | Describe the setting, locations, and relevant dates, including periods of recruitment, exposure, follow-up, and data collection                                                      | 4                     |
| Participants                 | 6      | (a) Give the eligibility criteria, and the sources and methods of selection of participants                                                                                          | 4                     |
| Variables                    | 7      | Clearly define all outcomes, exposures, predictors, potential confounders, and effect modifiers. Give diagnostic criteria, if applicable                                             | 4 and 5               |
| Data sources/<br>measurement | 8*     | For each variable of interest, give sources of data and details of methods of assessment (measurement). Describe comparability of assessment methods if there is more than one group | 4 and 5               |
| Bias                         | 9      | Describe any efforts to address potential sources of bias                                                                                                                            | <i>Not applicable</i> |
| Study size                   | 10     | Explain how the study size was arrived at                                                                                                                                            | 4                     |
| Quantitative variables       | 11     | Explain how quantitative variables were handled in the analyses. If applicable, describe which groupings were chosen and why                                                         | 5                     |
| Statistical methods          | 12     | (a) Describe all statistical methods, including those used to control for confounding                                                                                                | 5 and 6               |
|                              |        | (b) Describe any methods used to examine subgroups and interactions                                                                                                                  | 5 and 6               |
|                              |        | (c) Explain how missing data were addressed                                                                                                                                          | Not applicable        |
|                              |        | (d) If applicable, describe analytical methods taking account of sampling strategy                                                                                                   | -                     |
|                              |        | (e) Describe any sensitivity analyses                                                                                                                                                | Not applicable        |
| <b>Results</b>               |        |                                                                                                                                                                                      |                       |

|                          |     |                                                                                                                                                                                                              |                |
|--------------------------|-----|--------------------------------------------------------------------------------------------------------------------------------------------------------------------------------------------------------------|----------------|
| Participants             | 13* | (a) Report numbers of individuals at each stage of study—eg numbers potentially eligible, examined for eligibility, confirmed eligible, included in the study, completing follow-up, and analysed            | 5              |
|                          |     | (b) Give reasons for non-participation at each stage                                                                                                                                                         | 5              |
|                          |     | (c) Consider use of a flow diagram                                                                                                                                                                           | Not used       |
| Descriptive data         | 14* | (a) Give characteristics of study participants (eg demographic, clinical, social) and information on exposures and potential confounders                                                                     | 5              |
|                          |     | (b) Indicate number of participants with missing data for each variable of interest                                                                                                                          | 5              |
| Outcome data             | 15* | Report numbers of outcome events or summary measures                                                                                                                                                         | 5 and 6        |
| Main results             | 16  | (a) Give unadjusted estimates and, if applicable, confounder-adjusted estimates and their precision (eg, 95% confidence interval). Make clear which confounders were adjusted for and why they were included | 6,7,12,13      |
|                          |     | (b) Report category boundaries when continuous variables were categorized                                                                                                                                    | 5              |
|                          |     | (c) If relevant, consider translating estimates of relative risk into absolute risk for a meaningful time period                                                                                             | Not applicable |
| Other analyses           | 17  | Report other analyses done—eg analyses of subgroups and interactions, and sensitivity analyses                                                                                                               | Not applicable |
| <b>Discussion</b>        |     |                                                                                                                                                                                                              |                |
| Key results              | 18  | Summarise key results with reference to study objectives                                                                                                                                                     | 7 and 8        |
| Limitations              | 19  | Discuss limitations of the study, taking into account sources of potential bias or imprecision. Discuss both direction and magnitude of any potential bias                                                   | Not applicable |
| Interpretation           | 20  | Give a cautious overall interpretation of results considering objectives, limitations, multiplicity of analyses, results from similar studies, and other relevant evidence                                   | 7, 8 and 9     |
| Generalisability         | 21  | Discuss the generalisability (external validity) of the study results                                                                                                                                        | 9              |
| <b>Other information</b> |     |                                                                                                                                                                                                              |                |
| Funding                  | 22  | Give the source of funding and the role of the funders for the present study and, if applicable, for the original study on which the present article is based                                                | 9              |

\*Give information separately for cases and controls in case-control studies and, if applicable, for exposed and unexposed groups in cohort and cross-sectional studies.

**Note:** An Explanation and Elaboration article discusses each checklist item and gives methodological background and published examples of transparent reporting. The STROBE checklist is best used in conjunction with this article (freely available on the Web sites of PLoS Medicine at <http://www.plosmedicine.org/>, Annals of Internal Medicine at <http://www.annals.org/>, and Epidemiology at <http://www.epidem.com/>). Information on the STROBE Initiative is available at [www.strobe-statement.org](http://www.strobe-statement.org).

1  
2  
3  
4  
5  
6  
7  
8  
9  
10  
11  
12  
13  
14  
15  
16  
17  
18  
19  
20  
21  
22  
23  
24  
25  
26  
27  
28  
29  
30  
31  
32  
33  
34  
35  
36  
37  
38  
39  
40  
41  
42  
43  
44  
45  
46  
47  
48  
49  
50  
51  
52  
53  
54  
55  
56  
57  
58  
59  
60

**FIGURE 1: ODDS RATIO OF ATTEMPTING TO LOSE WEIGHT IN CHILDREN CLASSIFIED BY CURRENT WEIGHT STATUS OF CHILDREN WITH CHILD'S AND PARENT'S PERCEPTION OF CHILD'S BODY WEIGHT**

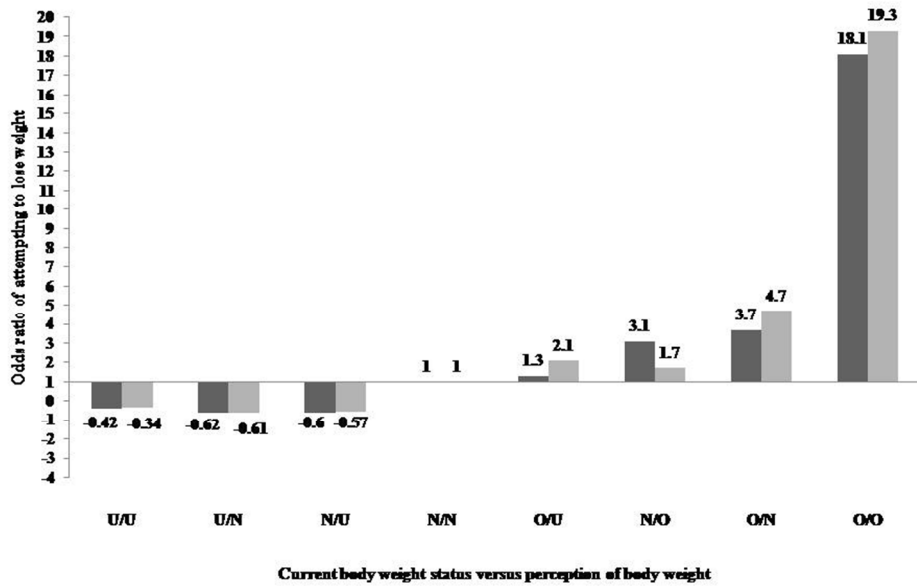

254x190mm (96 x 96 DPI)

Review only



**FIGURE 2A: PREVALENCE OF ATTEMPTING TO LOSE WEIGHT BY GENDER AND AGE CATEGORY BASED ON ACTUAL WEIGHT STATUS AND CHILD'S PERCEPTION OF BODY WEIGHT**



254x190mm (96 x 96 DPI)

View only

1  
2  
3  
4  
5  
6  
7  
8  
9  
10  
11  
12  
13  
14  
15  
16  
17  
18  
19  
20  
21  
22  
23  
24  
25  
26  
27  
28  
29  
30  
31  
32  
33  
34  
35  
36  
37  
38  
39  
40  
41  
42  
43  
44  
45  
46  
47  
48  
49  
50  
51  
52  
53  
54  
55  
56  
57  
58  
59  
60

**FIGURE 2B: PREVALENCE OF ATTEMPTING TO LOSE WEIGHT BY GENDER AND AGE CATEGORY BASED ON ACTUAL WEIGHT STATUS AND PARENT'S PERCEPTION OF BODY WEIGHT**

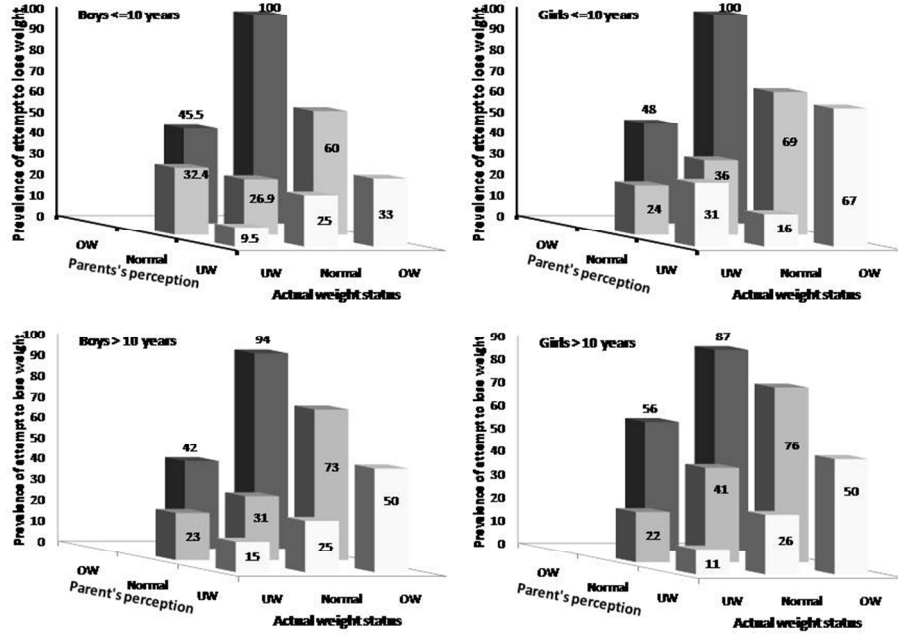

254x190mm (96 x 96 DPI)

Review only

Figure 2: Actual weight status and weight loss practices of children

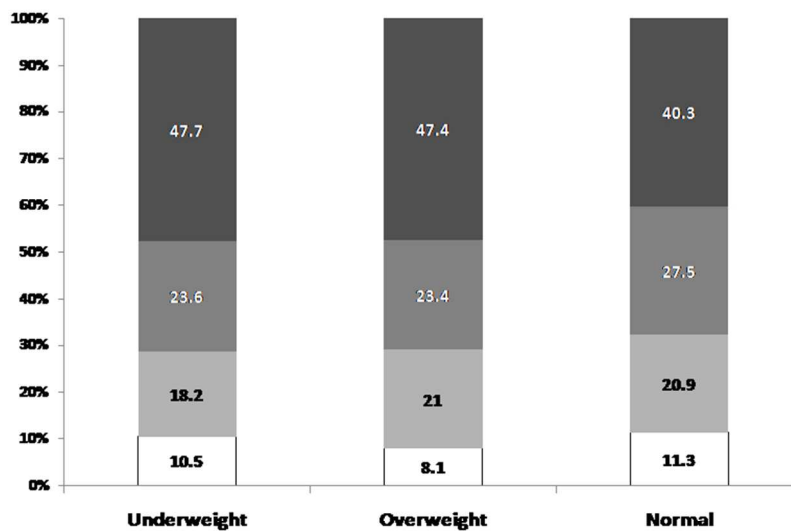

254x190mm (96 x 96 DPI)

ew only

1  
2  
3  
4  
5  
6  
7  
8  
9  
10  
11  
12  
13  
14  
15  
16  
17  
18  
19  
20  
21  
22  
23  
24  
25  
26  
27  
28  
29  
30  
31  
32  
33  
34  
35  
36  
37  
38  
39  
40  
41  
42  
43  
44  
45  
46  
47  
48  
49  
50  
51  
52  
53  
54  
55  
56  
57  
58  
59  
60

**Supplementary Table 1: Correlation matrix of actual weight status, child's and parent's perception of child's present weight and desired weight status**

|                                            | Actual weight status | Child's perception of body weight | Child's desired weight status | Parent's perception of child's body weight | Parents desired for child's weight status |
|--------------------------------------------|----------------------|-----------------------------------|-------------------------------|--------------------------------------------|-------------------------------------------|
| Actual weight status                       | 1                    |                                   |                               |                                            |                                           |
| Child's perception of body weight          | 0.26                 | 1                                 |                               |                                            |                                           |
| Child's desired weight status              | 0.15                 | 0.21                              | 1                             |                                            |                                           |
| Parent's perception of child's body weight | 0.17                 | 0.30                              | 0.12                          | 1                                          |                                           |
| Parents desired for child's weight status  | 0.18                 | 0.19                              | 0.31                          | 0.28                                       | 1                                         |

**Supplementary Table 2: Prevalence of attempt to lose weight by gender and age category:**

|                                           | Attempt to lose weight |             |             |            | P value* |
|-------------------------------------------|------------------------|-------------|-------------|------------|----------|
|                                           | Boys                   |             | Girls       |            |          |
|                                           | <=10                   | >10         | <=10        | >10        |          |
| <b>Actual weight status</b>               |                        |             |             |            |          |
| Underweight                               | 19 (25.0)              | 36 (20.2)†  | 23 (32.4)‡  | 20 (16.0)  | 0.002    |
| Overweight                                | 20 (64.5)              | 30 (78.9)   | 24 (72.7)   | 51 (72.9)  | 0.89     |
| Normal                                    | 60 (29.3)              | 96 (30.7)   | 92 (34.3)   | 164 (41.5) | -        |
| <b>Child's perception of body weight</b>  |                        |             |             |            |          |
| Too thin/Little thin                      | 24 (23.5)              | 38 (20.4) † | 40 (29.0) : | 31 (18.9)  | 0.006    |
| Too fat/little fat                        | 21 (46.7)              | 49 (63.6)   | 41 (78.8)   | 84 (75.0)  | 0.25     |
| Normal                                    | 55 (30.9)              | 76 (27.5)   | 62 (32.1)   | 125 (37.2) | -        |
| <b>Parent's perception of body weight</b> |                        |             |             |            |          |
| Too thin/Little thin                      | 9 (18.0)               | 21(21.0)    | 14 (25.5)   | 22 (21.6)  | 0.60     |
| Too fat/little fat                        | 10 (47.6)              | 32 (48.5)   | 15 (48.4)   | 38 (64.4)  | 0.17     |
| Normal                                    | 51 (29.1)              | 88 (30.4)   | 82 (36.0)   | 143 (39.5) | -        |

Reported as number and within parenthesis percentages; \*Fisher's Exact test or Chi square test;  
 † Among older/younger age group children significant difference between boys and girls  
 ‡ Among girls significant difference between the younger and older age group children  
 p values for O/U not reported due to small numbers.

(Supplementary) Table 3: Odds ratio of attempting to lose weight in comparison to actual weight status of the children and the child's perception of body weight

| Actual BMI       | Child's Perception of body weight | Attempted weight loss |     | Unadjusted OR<br>95% C.I. | P value* | Adjusted†<br>OR<br>95% C.I. | P value‡ |
|------------------|-----------------------------------|-----------------------|-----|---------------------------|----------|-----------------------------|----------|
|                  |                                   | Yes                   | No  |                           |          |                             |          |
| Normal           | Overweight/Obese                  | 105                   | 67  | 3.1<br>2.22 – 4.58        | <0.001   | 3.1<br>2.2 -4.42            | <0.001   |
| Overweight/Obese | Overweight/Obese                  | 74                    | 9   | 16.7<br>7.93 – 36.54      | <0.001   | 18.1<br>8.8 -36.9           | <0.001   |
| Overweight/Obese | Normal                            | 43                    | 25  | 3.5<br>2.03 – 6.08        | <0.001   | 3.7<br>2.2 – 6.2            | <0.001   |
| Overweight/Obese | Underweight                       | 8                     | 12  | 1.36<br>0.50 – 3.62       | 0.50     | 1.37<br>0.55 – 3.4          | 0.50     |
| Underweight      | Underweight                       | 30                    | 123 | 0.50<br>0.32 – 0.78       | <0.001   | 0.49<br>0.32-0.77           | 0.001    |
| Underweight      | Normal                            | 67                    | 226 | 0.60<br>0.43 – 0.84       | 0.001    | 0.62<br>0.45 – 0.86         | 0.004    |
| Normal           | Underweight                       | 81                    | 254 | 0.65<br>0.48 – 0.88       | 0.004    | 0.60<br>0.45 – 0.82         | 0.001    |
| Normal           | Normal                            | 219                   | 446 | 1                         |          | 1                           |          |

Results are reported as Number and %; OR – Odds Ratio; 95% C.I. – 95% Confidence Interval

\*Fisher's Exact test or Chi square test

†Adjusted for age, gender and medium of instruction

‡‡ Obtained by fitting binary logistic regression models

(Supplementary) Table 4: Odds ratio of attempting to lose weight in comparison to actual weight status of the children and the parent's perception of child's body weight

| Actual BMI status of the children | Parent's Perception of body weight | Attempted weight loss |     | Unadjusted OR<br>95% C.I. | P Value* | Adjusted †<br>OR<br>95% C.I. | P value‡ |
|-----------------------------------|------------------------------------|-----------------------|-----|---------------------------|----------|------------------------------|----------|
|                                   |                                    | Yes                   | No  |                           |          |                              |          |
| Normal                            | Overweight/Obese                   | 43                    | 47  | 1.69<br>1.07 – 2.69       | 0.01     | 1.74<br>1.1 – 2.7            | 0.01     |
| Overweight/Obese                  | Overweight/Obese                   | 40                    | 4   | 18.5<br>6.25 – 61.63      | <0.001   | 19.3<br>6.8- 54.8            | <0.001   |
| Overweight/Obese                  | Normal                             | 50                    | 21  | 4.4<br>2.52 – 7.77        | <0.001   | 4.7<br>2.7 – 8.0             | <0.001   |
| Overweight/Obese                  | Underweight                        | 10                    | 9   | 2.06<br>0.76 – 5.58       | 0.11     | 2.17<br>0.87 – 5.4           | 0.10     |
| Underweight                       | Underweight                        | 18                    | 102 | 0.33<br>0.19 – 0.57       | <0.001   | 0.34<br>0.20 – 0.57          | <0.001   |
| Underweight                       | Normal                             | 58                    | 181 | 0.59<br>0.42 – 0.84       | 0.001    | 0.61<br>0.44 – 0.86          | 0.004    |
| Normal                            | Underweight                        | 37                    | 121 | 0.57<br>0.37 – 0.86       | 0.004    | 0.57<br>0.38 – 0.84          | 0.005    |
| Normal                            | Normal                             | 257                   | 476 | 1                         |          | 1                            |          |

Results are reported as Number and %; OR – Odds Ratio; 95% C.I. – 95% Confidence Interval

\* Fisher's Exact test or Chi square test

†Adjusted for age, gender and medium of instruction

‡‡ Obtained by fitting binary logistic regression models
